# Supplementary material for: An efficient approach to azirino and pyrrolo-fused dibenzazepines. Conformations of substituted dibenzo[c,f]pyrrolo[1,2-a]azepines
Source: Royal Society of Chemistry journal article supplement (doi:10.1039/c1ob05081h), 2011-01-01
Supplement: c1ob05081h.pdf [file c1ob05081h.pdf]

*Supporting Information for:*

**New approach to azepino-fused heterocycles. Conformations of dibenzo[*c,f*]pyrrolo[1,2-*a*]-azepine systems**

Alexander F. Khlebnikov,<sup>\*a</sup> Mikhail S. Novikov<sup>a</sup> Maria V. Golovkina,<sup>a</sup> Petr P. Petrovskii,<sup>a</sup> Alexander S. Konev,<sup>a</sup> Dmitry S. Yufit,<sup>b</sup> and Helen Stoeckli-Evans<sup>c</sup>

<sup>a</sup> *Universitetskii pr. 26 , 198504 St. Petersburg, Russia. Fax: +7 812 4286939; Tel: +7 812 4284021; [alexander.khlebnikov@pobox.spbu.ru](mailto:alexander.khlebnikov@pobox.spbu.ru)*

<sup>b</sup> *Department of Chemistry, University of Durham, Durham, South Rd., DH1 3L (UK) . Fax: +44 191-334-2051; Tel: +44 191-334-2004; E-mail: [d.s.yufit@durham.ac.uk](mailto:d.s.yufit@durham.ac.uk)*

<sup>c</sup> *Institute of Physics, University of Neuchâtel, rue Emile-Argand 11, CH-2000 Neuchâtel, Switzerland. Fax: +41 32 7182511; Tel: +41 32 7182426; E-mail: [helen.stoeckli-evans@unine.ch](mailto:helen.stoeckli-evans@unine.ch)*

Pages **2-39**: X-Ray crystal structure of **2b**, **13**, **16**, **18**, **20**.

Pages **40-52**: 2D-<sup>1</sup>H-NOESY spectra of compound **13**, **15-19**, **29**.

Pages **53-61**: Computational details.

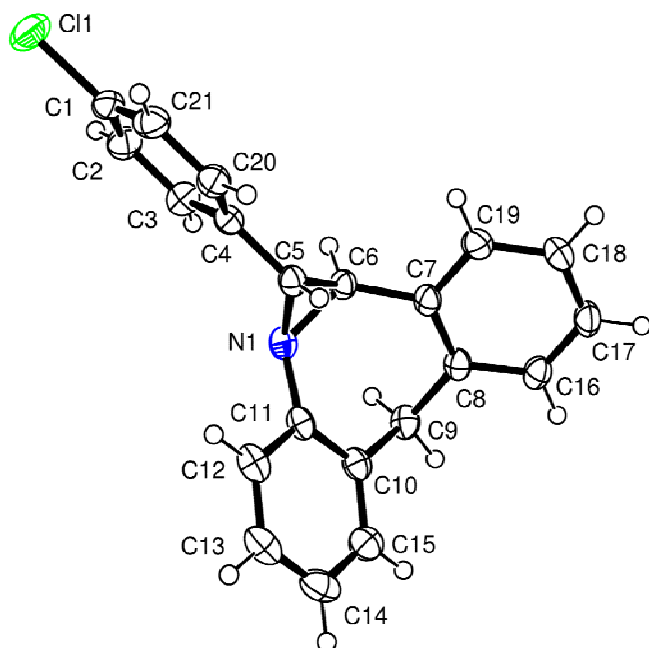

X-Ray crystal structure of **2b**.

Table S1 - Crystal Data and Details of the Structure Determination  
for: **2b** P 21/n R = 0.04

Crystal Data

|                          |  |            |           |    |             |
|--------------------------|--|------------|-----------|----|-------------|
| Formula                  |  | C21        | H16       | Cl | N           |
| Formula Weight           |  |            |           |    | 317.80      |
| Crystal System           |  |            |           |    | Monoclinic  |
| Space group              |  | P21/n      |           |    | (No. 14)    |
| a, b, c [Angstrom]       |  | 11.5596(6) | 9.9041(5) |    | 13.9757(7)  |
| alpha, beta, gamma [deg] |  | 90         | 91.254(4) |    | 90          |
| V [Ang**3]               |  |            |           |    | 1599.66(14) |
| Z                        |  |            |           |    | 4           |
| D(calc) [g/cm**3]        |  |            |           |    | 1.320       |
| Mu(MoKa) [ /mm ]         |  |            |           |    | 0.237       |
| F(000)                   |  |            |           |    | 664         |
| Crystal Size [mm]        |  | 0.40 x     | 0.40 x    |    | 0.45        |

Data Collection

|                                  |  |           |           |  |           |
|----------------------------------|--|-----------|-----------|--|-----------|
| Temperature (K)                  |  |           |           |  | 173       |
| Radiation [Angstrom]             |  | MoKa      |           |  | 0.71073   |
| Theta Min-Max [Deg]              |  |           |           |  | 2.3, 26.7 |
| Dataset                          |  | -14: 14 ; | -12: 12 ; |  | -16: 17   |
| Tot., Uniq. Data, R(int)         |  | 16074,    | 3392,     |  | 0.051     |
| Observed data [I > 2.0 sigma(I)] |  |           |           |  | 2979      |

## Refinement

Nref, Npar 3392, 209  
 R, wR2, S 0.0383, 0.0957, 1.05  
 $w = 1/[\sqrt{s^2(F_o^2) + (0.0383P)^2 + 0.6473P}]$  where  $P = (F_o^2 + 2F_c^2)/3$   
 Max. and Av. Shift/Error 0.00, 0.00  
 Min. and Max. Resd. Dens. [e/Å<sup>3</sup>] -0.24, 0.26

Table S2 - Final Coordinates and Equivalent Isotropic Displacement Parameters of the non-Hydrogen atoms for: **2b** P 21/n R = 0.04

| Atom | x           | y            | z           | U(eq) [Å <sup>2</sup> ] |
|------|-------------|--------------|-------------|-------------------------|
| ---- | ---         | ---          | ---         | -----                   |
| C11  | 0.02583(4)  | 0.76754(4)   | 0.42065(4)  | 0.0508(2)               |
| N1   | 0.37957(10) | 0.24743(12)  | 0.56555(8)  | 0.0280(3)               |
| C1   | 0.11285(13) | 0.64848(14)  | 0.47976(12) | 0.0332(4)               |
| C2   | 0.20466(13) | 0.59323(15)  | 0.43182(12) | 0.0354(5)               |
| C3   | 0.27303(13) | 0.49776(16)  | 0.47803(11) | 0.0325(4)               |
| C4   | 0.25086(12) | 0.45781(14)  | 0.57157(10) | 0.0267(4)               |
| C5   | 0.32319(11) | 0.35476(14)  | 0.62198(10) | 0.0262(4)               |
| C6   | 0.45214(11) | 0.34985(14)  | 0.61288(10) | 0.0251(4)               |
| C7   | 0.52974(11) | 0.32295(14)  | 0.69633(10) | 0.0262(4)               |
| C8   | 0.60182(11) | 0.20952(15)  | 0.69835(10) | 0.0262(4)               |
| C9   | 0.59224(12) | 0.10497(15)  | 0.61952(10) | 0.0304(4)               |
| C10  | 0.47544(12) | 0.03601(15)  | 0.61922(10) | 0.0285(4)               |
| C11  | 0.37477(12) | 0.11030(15)  | 0.59848(10) | 0.0277(4)               |
| C12  | 0.26691(13) | 0.04690(16)  | 0.60031(11) | 0.0338(4)               |
| C13  | 0.25871(14) | -0.08938(17) | 0.62150(11) | 0.0385(5)               |
| C14  | 0.35753(16) | -0.16373(17) | 0.64188(11) | 0.0402(5)               |
| C15  | 0.46493(14) | -0.10055(16) | 0.64132(11) | 0.0355(5)               |
| C16  | 0.68129(12) | 0.19478(16)  | 0.77436(10) | 0.0300(4)               |
| C17  | 0.68883(13) | 0.28983(16)  | 0.84679(11) | 0.0340(4)               |
| C18  | 0.61733(13) | 0.40156(16)  | 0.84488(11) | 0.0348(5)               |
| C19  | 0.53790(12) | 0.41851(15)  | 0.76941(11) | 0.0315(4)               |
| C20  | 0.15814(12) | 0.51655(15)  | 0.61807(11) | 0.0301(4)               |
| C21  | 0.08817(13) | 0.61173(15)  | 0.57247(12) | 0.0343(4)               |

U(eq) = 1/3 of the trace of the orthogonalized U Tensor

Table S3 - Hydrogen Atom Positions and Isotropic Displacement Parameters

for: **2b**      P 21/n      R = 0.04

| Atom | x       | y        | z       | U(iso) [Ang^2] |
|------|---------|----------|---------|----------------|
| ---- | ---     | ---      | ---     | -----          |
| H2   | 0.22060 | 0.62030  | 0.36820 | 0.0420         |
| H3   | 0.33610 | 0.45880  | 0.44550 | 0.0390         |
| H5   | 0.29380 | 0.32520  | 0.68540 | 0.0310         |
| H6   | 0.48300 | 0.41900  | 0.56800 | 0.0300         |
| H9A  | 0.60350 | 0.14920  | 0.55690 | 0.0360         |
| H9B  | 0.65390 | 0.03660  | 0.62870 | 0.0360         |
| H12  | 0.19870 | 0.09760  | 0.58690 | 0.0410         |
| H13  | 0.18500 | -0.13190 | 0.62200 | 0.0460         |
| H14  | 0.35200 | -0.25730 | 0.65620 | 0.0480         |
| H15  | 0.53250 | -0.15150 | 0.65630 | 0.0430         |
| H16  | 0.73090 | 0.11830  | 0.77640 | 0.0360         |
| H17  | 0.74340 | 0.27820  | 0.89800 | 0.0410         |
| H18  | 0.62230 | 0.46650  | 0.89480 | 0.0420         |
| H19  | 0.48900 | 0.49560  | 0.76770 | 0.0380         |
| H20  | 0.14250 | 0.49110  | 0.68200 | 0.0360         |
| H21  | 0.02460 | 0.65080  | 0.60440 | 0.0410         |

=====

The Temperature Factor has the Form of  $\text{Exp}(-T)$  Where  
 $T = 8*(\text{Pi}**2)*U*(\text{Sin}(\text{Theta})/\text{Lambda})**2$  for Isotropic Atoms

Table S4 - (An)isotropic Displacement Parameters

for: **2b**      P 21/n      R = 0.04

| Atom | U(1,1) or U | U(2,2)    | U(3,3)    | U(2,3)     | U(1,3)     | U(1,2)     |
|------|-------------|-----------|-----------|------------|------------|------------|
| ---- | -----       | -----     | -----     | -----      | -----      | -----      |
| C11  | 0.0450(3)   | 0.0352(2) | 0.0717(3) | 0.0184(2)  | -0.0113(2) | 0.0047(2)  |
| N1   | 0.0228(6)   | 0.0327(6) | 0.0284(6) | -0.0012(5) | -0.0018(4) | -0.0010(5) |
| C1   | 0.0302(7)   | 0.0226(7) | 0.0464(9) | 0.0052(6)  | -0.0078(6) | -0.0037(6) |
| C2   | 0.0392(8)   | 0.0317(8) | 0.0351(8) | 0.0088(6)  | -0.0003(6) | -0.0045(6) |
| C3   | 0.0299(7)   | 0.0340(8) | 0.0336(7) | 0.0028(6)  | 0.0034(6)  | 0.0008(6)  |
| C4   | 0.0252(7)   | 0.0246(7) | 0.0301(7) | -0.0004(5) | -0.0016(5) | -0.0038(5) |
| C5   | 0.0239(6)   | 0.0284(7) | 0.0262(6) | -0.0002(5) | -0.0012(5) | -0.0024(5) |
| C6   | 0.0210(6)   | 0.0277(7) | 0.0264(7) | 0.0030(5)  | -0.0019(5) | -0.0029(5) |
| C7   | 0.0202(6)   | 0.0304(7) | 0.0279(7) | 0.0034(5)  | -0.0020(5) | -0.0050(5) |
| C8   | 0.0201(6)   | 0.0323(7) | 0.0261(7) | 0.0018(6)  | 0.0002(5)  | -0.0028(5) |

|     |            |           |           |            |            |            |
|-----|------------|-----------|-----------|------------|------------|------------|
| C9  | 0.0237(7)  | 0.0380(8) | 0.0294(7) | -0.0028(6) | 0.0010(5)  | 0.0041(6)  |
| C10 | 0.0295(7)  | 0.0333(7) | 0.0226(6) | -0.0065(6) | 0.0018(5)  | -0.0004(6) |
| C11 | 0.0273(7)  | 0.0333(7) | 0.0226(6) | -0.0056(6) | 0.0000(5)  | -0.0026(6) |
| C12 | 0.0282(7)  | 0.0421(9) | 0.0312(7) | -0.0081(6) | 0.0016(6)  | -0.0055(6) |
| C13 | 0.0395(9)  | 0.0432(9) | 0.0329(8) | -0.0100(7) | 0.0054(6)  | -0.0140(7) |
| C14 | 0.0555(10) | 0.0321(8) | 0.0334(8) | -0.0074(6) | 0.0080(7)  | -0.0096(7) |
| C15 | 0.0427(9)  | 0.0343(8) | 0.0296(7) | -0.0065(6) | 0.0028(6)  | 0.0040(7)  |
| C16 | 0.0238(7)  | 0.0350(8) | 0.0312(7) | 0.0046(6)  | -0.0023(5) | 0.0004(6)  |
| C17 | 0.0302(7)  | 0.0402(8) | 0.0311(7) | 0.0036(6)  | -0.0104(6) | -0.0059(6) |
| C18 | 0.0357(8)  | 0.0336(8) | 0.0347(8) | -0.0051(6) | -0.0076(6) | -0.0071(6) |
| C19 | 0.0280(7)  | 0.0278(7) | 0.0386(8) | -0.0008(6) | -0.0042(6) | -0.0026(6) |
| C20 | 0.0285(7)  | 0.0294(7) | 0.0323(7) | 0.0018(6)  | 0.0012(6)  | -0.0030(6) |
| C21 | 0.0278(7)  | 0.0278(7) | 0.0472(9) | -0.0004(6) | 0.0016(6)  | 0.0005(6)  |

=====

The Temperature Factor has the Form of  $\text{Exp}(-T)$  Where  
 $T = 8 \cdot (\text{Pi}^2) \cdot U \cdot (\text{Sin}(\text{Theta}) / \text{Lambda})^2$  for Isotropic Atoms  
 $T = 2 \cdot (\text{Pi}^2) \cdot \text{Sum}_{ij} (h(i) \cdot h(j) \cdot U(i,j) \cdot \text{Astar}(i) \cdot \text{Astar}(j))$ , for  
Anisotropic Atoms.  $\text{Astar}(i)$  are Reciprocal Axial Lengths and  
 $h(i)$  are the Reflection Indices.

Table S5 - Bond Distances (Angstrom)

for: **2b**      P 21/n      R = 0.04

|     |      |            |     |      |          |
|-----|------|------------|-----|------|----------|
| C11 | -C1  | 1.7460(16) | C14 | -C15 | 1.391(2) |
| N1  | -C5  | 1.4830(18) | C16 | -C17 | 1.384(2) |
| N1  | -C6  | 1.4649(18) | C17 | -C18 | 1.381(2) |
| N1  | -C11 | 1.4355(19) | C18 | -C19 | 1.393(2) |
| C1  | -C2  | 1.381(2)   | C20 | -C21 | 1.388(2) |
| C1  | -C21 | 1.382(2)   | C2  | -H2  | 0.9500   |
| C2  | -C3  | 1.383(2)   | C3  | -H3  | 0.9500   |
| C3  | -C4  | 1.395(2)   | C5  | -H5  | 1.0000   |
| C4  | -C5  | 1.4870(19) | C6  | -H6  | 1.0000   |
| C4  | -C20 | 1.393(2)   | C9  | -H9A | 0.9900   |
| C5  | -C6  | 1.4996(18) | C9  | -H9B | 0.9900   |
| C6  | -C7  | 1.4799(19) | C12 | -H12 | 0.9500   |
| C7  | -C8  | 1.399(2)   | C13 | -H13 | 0.9500   |
| C7  | -C19 | 1.394(2)   | C14 | -H14 | 0.9500   |
| C8  | -C9  | 1.514(2)   | C15 | -H15 | 0.9500   |

|     |      |            |     |      |        |
|-----|------|------------|-----|------|--------|
| C8  | -C16 | 1.3968(19) | C16 | -H16 | 0.9500 |
| C9  | -C10 | 1.513(2)   | C17 | -H17 | 0.9500 |
| C10 | -C11 | 1.402(2)   | C18 | -H18 | 0.9500 |
| C10 | -C15 | 1.393(2)   | C19 | -H19 | 0.9500 |
| C11 | -C12 | 1.397(2)   | C20 | -H20 | 0.9500 |
| C12 | -C13 | 1.386(2)   | C21 | -H21 | 0.9500 |
| C13 | -C14 | 1.384(2)   |     |      |        |

Table S6 - Bond Angles (Degrees)

for: 2b

P 21/n

R = 0.04

|     |      |      |            |     |      |      |            |
|-----|------|------|------------|-----|------|------|------------|
| C5  | -N1  | -C6  | 61.15(9)   | N1  | -C11 | -C12 | 118.16(13) |
| C5  | -N1  | -C11 | 119.16(11) | C10 | -C11 | -C12 | 119.84(14) |
| C6  | -N1  | -C11 | 122.42(11) | C11 | -C12 | -C13 | 120.47(14) |
| C11 | -C1  | -C2  | 118.63(13) | C12 | -C13 | -C14 | 120.16(15) |
| C11 | -C1  | -C21 | 119.54(12) | C13 | -C14 | -C15 | 119.51(15) |
| C2  | -C1  | -C21 | 121.83(14) | C10 | -C15 | -C14 | 121.35(15) |
| C1  | -C2  | -C3  | 118.80(15) | C8  | -C16 | -C17 | 121.01(14) |
| C2  | -C3  | -C4  | 121.11(14) | C16 | -C17 | -C18 | 120.19(14) |
| C3  | -C4  | -C5  | 121.72(13) | C17 | -C18 | -C19 | 119.69(14) |
| C3  | -C4  | -C20 | 118.54(13) | C7  | -C19 | -C18 | 120.38(13) |
| C5  | -C4  | -C20 | 119.74(13) | C4  | -C20 | -C21 | 121.07(14) |
| N1  | -C5  | -C4  | 119.28(12) | C1  | -C21 | -C20 | 118.64(14) |
| N1  | -C5  | -C6  | 58.83(9)   | C1  | -C2  | -H2  | 121.00     |
| C4  | -C5  | -C6  | 122.12(12) | C3  | -C2  | -H2  | 121.00     |
| N1  | -C6  | -C5  | 60.02(9)   | C2  | -C3  | -H3  | 119.00     |
| N1  | -C6  | -C7  | 124.23(12) | C4  | -C3  | -H3  | 119.00     |
| C5  | -C6  | -C7  | 121.70(12) | N1  | -C5  | -H5  | 115.00     |
| C6  | -C7  | -C8  | 120.74(12) | C4  | -C5  | -H5  | 115.00     |
| C6  | -C7  | -C19 | 119.03(12) | C6  | -C5  | -H5  | 115.00     |
| C8  | -C7  | -C19 | 119.99(13) | N1  | -C6  | -H6  | 114.00     |
| C7  | -C8  | -C9  | 120.04(12) | C5  | -C6  | -H6  | 114.00     |
| C7  | -C8  | -C16 | 118.75(13) | C7  | -C6  | -H6  | 114.00     |
| C9  | -C8  | -C16 | 121.22(13) | C8  | -C9  | -H9A | 109.00     |
| C8  | -C9  | -C10 | 111.21(11) | C8  | -C9  | -H9B | 109.00     |
| C9  | -C10 | -C11 | 120.03(13) | C10 | -C9  | -H9A | 109.00     |
| C9  | -C10 | -C15 | 121.32(13) | C10 | -C9  | -H9B | 109.00     |

|     |      |      |            |     |      |      |        |
|-----|------|------|------------|-----|------|------|--------|
| C11 | -C10 | -C15 | 118.65(13) | H9A | -C9  | -H9B | 108.00 |
| N1  | -C11 | -C10 | 121.68(12) | C11 | -C12 | -H12 | 120.00 |
| C13 | -C12 | -H12 | 120.00     | C18 | -C17 | -H17 | 120.00 |
| C12 | -C13 | -H13 | 120.00     | C17 | -C18 | -H18 | 120.00 |
| C14 | -C13 | -H13 | 120.00     | C19 | -C18 | -H18 | 120.00 |
| C13 | -C14 | -H14 | 120.00     | C7  | -C19 | -H19 | 120.00 |
| C15 | -C14 | -H14 | 120.00     | C18 | -C19 | -H19 | 120.00 |
| C10 | -C15 | -H15 | 119.00     | C4  | -C20 | -H20 | 120.00 |
| C14 | -C15 | -H15 | 119.00     | C21 | -C20 | -H20 | 119.00 |
| C8  | -C16 | -H16 | 120.00     | C1  | -C21 | -H21 | 121.00 |
| C17 | -C16 | -H16 | 119.00     | C20 | -C21 | -H21 | 121.00 |
| C16 | -C17 | -H17 | 120.00     |     |      |      |        |

Table S7 - Torsion Angles (Degrees)

for: **2b**

P 21/n

R = 0.04

|     |     |      |      |             |
|-----|-----|------|------|-------------|
| C6  | -N1 | -C5  | -C4  | 111.92(14)  |
| C11 | -N1 | -C5  | -C4  | -134.90(13) |
| C11 | -N1 | -C5  | -C6  | 113.18(13)  |
| C5  | -N1 | -C6  | -C7  | 109.96(15)  |
| C11 | -N1 | -C6  | -C5  | -108.00(13) |
| C11 | -N1 | -C6  | -C7  | 1.96(19)    |
| C5  | -N1 | -C11 | -C10 | -121.02(14) |
| C5  | -N1 | -C11 | -C12 | 65.42(17)   |
| C6  | -N1 | -C11 | -C10 | -48.49(19)  |
| C6  | -N1 | -C11 | -C12 | 137.95(14)  |
| C11 | -C1 | -C2  | -C3  | -179.29(12) |
| C21 | -C1 | -C2  | -C3  | 0.5(2)      |
| C11 | -C1 | -C21 | -C20 | 179.77(12)  |
| C2  | -C1 | -C21 | -C20 | 0.0(2)      |
| C1  | -C2 | -C3  | -C4  | -0.4(2)     |
| C2  | -C3 | -C4  | -C5  | 179.66(14)  |
| C2  | -C3 | -C4  | -C20 | -0.2(2)     |
| C3  | -C4 | -C5  | -N1  | -29.76(19)  |
| C3  | -C4 | -C5  | -C6  | 39.8(2)     |
| C20 | -C4 | -C5  | -N1  | 150.10(13)  |
| C20 | -C4 | -C5  | -C6  | -140.30(14) |

|     |      |      |      |             |
|-----|------|------|------|-------------|
| C3  | -C4  | -C20 | -C21 | 0.7(2)      |
| C5  | -C4  | -C20 | -C21 | -179.17(13) |
| N1  | -C5  | -C6  | -C7  | -114.01(14) |
| C4  | -C5  | -C6  | -N1  | -107.17(14) |
| C4  | -C5  | -C6  | -C7  | 138.82(14)  |
| N1  | -C6  | -C7  | -C8  | 45.34(19)   |
| N1  | -C6  | -C7  | -C19 | -140.38(14) |
| C5  | -C6  | -C7  | -C8  | 118.47(15)  |
| C5  | -C6  | -C7  | -C19 | -67.25(18)  |
| C6  | -C7  | -C8  | -C9  | -6.4(2)     |
| C6  | -C7  | -C8  | -C16 | 174.10(13)  |
| C19 | -C7  | -C8  | -C9  | 179.41(13)  |
| C19 | -C7  | -C8  | -C16 | -0.1(2)     |
| C6  | -C7  | -C19 | -C18 | -174.55(13) |
| C8  | -C7  | -C19 | -C18 | -0.2(2)     |
| C7  | -C8  | -C9  | -C10 | -64.32(17)  |
| C16 | -C8  | -C9  | -C10 | 115.20(14)  |
| C7  | -C8  | -C16 | -C17 | 0.3(2)      |
| C9  | -C8  | -C16 | -C17 | -179.27(13) |
| C8  | -C9  | -C10 | -C11 | 64.90(17)   |
| C8  | -C9  | -C10 | -C15 | -113.68(15) |
| C9  | -C10 | -C11 | -N1  | 7.9(2)      |
| C9  | -C10 | -C11 | -C12 | -178.62(13) |
| C15 | -C10 | -C11 | -N1  | -173.46(13) |
| C15 | -C10 | -C11 | -C12 | 0.0(2)      |
| C9  | -C10 | -C15 | -C14 | 179.43(14)  |
| C11 | -C10 | -C15 | -C14 | 0.8(2)      |
| N1  | -C11 | -C12 | -C13 | 173.00(13)  |
| C10 | -C11 | -C12 | -C13 | -0.7(2)     |
| C11 | -C12 | -C13 | -C14 | 0.6(2)      |
| C12 | -C13 | -C14 | -C15 | 0.3(2)      |
| C13 | -C14 | -C15 | -C10 | -1.0(2)     |
| C8  | -C16 | -C17 | -C18 | 0.0(2)      |
| C16 | -C17 | -C18 | -C19 | -0.3(2)     |
| C17 | -C18 | -C19 | -C7  | 0.4(2)      |



C4      -C20      -C21      -C1                      -0.6(2)

Table S8 - Contact Distances(Angstrom)  
for: **2b**                      P 21/n                      R = 0.04

|     |        |            |     |        |        |
|-----|--------|------------|-----|--------|--------|
| C11 | .C20_a | 3.5611(15) | C7  | .H2_e  | 3.0900 |
| C11 | .C18_b | 3.6097(16) | C8  | .H2_e  | 2.8300 |
| C11 | .H12_a | 2.9200     | C12 | .H5    | 3.0200 |
| C11 | .H18_b | 2.8900     | C13 | .H9A_f | 3.0500 |
| N1  | .H3    | 2.7200     | C13 | .H5_g  | 2.9000 |
| N1  | .H9A   | 2.7700     | C13 | .H20_g | 3.0600 |
| N1  | .H17_c | 2.8000     | C14 | .H20_g | 2.9000 |
| C1  | .C21_a | 3.536(2)   | C14 | .H5_g  | 3.0100 |
| C2  | .C8_e  | 3.508(2)   | C14 | .H9A_f | 2.8300 |
| C3  | .C17_c | 3.514(2)   | C15 | .H20_g | 2.9300 |
| C3  | .C16_c | 3.568(2)   | C15 | .H9A_f | 2.9000 |
| C8  | .C2_e  | 3.508(2)   | C16 | .H21_g | 2.9800 |
| C10 | .C10_f | 3.467(2)   | C16 | .H2_e  | 2.9500 |
| C16 | .C3_h  | 3.568(2)   | C17 | .H21_g | 2.9200 |
| C17 | .C3_h  | 3.514(2)   | C17 | .H9B_i | 3.0600 |
| C18 | .C11_j | 3.6097(16) | C18 | .H9B_i | 2.9800 |
| C20 | .C11_a | 3.5611(15) | C18 | .H21_g | 3.0700 |
| C21 | .C1_a  | 3.536(2)   | C19 | .H13_k | 3.0600 |
| C1  | .H13_d | 3.0500     | C21 | .H13_d | 2.8500 |
| C2  | .H16_c | 3.0400     | H2  | .C7_e  | 3.0900 |
| C3  | .H17_c | 2.9700     | H2  | .C8_e  | 2.8300 |
| C3  | .H6_e  | 3.0200     | H2  | .C16_e | 2.9500 |
| C3  | .H6    | 2.8200     | H3  | .N1    | 2.7200 |
| C3  | .H16_c | 3.0700     | H3  | .C6    | 2.8800 |
| C5  | .H19   | 3.1000     | H3  | .H6    | 2.4200 |
| C5  | .H12   | 2.9600     | H3  | .H6_e  | 2.4300 |
| C6  | .H9A   | 2.7700     | H5  | .C12   | 3.0200 |
| C6  | .H3    | 2.8800     | H5  | .H20   | 2.4000 |

|     |        |        |     |        |        |
|-----|--------|--------|-----|--------|--------|
| H5  | .C13_k | 2.9000 | H13 | .C1_m  | 3.0500 |
| H5  | .C14_k | 3.0100 | H13 | .C21_m | 2.8500 |
| H6  | .C3    | 2.8200 | H13 | .C19_g | 3.0600 |
| H6  | .H3    | 2.4200 | H15 | .H9B   | 2.3700 |
| H6  | .C3_e  | 3.0200 | H16 | .H9B   | 2.3700 |
| H6  | .H3_e  | 2.4300 | H16 | .C2_h  | 3.0400 |
| H6  | .H6_e  | 2.5200 | H16 | .C3_h  | 3.0700 |
| H9A | .N1    | 2.7700 | H17 | .N1_h  | 2.8000 |
| H9A | .C6    | 2.7700 | H17 | .C3_h  | 2.9700 |
| H9A | .C13_f | 3.0500 | H18 | .C11_j | 2.8900 |
| H9A | .C14_f | 2.8300 | H19 | .C5    | 3.1000 |
| H9A | .C15_f | 2.9000 | H20 | .H5    | 2.4000 |
| H9B | .H15   | 2.3700 | H20 | .C13_k | 3.0600 |
| H9B | .H16   | 2.3700 | H20 | .C14_k | 2.9000 |
| H9B | .C17_l | 3.0600 | H20 | .C15_k | 2.9300 |
| H9B | .C18_l | 2.9800 | H21 | .C16_k | 2.9800 |
| H12 | .C5    | 2.9600 | H21 | .C17_k | 2.9200 |
| H12 | .C11_a | 2.9200 | H21 | .C18_k | 3.0700 |

#### Translation of Symmetry Code to Equiv.Pos

```

a =[ 3566.00 ] = -x,1-y,1-z
b =[ 4464.00 ] = -1/2+x,3/2-y,-1/2+z
c =[ 4454.00 ] = -1/2+x,1/2-y,-1/2+z
d =[ 1565.00 ] = x,1+y,z
e =[ 3666.00 ] = 1-x,1-y,1-z
f =[ 3656.00 ] = 1-x,-y,1-z
g =[ 2546.00 ] = 1/2-x,-1/2+y,3/2-z
h =[ 4555.00 ] = 1/2+x,1/2-y,1/2+z
i =[ 2656.00 ] = 3/2-x,1/2+y,3/2-z
j =[ 4565.00 ] = 1/2+x,3/2-y,1/2+z
k =[ 2556.00 ] = 1/2-x,1/2+y,3/2-z
l =[ 2646.00 ] = 3/2-x,-1/2+y,3/2-z
m =[ 1545.00 ] = x,-1+

```

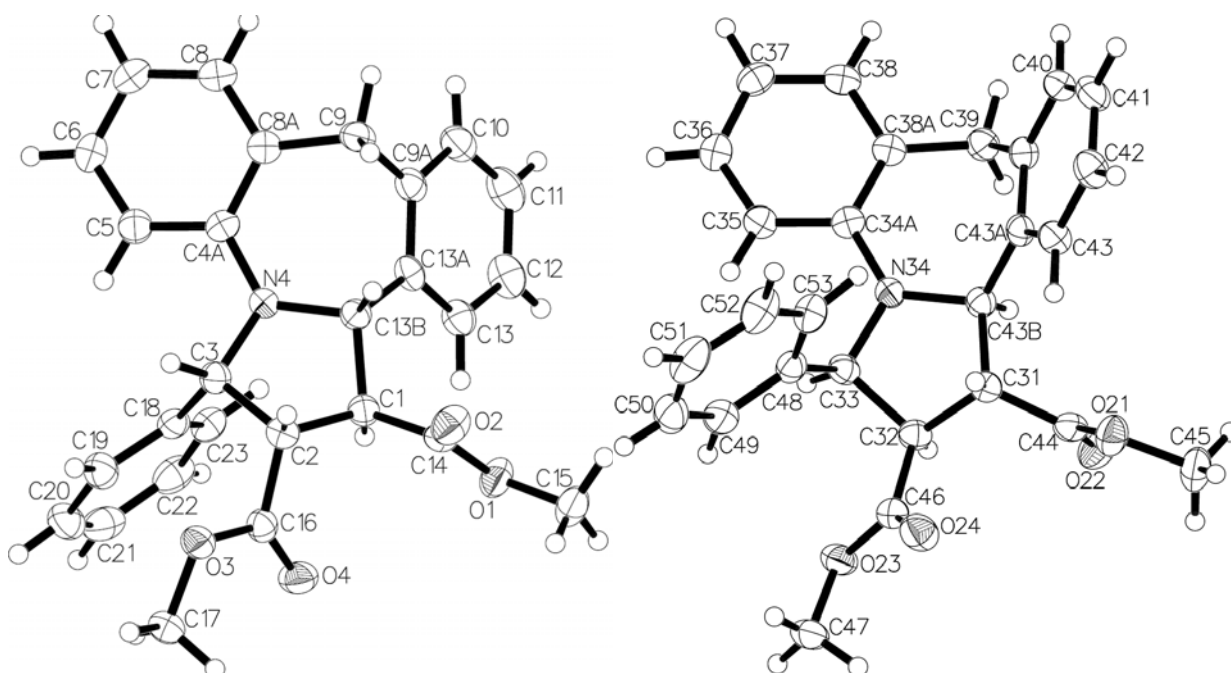

X-Ray crystal structures of **13**.

**Table 1:** Crystal data and structure refinement for **13**

|                                              |                                          |
|----------------------------------------------|------------------------------------------|
| Identification code                          | dax16                                    |
| Empirical formula                            | $C_{27}H_{25}NO_4$                       |
| Formula weight                               | 427.48                                   |
| Temperature / K                              | 120.0                                    |
| Crystal system                               | Monoclinic                               |
| Space group                                  | $P2_1/n$                                 |
| a / Å, b / Å, c / Å                          | 10.0710(2), 25.9843(5), 17.0032(3)       |
| $\alpha/^\circ, \beta/^\circ, \gamma/^\circ$ | 90.00, 104.460(10), 90.00                |
| Volume / Å <sup>3</sup>                      | 4308.58(14)                              |
| Z                                            | 8                                        |
| $\rho_{\text{calc}} / \text{mg mm}^{-3}$     | 1.318                                    |
| $\mu / \text{mm}^{-1}$                       | 0.088                                    |
| F(000)                                       | 1808                                     |
| Crystal size / mm <sup>3</sup>               | 0.3 × 0.28 × 0.14                        |
| Theta range for data collection              | 1.57 to 29.00°                           |
| Index ranges                                 | -13 ≤ h ≤ 13, -35 ≤ k ≤ 35, -23 ≤ l ≤ 23 |
| Reflections collected                        | 52462                                    |

|                                             |                                                   |
|---------------------------------------------|---------------------------------------------------|
| Independent reflections                     | 11451[R(int) = 0.0702]                            |
| Data/restraints/parameters                  | 11451/0/777                                       |
| Goodness-of-fit on F <sup>2</sup>           | 0.988                                             |
| Final R indexes [I>2σ (I)]                  | R <sub>1</sub> = 0.0458, wR <sub>2</sub> = 0.0851 |
| Final R indexes [all data]                  | R <sub>1</sub> = 0.0965, wR <sub>2</sub> = 0.0949 |
| Largest diff. peak/hole / e Å <sup>-3</sup> | 0.265/-0.222                                      |

Table 2 Atomic Coordinates (Å×10<sup>4</sup>) and Equivalent Isotropic Displacement Parameters (Å<sup>2</sup>×10<sup>3</sup>) for **13**. U<sub>eq</sub> is defined as 1/3 of the trace of the orthogonalised U<sub>ij</sub> tensor.

| Atom | x           | y         | z          | U(eq)   |
|------|-------------|-----------|------------|---------|
| O1   | 5406.6(11)  | 5601.7(4) | 3550.3(7)  | 38.2(3) |
| O2   | 6539.1(12)  | 4908.8(4) | 4152.1(7)  | 39.2(3) |
| O3   | 10595.5(10) | 5564.9(4) | 4130.2(6)  | 32.5(3) |
| O4   | 8746.7(11)  | 6078.3(4) | 3755.7(7)  | 37.7(3) |
| N4   | 7986.2(12)  | 4781.2(5) | 2027.8(7)  | 28.0(3) |
| C1   | 7086.6(15)  | 5251.3(6) | 2957.5(9)  | 25.8(3) |
| C2   | 8621.9(15)  | 5198.7(6) | 3293.7(9)  | 26.6(3) |
| C3   | 9144.7(16)  | 5066.6(6) | 2533.4(9)  | 27.1(4) |
| C4A  | 8224.5(15)  | 4422.1(6) | 1463.7(9)  | 26.0(3) |
| C5   | 9433.0(17)  | 4465.5(6) | 1197.6(10) | 30.2(4) |
| C6   | 9708.2(17)  | 4138.9(6) | 616.4(10)  | 32.7(4) |
| C7   | 8790.6(17)  | 3756.2(6) | 279.5(10)  | 32.3(4) |
| C8   | 7609.9(17)  | 3705.7(6) | 545.5(10)  | 30.6(4) |
| C8A  | 7298.8(15)  | 4023.3(6) | 1130.3(9)  | 27.1(3) |
| C9   | 5972.7(17)  | 3924.0(6) | 1368.2(10) | 30.6(4) |
| C9A  | 5045.3(16)  | 4387.1(6) | 1228.5(9)  | 29.8(4) |
| C10  | 3840.7(17)  | 4395.7(7) | 610(1)     | 35.6(4) |
| C11  | 3013.3(19)  | 4828.2(8) | 488.2(11)  | 41.6(5) |
| C12  | 3374.1(18)  | 5252.6(7) | 984.9(11)  | 40.0(4) |
| C13  | 4579.9(16)  | 5251.1(6) | 1592.9(10) | 32.4(4) |
| C13A | 5434.9(15)  | 4822.2(6) | 1717.0(9)  | 27.3(3) |
| C13B | 6764.7(15)  | 4794.4(6) | 2368.7(9)  | 25.1(3) |
| C14  | 6332.2(16)  | 5226.7(6) | 3620.3(10) | 29.2(4) |
| C15  | 4641(2)     | 5607.5(9) | 4169.6(14) | 45.5(5) |
| C16  | 9295.5(16)  | 5668.2(6) | 3742.6(9)  | 27.8(4) |
| C17  | 11390.1(19) | 6000.1(7) | 4510.4(12) | 37.0(4) |
| C18  | 9548.5(16)  | 5544.9(6) | 2135.1(9)  | 27.8(3) |
| C19  | 10892.8(18) | 5722.2(7) | 2379.9(10) | 35.2(4) |
| C20  | 11268(2)    | 6187.9(7) | 2101.5(11) | 43.2(5) |
| C21  | 10302(2)    | 6474.5(7) | 1563.5(11) | 44.5(5) |
| C22  | 8968(2)     | 6295.8(7) | 1283.5(11) | 39.7(4) |
| C23  | 8592.3(18)  | 5831.2(6) | 1570.8(10) | 32.0(4) |
| O21  | 4291.5(11)  | 2308.7(4) | 875.6(7)   | 36.8(3) |
| O22  | 3258.8(12)  | 3003.6(4) | 216.0(7)   | 40.5(3) |
| O23  | -890.1(11)  | 2314.0(4) | 246.4(7)   | 37.4(3) |

|      |             |           |            |         |
|------|-------------|-----------|------------|---------|
| O24  | 1006.6(11)  | 1837.8(4) | 712.8(7)   | 40.0(3) |
| N34  | 1604.0(12)  | 3249.2(5) | 2207.4(7)  | 27.4(3) |
| C31  | 2582.6(15)  | 2703.9(6) | 1397.0(9)  | 24.7(3) |
| C32  | 1043.6(15)  | 2736.9(6) | 1040.8(9)  | 26.5(3) |
| C33  | 508.2(16)   | 2908.2(6) | 1779.6(9)  | 26.2(3) |
| C34A | 1379.7(15)  | 3590.9(5) | 2793.0(9)  | 25.6(3) |
| C35  | 158.2(16)   | 3551.0(6) | 3051.7(9)  | 28.6(4) |
| C36  | -77.2(17)   | 3855.6(6) | 3665.7(10) | 31.7(4) |
| C37  | 877.5(17)   | 4210.4(6) | 4056.8(10) | 31.7(4) |
| C38  | 2052.7(17)  | 4271.8(6) | 3780.3(9)  | 29.4(4) |
| C38A | 2310.9(15)  | 3982.8(6) | 3146.4(9)  | 26.0(3) |
| C39  | 3606.7(17)  | 4090.3(6) | 2877(1)    | 29.2(4) |
| C39A | 4559.8(15)  | 3636.6(6) | 3044.8(9)  | 27.6(4) |
| C40  | 5747.7(16)  | 3645.6(7) | 3666.2(10) | 31.2(4) |
| C41  | 6577.8(17)  | 3212.3(7) | 3844.5(10) | 34.8(4) |
| C42  | 6226.9(17)  | 2769.5(7) | 3397.2(11) | 35.4(4) |
| C43  | 5028.4(16)  | 2752.7(6) | 2773.6(10) | 30.6(4) |
| C43A | 4179.8(15)  | 3181.8(6) | 2598.1(9)  | 25.7(3) |
| C43B | 2874.7(15)  | 3194.7(6) | 1920.7(9)  | 24.8(3) |
| C44  | 3392.8(16)  | 2697.9(6) | 758.9(10)  | 28.3(4) |
| C45  | 5175(2)     | 2287.4(8) | 319.8(14)  | 41.8(5) |
| C46  | 413.6(16)   | 2244.2(6) | 657.2(9)   | 29.9(4) |
| C47  | -1613(2)    | 1852.2(9) | -106.1(14) | 47.1(5) |
| C48  | 214.9(16)   | 2465.7(6) | 2300.3(9)  | 27.7(3) |
| C49  | -1082.3(18) | 2243.5(7) | 2123.4(11) | 36.5(4) |
| C50  | -1375(2)    | 1847.2(7) | 2604.3(13) | 46.4(5) |
| C51  | -386(2)     | 1677.3(7) | 3268.0(13) | 47.6(5) |
| C52  | 903(2)      | 1893.0(7) | 3443.8(12) | 44.6(5) |
| C53  | 1208.0(18)  | 2285.0(6) | 2965.7(10) | 34.2(4) |

Table 3 Anisotropic Displacement Parameters ( $\text{\AA}^2 \times 10^3$ ) for **13**. The Anisotropic displacement factor exponent takes the form:  $-2\pi^2[h^2a^*U_{11} + \dots + 2hkaxb \times U_{12}]$

| Atom | $U_{11}$ | $U_{22}$ | $U_{33}$ | $U_{23}$ | $U_{13}$ | $U_{12}$ |
|------|----------|----------|----------|----------|----------|----------|
| O1   | 36.0(7)  | 37.0(7)  | 46.0(7)  | 0.4(6)   | 18.4(6)  | 8.1(5)   |
| O2   | 49.5(8)  | 34.3(7)  | 38.6(7)  | 4.9(6)   | 19.8(6)  | 4.6(6)   |
| O3   | 26.4(6)  | 34.7(6)  | 33.4(6)  | -5.4(5)  | 2.0(5)   | -1.3(5)  |
| O4   | 36.4(7)  | 29.7(6)  | 43.7(7)  | -7.2(5)  | 4.0(6)   | 3.0(5)   |
| N4   | 24.4(7)  | 29.0(7)  | 31.6(7)  | -6.5(6)  | 9.0(6)   | -4.1(6)  |
| C1   | 26.5(9)  | 22.2(8)  | 28.9(8)  | 1.1(7)   | 7.2(7)   | 0.5(7)   |
| C2   | 27.2(9)  | 25.5(8)  | 26.2(8)  | 0.7(7)   | 4.8(7)   | -0.5(7)  |
| C3   | 24.2(9)  | 27.1(8)  | 29.1(9)  | -0.5(7)  | 4.7(7)   | 1.2(7)   |
| C4A  | 29.6(9)  | 23.8(8)  | 23.9(8)  | 2.2(7)   | 5.6(7)   | 3.9(7)   |
| C5   | 30.7(9)  | 27.3(9)  | 33.1(9)  | 1.9(7)   | 8.7(8)   | 1.0(7)   |
| C6   | 30.9(10) | 36(1)    | 33.7(9)  | 4.2(8)   | 12.7(8)  | 6.0(8)   |
| C7   | 38.4(10) | 31.3(9)  | 27.3(9)  | -0.8(8)  | 8.2(8)   | 7.9(8)   |
| C8   | 37.1(10) | 27.0(9)  | 26.3(8)  | 0.4(7)   | 5.2(8)   | 1.4(7)   |
| C8A  | 30.4(9)  | 25.7(8)  | 24.6(8)  | 3.2(7)   | 5.5(7)   | 0.9(7)   |
| C9   | 36.2(10) | 29.2(9)  | 27.2(9)  | -4.6(7)  | 9.5(8)   | -8.9(7)  |
| C9A  | 28.7(9)  | 34.1(9)  | 28.1(8)  | 0.2(7)   | 9.8(7)   | -6.7(7)  |

|      |          |          |          |           |          |           |
|------|----------|----------|----------|-----------|----------|-----------|
| C10  | 35.5(10) | 41.9(11) | 30.0(9)  | -2.7(8)   | 9.1(8)   | -10.6(8)  |
| C11  | 30(1)    | 56.2(12) | 33.6(10) | 9.2(9)    | -1.6(8)  | -6.2(9)   |
| C12  | 33(1)    | 41.0(11) | 43.4(11) | 11.1(9)   | 5.0(9)   | 1.5(9)    |
| C13  | 29.9(9)  | 31.6(9)  | 35.6(9)  | 3.9(8)    | 8.1(8)   | -2.1(7)   |
| C13A | 23.7(8)  | 31.3(9)  | 26.7(8)  | 4.1(7)    | 6.2(7)   | -4.1(7)   |
| C13B | 26.4(8)  | 23.4(8)  | 26.2(8)  | 0.9(7)    | 7.7(7)   | -0.9(6)   |
| C14  | 28.6(9)  | 24.5(8)  | 34.0(9)  | -6.1(7)   | 6.9(7)   | -3.2(7)   |
| C15  | 43.1(12) | 43.5(12) | 58.8(14) | -7.7(11)  | 29.5(11) | 2.1(10)   |
| C16  | 26.3(9)  | 32.3(9)  | 25.5(8)  | -0.2(7)   | 7.7(7)   | -1.6(7)   |
| C17  | 30.7(10) | 41.8(11) | 36.2(10) | -10.6(9)  | 3.9(9)   | -6.9(8)   |
| C18  | 31.5(9)  | 28.0(8)  | 26.1(8)  | -4.3(7)   | 11.1(7)  | -1.9(7)   |
| C19  | 33.9(10) | 41(1)    | 32.1(9)  | -2.3(8)   | 10.9(8)  | -5.8(8)   |
| C20  | 46.6(12) | 47.2(11) | 40.5(11) | -8.9(9)   | 19.7(10) | -18(1)    |
| C21  | 70.5(15) | 30.3(10) | 41.7(11) | -4.9(9)   | 31.0(11) | -8.8(10)  |
| C22  | 56.6(13) | 34.5(10) | 32.8(10) | 2.0(8)    | 20.2(10) | 6.7(9)    |
| C23  | 36.2(10) | 33.2(9)  | 29.1(9)  | -1.4(7)   | 12.6(8)  | 3.2(8)    |
| O21  | 35.4(7)  | 34.2(6)  | 45.5(7)  | -0.3(6)   | 19.1(6)  | 4.9(5)    |
| O22  | 49.2(8)  | 41.6(7)  | 33.9(7)  | 6.0(6)    | 16.3(6)  | 6.4(6)    |
| O23  | 28.0(6)  | 43.1(7)  | 37.6(7)  | -12.2(6)  | 1.6(5)   | -2.0(5)   |
| O24  | 35.1(7)  | 31.8(7)  | 52.1(8)  | -8.7(6)   | 8.6(6)   | -0.4(5)   |
| N34  | 23.5(7)  | 28.9(7)  | 30.5(7)  | -5.8(6)   | 8.1(6)   | -3.1(5)   |
| C31  | 25.4(8)  | 23.4(8)  | 25.2(8)  | 0.9(7)    | 5.8(7)   | -0.2(6)   |
| C32  | 26.6(8)  | 26.6(8)  | 24.5(8)  | 0.4(7)    | 3.1(7)   | 1.3(7)    |
| C33  | 22.1(8)  | 27.0(8)  | 27.4(8)  | -1.3(7)   | 2.3(7)   | 1.1(7)    |
| C34A | 29.2(9)  | 22.6(8)  | 24.4(8)  | 2.9(7)    | 5.7(7)   | 1.8(6)    |
| C35  | 28.6(9)  | 25.7(9)  | 30.6(9)  | -0.1(7)   | 5.7(7)   | 1.0(7)    |
| C36  | 31.7(9)  | 31.5(9)  | 33.9(9)  | 3.3(7)    | 11.8(8)  | 3.1(7)    |
| C37  | 39.2(10) | 28.6(9)  | 28.0(9)  | -0.6(7)   | 9.3(8)   | 6.6(7)    |
| C38  | 32.4(9)  | 24.7(8)  | 27.8(9)  | -0.8(7)   | 1.3(8)   | -0.2(7)   |
| C38A | 26.9(8)  | 23.4(8)  | 26.2(8)  | 2.9(7)    | 3.6(7)   | 3.0(6)    |
| C39  | 32.6(9)  | 24.8(9)  | 30.7(9)  | -1.3(7)   | 9.1(8)   | -4.3(7)   |
| C39A | 27.2(9)  | 29.1(9)  | 28.3(8)  | 1.0(7)    | 10.3(7)  | -4.5(7)   |
| C40  | 29.8(9)  | 33.6(9)  | 30.5(9)  | -6.2(8)   | 7.9(8)   | -9.1(7)   |
| C41  | 24.6(9)  | 41.8(10) | 34.6(10) | 0.3(8)    | 1.1(8)   | -4.9(8)   |
| C42  | 27.5(9)  | 35.4(10) | 41.1(10) | 2.3(8)    | 4.9(8)   | 2.9(8)    |
| C43  | 28.1(9)  | 30.0(9)  | 33.0(9)  | -0.7(8)   | 6.6(8)   | -2.2(7)   |
| C43A | 24.1(8)  | 28.2(8)  | 26.0(8)  | 1.9(7)    | 8.6(7)   | -3.8(6)   |
| C43B | 24.9(8)  | 24.3(8)  | 25.6(8)  | 0.5(7)    | 7.0(7)   | -1.1(6)   |
| C44  | 30.2(9)  | 24.9(8)  | 28.4(8)  | -5.3(7)   | 4.6(7)   | -2.3(7)   |
| C45  | 38.8(11) | 40.0(11) | 55.0(13) | -2(1)     | 27.1(11) | 0.4(9)    |
| C46  | 26.8(9)  | 35.4(9)  | 27.2(8)  | -4.9(7)   | 6.0(7)   | -1.1(7)   |
| C47  | 31.2(11) | 56.6(13) | 50.9(13) | -29.7(11) | 5.4(10)  | -7.4(10)  |
| C48  | 30.0(9)  | 25.7(8)  | 29.9(9)  | -2.6(7)   | 12.0(7)  | 0.3(7)    |
| C49  | 38.3(11) | 36.9(10) | 36.1(10) | -4.8(8)   | 12.2(9)  | -6.3(8)   |
| C50  | 49.8(13) | 40.2(11) | 57.6(13) | -13(1)    | 29.3(11) | -17.1(10) |
| C51  | 71.0(15) | 30.3(10) | 52.9(12) | 4.5(9)    | 36.9(12) | 3.1(10)   |
| C52  | 51.5(13) | 45.8(12) | 41.9(11) | 12.3(9)   | 21.9(10) | 17.5(10)  |
| C53  | 34(1)    | 35.8(10) | 35.4(10) | 3.7(8)    | 13.3(8)  | 5.4(8)    |

Table 4 Bond Lengths for **13**.

| Atom | Atom | Length/Å   | Atom | Atom | Length/Å   |
|------|------|------------|------|------|------------|
| O1   | C14  | 1.3332(18) | O21  | C44  | 1.3384(18) |
| O1   | C15  | 1.452(2)   | O21  | C45  | 1.453(2)   |
| O2   | C14  | 1.2038(18) | O22  | C44  | 1.1996(17) |
| O3   | C16  | 1.3378(17) | O23  | C46  | 1.3367(18) |
| O3   | C17  | 1.4418(19) | O23  | C47  | 1.453(2)   |
| O4   | C16  | 1.2032(17) | O24  | C46  | 1.2052(18) |
| N4   | C3   | 1.4661(19) | N34  | C33  | 1.4598(18) |
| N4   | C4A  | 1.4011(18) | N34  | C34A | 1.3941(18) |
| N4   | C13B | 1.4854(18) | N34  | C43B | 1.4854(18) |
| C1   | C2   | 1.515(2)   | C31  | C32  | 1.519(2)   |
| C1   | C13B | 1.535(2)   | C31  | C43B | 1.541(2)   |
| C1   | C14  | 1.510(2)   | C31  | C44  | 1.512(2)   |
| C2   | C3   | 1.551(2)   | C32  | C33  | 1.551(2)   |
| C2   | C16  | 1.507(2)   | C32  | C46  | 1.503(2)   |
| C3   | C18  | 1.518(2)   | C33  | C48  | 1.525(2)   |
| C4A  | C5   | 1.405(2)   | C34A | C35  | 1.410(2)   |
| C4A  | C8A  | 1.414(2)   | C34A | C38A | 1.413(2)   |
| C5   | C6   | 1.382(2)   | C35  | C36  | 1.377(2)   |
| C6   | C7   | 1.381(2)   | C36  | C37  | 1.377(2)   |
| C7   | C8   | 1.380(2)   | C37  | C38  | 1.387(2)   |
| C8   | C8A  | 1.387(2)   | C38  | C38A | 1.390(2)   |
| C8A  | C9   | 1.511(2)   | C38A | C39  | 1.513(2)   |
| C9   | C9A  | 1.505(2)   | C39  | C39A | 1.502(2)   |
| C9A  | C10  | 1.393(2)   | C39A | C40  | 1.384(2)   |
| C9A  | C13A | 1.400(2)   | C39A | C43A | 1.405(2)   |
| C10  | C11  | 1.383(2)   | C40  | C41  | 1.390(2)   |
| C11  | C12  | 1.381(3)   | C41  | C42  | 1.376(2)   |
| C12  | C13  | 1.384(2)   | C42  | C43  | 1.394(2)   |
| C13  | C13A | 1.392(2)   | C43  | C43A | 1.391(2)   |
| C13A | C13B | 1.512(2)   | C43A | C43B | 1.516(2)   |
| C18  | C19  | 1.392(2)   | C48  | C49  | 1.391(2)   |
| C18  | C23  | 1.393(2)   | C48  | C53  | 1.391(2)   |
| C19  | C20  | 1.386(2)   | C49  | C50  | 1.392(2)   |
| C20  | C21  | 1.376(3)   | C50  | C51  | 1.378(3)   |
| C21  | C22  | 1.389(3)   | C51  | C52  | 1.377(3)   |
| C22  | C23  | 1.390(2)   | C52  | C53  | 1.384(2)   |

Table 5 Bond Angles for **13**.

| Atom | Atom | Atom | Angle/°    | Atom | Atom | Atom | Angle/°    |
|------|------|------|------------|------|------|------|------------|
| O1   | C14  | C1   | 111.93(14) | O21  | C44  | C31  | 111.57(13) |
| O2   | C14  | O1   | 123.68(15) | O22  | C44  | O21  | 123.80(14) |
| O2   | C14  | C1   | 124.39(14) | O22  | C44  | C31  | 124.62(14) |
| O3   | C16  | C2   | 110.39(13) | O23  | C46  | C32  | 111.36(13) |
| O4   | C16  | O3   | 124.48(14) | O24  | C46  | O23  | 124.24(15) |
| O4   | C16  | C2   | 125.13(14) | O24  | C46  | C32  | 124.40(15) |
| N4   | C3   | C2   | 102.39(12) | N34  | C33  | C32  | 101.84(12) |
| N4   | C3   | C18  | 114.52(13) | N34  | C33  | C48  | 113.60(12) |

|      |      |      |            |      |      |      |            |
|------|------|------|------------|------|------|------|------------|
| N4   | C4A  | C5   | 118.51(14) | N34  | C34A | C35  | 119.06(14) |
| N4   | C4A  | C8A  | 123.63(13) | N34  | C34A | C38A | 123.64(13) |
| N4   | C13B | C1   | 102.23(12) | N34  | C43B | C31  | 102.28(11) |
| N4   | C13B | C13A | 112.54(12) | N34  | C43B | C43A | 114.03(12) |
| C1   | C2   | C3   | 103.43(12) | C31  | C32  | C33  | 102.70(12) |
| C2   | C1   | C13B | 101.88(12) | C32  | C31  | C43B | 102.25(12) |
| C3   | N4   | C13B | 112.01(11) | C33  | N34  | C43B | 112.63(11) |
| C4A  | N4   | C3   | 119.41(12) | C34A | N34  | C33  | 120.35(12) |
| C4A  | N4   | C13B | 125.63(12) | C34A | N34  | C43B | 126.99(12) |
| C4A  | C8A  | C9   | 123.77(14) | C34A | C38A | C39  | 122.37(14) |
| C5   | C4A  | C8A  | 117.84(14) | C35  | C34A | C38A | 117.29(14) |
| C6   | C5   | C4A  | 121.70(16) | C35  | C36  | C37  | 121.28(16) |
| C7   | C6   | C5   | 120.39(16) | C36  | C35  | C34A | 121.54(15) |
| C7   | C8   | C8A  | 123.09(16) | C36  | C37  | C38  | 117.71(15) |
| C8   | C7   | C6   | 118.33(16) | C37  | C38  | C38A | 122.76(15) |
| C8   | C8A  | C4A  | 118.62(14) | C38  | C38A | C34A | 119.08(14) |
| C8   | C8A  | C9   | 117.60(14) | C38  | C38A | C39  | 118.52(14) |
| C9A  | C9   | C8A  | 112.11(13) | C39A | C39  | C38A | 110.87(13) |
| C9A  | C13A | C13B | 117.52(14) | C39A | C40  | C41  | 120.73(16) |
| C10  | C9A  | C9   | 121.40(15) | C39A | C43A | C43B | 117.35(13) |
| C10  | C9A  | C13A | 119.81(15) | C40  | C39A | C39  | 121.42(15) |
| C11  | C10  | C9A  | 120.29(17) | C40  | C39A | C43A | 119.56(15) |
| C11  | C12  | C13  | 120.14(18) | C41  | C42  | C43  | 120.05(16) |
| C12  | C11  | C10  | 120.02(17) | C42  | C41  | C40  | 119.95(16) |
| C12  | C13  | C13A | 120.63(17) | C43  | C43A | C39A | 119.24(14) |
| C13  | C13A | C9A  | 119.06(15) | C43  | C43A | C43B | 123.37(14) |
| C13  | C13A | C13B | 123.41(14) | C43A | C39A | C39  | 118.85(14) |
| C13A | C9A  | C9   | 118.76(14) | C43A | C43  | C42  | 120.44(15) |
| C13A | C13B | C1   | 116.44(13) | C43A | C43B | C31  | 115.14(13) |
| C14  | O1   | C15  | 115.39(14) | C44  | O21  | C45  | 115.74(14) |
| C14  | C1   | C2   | 111.78(13) | C44  | C31  | C32  | 113.22(12) |
| C14  | C1   | C13B | 112.99(12) | C44  | C31  | C43B | 111.35(12) |
| C16  | O3   | C17  | 115.40(13) | C46  | O23  | C47  | 115.42(14) |
| C16  | C2   | C1   | 113.95(13) | C46  | C32  | C31  | 113.76(13) |
| C16  | C2   | C3   | 113.42(13) | C46  | C32  | C33  | 113.66(13) |
| C18  | C3   | C2   | 112.03(12) | C48  | C33  | C32  | 114.27(12) |
| C19  | C18  | C3   | 119.11(14) | C48  | C49  | C50  | 120.37(18) |
| C19  | C18  | C23  | 118.86(15) | C49  | C48  | C33  | 119.68(14) |
| C20  | C19  | C18  | 120.99(17) | C49  | C48  | C53  | 118.79(16) |
| C20  | C21  | C22  | 120.66(18) | C51  | C50  | C49  | 120.15(19) |
| C21  | C20  | C19  | 119.47(18) | C51  | C52  | C53  | 120.47(19) |
| C21  | C22  | C23  | 119.67(18) | C52  | C51  | C50  | 119.80(18) |
| C22  | C23  | C18  | 120.27(17) | C52  | C53  | C48  | 120.40(17) |
| C23  | C18  | C3   | 121.89(14) | C53  | C48  | C33  | 121.51(14) |

Table 6 Hydrogen Atom Coordinates ( $\text{\AA}\times 10^4$ ) and Isotropic Displacement Parameters ( $\text{\AA}^2\times 10^3$ ) for **13**.

| Atom | x        | y       | z       | U(eq) |
|------|----------|---------|---------|-------|
| H1   | 6883(13) | 5566(5) | 2676(8) | 19(4) |
| H2   | 8816(14) | 4904(5) | 3673(8) | 23(4) |
| H3   | 9966(14) | 4849(5) | 2693(8) | 19(4) |



|      |           |         |          |       |
|------|-----------|---------|----------|-------|
| H5   | 10109(14) | 4742(5) | 1414(8)  | 24(4) |
| H6   | 10562(15) | 4180(5) | 463(9)   | 29(4) |
| H7   | 8943(16)  | 3524(6) | -128(9)  | 38(5) |
| H8   | 6945(15)  | 3432(6) | 325(9)   | 35(4) |
| H9A  | 5498(15)  | 3632(6) | 1022(9)  | 36(4) |
| H9B  | 6180(14)  | 3802(5) | 1933(9)  | 28(4) |
| H10  | 3625(14)  | 4112(5) | 267(9)   | 21(4) |
| H11  | 2207(17)  | 4836(6) | 59(10)   | 45(5) |
| H12  | 2807(17)  | 5542(7) | 932(10)  | 48(5) |
| H13  | 4828(15)  | 5552(6) | 1955(9)  | 35(5) |
| H13A | 6733(13)  | 4486(5) | 2713(8)  | 21(4) |
| H15A | 4079(19)  | 5294(7) | 4123(11) | 60(6) |
| H15B | 5300.0(2) | 5632(8) | 4703(14) | 84(8) |
| H15C | 4170.0(2) | 5928(8) | 4066(12) | 66(6) |
| H17A | 12243(18) | 5840(6) | 4877(10) | 49(5) |
| H17B | 10870(18) | 6201(7) | 4846(11) | 57(6) |
| H17C | 11585(16) | 6219(6) | 4069(10) | 46(5) |
| H19  | 11585(16) | 5508(6) | 2766(10) | 41(5) |
| H20  | 12191(18) | 6297(6) | 2309(10) | 49(5) |
| H21  | 10580(17) | 6808(7) | 1358(10) | 49(5) |
| H22  | 8248(17)  | 6488(6) | 877(10)  | 43(5) |
| H23  | 7640(16)  | 5696(6) | 1374(9)  | 37(5) |
| H31  | 2792(13)  | 2388(5) | 1736(8)  | 21(4) |
| H32  | 808(15)   | 3009(6) | 637(9)   | 30(4) |
| H33  | -360(14)  | 3106(5) | 1576(8)  | 19(4) |
| H35  | -529(14)  | 3300(5) | 2803(8)  | 19(4) |
| H36  | -947(16)  | 3817(6) | 3795(9)  | 33(4) |
| H37  | 749(15)   | 4426(6) | 4506(9)  | 34(4) |
| H38  | 2721(14)  | 4524(5) | 4026(8)  | 24(4) |
| H39A | 3403(14)  | 4191(5) | 2316(9)  | 24(4) |
| H39B | 4068(15)  | 4405(6) | 3170(9)  | 29(4) |
| H40  | 5975(15)  | 3951(6) | 3968(9)  | 33(4) |
| H41  | 7374(16)  | 3219(5) | 4278(9)  | 32(4) |
| H42  | 6823(15)  | 2456(6) | 3522(9)  | 34(4) |
| H43  | 4779(16)  | 2427(6) | 245(1)   | 39(5) |
| H43A | 2910(14)  | 3482(5) | 1540(9)  | 28(4) |
| H45A | 5733(19)  | 1966(7) | 476(11)  | 61(6) |
| H45B | 4627(19)  | 2302(7) | -243(12) | 58(6) |
| H45C | 5737(17)  | 2600(7) | 378(10)  | 49(5) |
| H47A | -1081(18) | 1685(7) | -442(11) | 55(6) |
| H47B | -1719(19) | 1626(8) | 356(12)  | 67(7) |
| H47C | -2503(19) | 1983(7) | -443(11) | 54(6) |
| H49  | -1781(16) | 2382(6) | 1655(10) | 39(5) |
| H50  | -2250(18) | 1718(6) | 2481(10) | 49(5) |
| H51  | -613(17)  | 1404(7) | 3612(10) | 54(6) |
| H52  | 1607(18)  | 1779(7) | 3910(11) | 53(6) |
| H53  | 2111(16)  | 2452(6) | 3114(9)  | 33(4) |

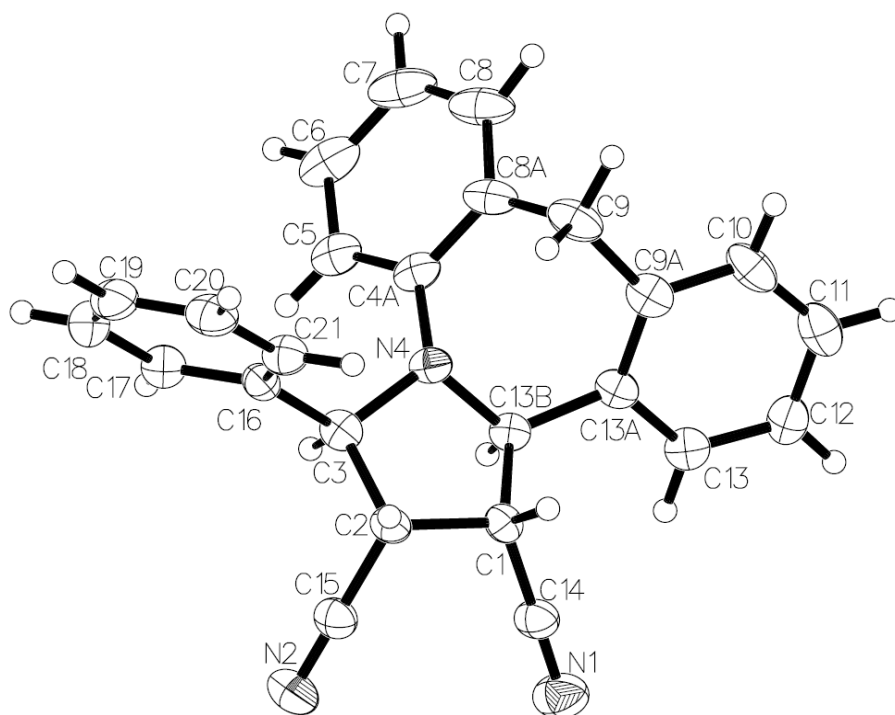

X-Ray crystal structures of **16**.

**Table 1:** Crystal data and structure refinement for **16**

|                                                    |                                                              |
|----------------------------------------------------|--------------------------------------------------------------|
| Identification code                                | dax17                                                        |
| Empirical formula                                  | $C_{25}H_{19}N_3 \times 0.125 CH_2Cl_2$                      |
| Formula weight                                     | 366.74                                                       |
| Temperature / K                                    | -153                                                         |
| Crystal system                                     | Monoclinic                                                   |
| Space group                                        | $C2/c$                                                       |
| $a / \text{\AA}, b / \text{\AA}, c / \text{\AA}$   | 36.9379(14), 28.7704(11), 15.8020(6)                         |
| $\alpha / ^\circ, \beta / ^\circ, \gamma / ^\circ$ | 90.00, 113.740(10), 90.00                                    |
| Volume / $\text{\AA}^3$                            | 15372.1(10)                                                  |
| Z                                                  | 32                                                           |
| $\rho_{\text{calc}} / \text{mg mm}^{-3}$           | 1.268                                                        |
| $\mu / \text{mm}^{-1}$                             | 0.092                                                        |
| F(000)                                             | 6164                                                         |
| Crystal size / $\text{mm}^3$                       | $0.24 \times 0.16 \times 0.14$                               |
| Theta range for data collection                    | 1.42 to $27.00^\circ$                                        |
| Index ranges                                       | $-47 \leq h \leq 47, -36 \leq k \leq 36, -20 \leq l \leq 20$ |
| Reflections collected                              | 69184                                                        |

|                                             |                                                   |
|---------------------------------------------|---------------------------------------------------|
| Independent reflections                     | 16751[R(int) = 0.1100]                            |
| Data/restraints/parameters                  | 16751/0/1021                                      |
| Goodness-of-fit on F <sup>2</sup>           | 0.950                                             |
| Final R indexes [I>2σ (I)]                  | R <sub>1</sub> = 0.0606, wR <sub>2</sub> = 0.1357 |
| Final R indexes [all data]                  | R <sub>1</sub> = 0.1394, wR <sub>2</sub> = 0.1546 |
| Largest diff. peak/hole / e Å <sup>-3</sup> | 0.876/-0.242                                      |

Table 2 Atomic Coordinates (Å×10<sup>4</sup>) and Equivalent Isotropic Displacement Parameters (Å<sup>2</sup>×10<sup>3</sup>) for **16**. U<sub>eq</sub> is defined as 1/3 of of the trace of the orthogonalised U<sub>ij</sub> tensor.

| Atom | x          | y          | z          | U(eq)   |
|------|------------|------------|------------|---------|
| N1   | 7189.5(8)  | 3494.1(10) | 6528(2)    | 49.8(8) |
| N2   | 6157.4(8)  | 3630.8(9)  | 6141.8(19) | 43.5(7) |
| N4   | 6713.4(6)  | 5026.2(7)  | 5715.9(16) | 26.6(5) |
| C1   | 6987.9(8)  | 4360.2(9)  | 6568.8(19) | 26.9(6) |
| C2   | 6552.1(8)  | 4410.5(9)  | 6463.2(19) | 26.6(6) |
| C3   | 6363.1(8)  | 4771(1)    | 5678(2)    | 28.9(7) |
| C4A  | 6662.8(8)  | 5369.9(10) | 5017(2)    | 29.6(7) |
| C5   | 6346.1(9)  | 5370.5(10) | 4158(2)    | 34.9(7) |
| C6   | 6322(1)    | 5716.5(12) | 3521(2)    | 46.8(9) |
| C7   | 6610.8(11) | 6052.3(12) | 3734(3)    | 49.5(9) |
| C8   | 6922.9(11) | 6046.3(11) | 4583(3)    | 47.2(9) |
| C8A  | 6954.6(9)  | 5712.6(10) | 5240(2)    | 33.3(7) |
| C9   | 7288.6(9)  | 5693.5(10) | 6172(2)    | 38.9(8) |
| C9A  | 7567.0(8)  | 5295.3(10) | 6230.9(19) | 31.4(7) |
| C10  | 7962.9(9)  | 5389.7(11) | 6423(2)    | 38.5(8) |
| C11  | 8220.0(9)  | 5047.0(12) | 6405(2)    | 38.7(8) |
| C12  | 8083.7(8)  | 4598.1(11) | 6159(2)    | 35.4(7) |
| C13  | 7693.1(8)  | 4496.5(10) | 5958.8(19) | 29.9(7) |
| C13A | 7429.3(8)  | 4836.2(10) | 6005.4(19) | 27.4(6) |
| C13B | 7012.1(7)  | 4667.5(9)  | 5789.9(19) | 26.9(6) |
| C14  | 7105.2(8)  | 3878.6(11) | 6543(2)    | 32.9(7) |
| C15  | 6330.0(8)  | 3974.2(10) | 6274(2)    | 31.7(7) |
| C16  | 6062.3(8)  | 5078.9(9)  | 5830(2)    | 27.3(6) |
| C17  | 5681.5(9)  | 5111.8(10) | 5165(2)    | 37.1(7) |
| C18  | 5401.1(9)  | 5389.6(11) | 5323(3)    | 46.4(9) |
| C19  | 5510.2(10) | 5621.6(10) | 6159(3)    | 44.6(9) |
| C20  | 5890.1(9)  | 5586.9(10) | 6817(2)    | 40.3(8) |
| C21  | 6165.2(8)  | 5322.3(10) | 6657(2)    | 31.8(7) |
| N21  | 5482.3(9)  | 4068.6(10) | 3563(2)    | 59.9(9) |
| N22  | 6529.5(9)  | 3856.8(10) | 4083(2)    | 53.8(8) |
| N34  | 5871.4(6)  | 2516.2(7)  | 4372.5(15) | 25.3(5) |
| C31  | 5654.7(8)  | 3192.0(9)  | 3514(2)    | 30.8(7) |
| C32  | 6098.9(8)  | 3106.4(9)  | 3706(2)    | 29.4(7) |
| C33  | 6244.4(8)  | 2750.9(9)  | 4516(2)    | 28.1(6) |
| C34A | 5883.4(8)  | 2162.5(9)  | 5016(2)    | 26.2(6) |
| C35  | 6187.5(8)  | 2116.4(10) | 5883(2)    | 28.8(7) |
| C36  | 6182.5(9)  | 1752.8(10) | 6458(2)    | 33.1(7) |
| C37  | 5866.6(9)  | 1445.8(10) | 6177(2)    | 34.7(7) |
| C38  | 5560.5(9)  | 1494.9(9)  | 5315(2)    | 32.4(7) |

|      |            |             |             |          |
|------|------------|-------------|-------------|----------|
| C38A | 5565.5(8)  | 1845.0(9)   | 4717(2)     | 28.2(6)  |
| C39  | 5247.2(8)  | 1908.1(9)   | 3757(2)     | 30.7(7)  |
| C39A | 4993.2(8)  | 2323.5(10)  | 3721.6(19)  | 27.4(6)  |
| C40  | 4591.3(8)  | 2261.6(10)  | 3519.6(19)  | 32.0(7)  |
| C41  | 4354.3(8)  | 2621.8(11)  | 3565(2)     | 32.4(7)  |
| C42  | 4513.0(8)  | 3060.2(11)  | 3829(2)     | 33.6(7)  |
| C43  | 4912.4(8)  | 3128.3(10)  | 4046.9(19)  | 30.0(7)  |
| C43A | 5155.7(8)  | 2768.2(9)   | 3991.7(19)  | 26.3(6)  |
| C43B | 5587.4(8)  | 2894.5(9)   | 4257.8(19)  | 25.6(6)  |
| C44  | 5553.7(9)  | 3685.0(11)  | 3531(2)     | 39.1(8)  |
| C45  | 6340.9(9)  | 3529.0(11)  | 3922(2)     | 36.3(7)  |
| C46  | 6564.3(8)  | 2433.1(9)   | 4495(2)     | 29.2(7)  |
| C47  | 6510.7(9)  | 2163.2(10)  | 3725(2)     | 35.3(7)  |
| C48  | 6814.7(10) | 1879.0(11)  | 3713(3)     | 46.9(9)  |
| C49  | 7169.2(10) | 1859.6(11)  | 4471(3)     | 50.2(10) |
| C50  | 7226.3(9)  | 2125.6(11)  | 5245(3)     | 45.3(9)  |
| C51  | 6925.0(8)  | 2413.7(10)  | 5250(2)     | 36.1(7)  |
| CI1A | 5395(1)    | 5406.1(13)  | 2316(3)     | 40.1(10) |
| CI1B | 5350.5(10) | 5341.9(13)  | 2552(3)     | 35.9(9)  |
| C1SB | 5067(3)    | 5076(3)     | 2421(9)     | 21(2)    |
| N31  | 5230.9(9)  | 1227.1(10)  | 8757(2)     | 55.7(8)  |
| N32  | 6193.0(8)  | 960.1(9)    | 8634(2)     | 48.8(7)  |
| N64  | 6061.8(6)  | 2518.8(7)   | 9268.8(16)  | 25.7(5)  |
| C61  | 5590.5(8)  | 1952.3(9)   | 8469.7(19)  | 27.1(6)  |
| C62  | 5995.7(8)  | 1836.1(9)   | 8427(2)     | 28.3(6)  |
| C63  | 6304.5(8)  | 2132.5(9)   | 9197(2)     | 26.6(6)  |
| C64A | 6251.3(8)  | 2838.4(9)   | 10016.3(19) | 25.7(6)  |
| C65  | 6569.3(8)  | 2728.2(10)  | 10818(2)    | 34.5(7)  |
| C66  | 6725.7(9)  | 3061.5(11)  | 11510(2)    | 43.0(8)  |
| C67  | 6559.4(10) | 3496.6(12)  | 11399(2)    | 45.2(9)  |
| C68  | 6245.5(9)  | 3612.7(11)  | 10586(2)    | 38.2(8)  |
| C68A | 6086.8(8)  | 3288.6(10)  | 9877(2)     | 29.9(7)  |
| C69  | 5746.3(8)  | 3394.3(10)  | 8979(2)     | 34.1(7)  |
| C69A | 5366.4(8)  | 3147.3(10)  | 8864(2)     | 30.9(7)  |
| C70  | 5023.8(9)  | 3413.0(11)  | 8631(2)     | 40.6(8)  |
| C71  | 4669.3(9)  | 3222.2(12)  | 8535(2)     | 43.1(8)  |
| C72  | 4649.1(9)  | 2753.2(12)  | 8698(2)     | 40.3(8)  |
| C73  | 4987.2(8)  | 2481.2(11)  | 8940(2)     | 33.8(7)  |
| C73A | 5346.8(8)  | 2671.4(10)  | 9012.7(18)  | 27.0(6)  |
| C73B | 5687.7(7)  | 2326.3(9)   | 9236.4(19)  | 26.9(6)  |
| C74  | 5389.8(9)  | 1543.9(11)  | 8635(2)     | 35.7(7)  |
| C75  | 6102.6(9)  | 1346.5(11)  | 8539(2)     | 36.2(7)  |
| C76  | 6637.8(8)  | 2286.0(9)   | 8930(2)     | 28.4(6)  |
| C77  | 6994.9(9)  | 2054.9(12)  | 9263(2)     | 46.1(9)  |
| C78  | 7291.9(10) | 2179.7(13)  | 8978(3)     | 59.2(11) |
| C79  | 7227.3(9)  | 2535.3(12)  | 8347(3)     | 49.0(9)  |
| C80  | 6870.6(9)  | 2766.6(10)  | 8004(2)     | 39.6(8)  |
| C81  | 6574.4(9)  | 2640.2(10)  | 8294(2)     | 35.4(7)  |
| N41  | 7086.5(9)  | -1402.9(10) | 6223(2)     | 57.3(8)  |
| N42  | 6121.3(8)  | -1580.7(9)  | 6304(2)     | 53.4(8)  |
| N94  | 6356.1(6)  | -33.3(7)    | 5739.5(15)  | 24.2(5)  |
| C91  | 6778.5(7)  | -641.5(9)   | 6536.0(19)  | 25.6(6)  |
| C92  | 6359.3(7)  | -718.0(9)   | 6524(2)     | 26.2(6)  |
| C93  | 6079.3(7)  | -400.6(9)   | 5739.8(19)  | 23.8(6)  |
| C94A | 6212.1(7)  | 315.7(9)    | 5033.2(19)  | 23.8(6)  |

|      |           |             |            |         |
|------|-----------|-------------|------------|---------|
| C95  | 5912.2(8) | 243(1)      | 4167(2)    | 29.6(7) |
| C96  | 5802.5(8) | 604.4(10)   | 3517(2)    | 31.5(7) |
| C97  | 5987.0(8) | 1029.5(10)  | 3741(2)    | 32.8(7) |
| C98  | 6286.5(8) | 1100.1(10)  | 4605(2)    | 30.1(7) |
| C98A | 6401.3(8) | 750.4(9)    | 5260.6(19) | 26.5(6) |
| C99  | 6737.9(8) | 801.9(9)    | 6189.2(19) | 28.3(7) |
| C99A | 7096.4(8) | 525.2(10)   | 6238.5(19) | 26.9(6) |
| C100 | 7450.5(8) | 761.7(10)   | 6441(2)    | 32.8(7) |
| C101 | 7786.0(8) | 540.1(11)   | 6455(2)    | 34.6(7) |
| C102 | 7772.5(8) | 71.6(11)    | 6261(2)    | 32.7(7) |
| C103 | 7421.6(7) | -168.5(10)  | 6045.5(19) | 28.1(6) |
| C104 | 7081.7(7) | 50.0(9)     | 6040.6(18) | 25.4(6) |
| C105 | 6719.7(7) | -263.2(9)   | 5796.8(19) | 24.4(6) |
| C106 | 6955.5(8) | -1065.2(11) | 6368(2)    | 35.1(7) |
| C107 | 6223.7(8) | -1203.0(11) | 6407(2)    | 36.1(7) |
| C108 | 5740.9(7) | -229.5(9)   | 5949.8(19) | 24.3(6) |
| C109 | 5395.1(8) | -493.1(10)  | 5684(2)    | 29.7(7) |
| C110 | 5093.0(8) | -357.2(10)  | 5938(2)    | 31.6(7) |
| C111 | 5128.3(8) | 42.2(10)    | 6448.7(19) | 30.0(7) |
| C112 | 5468.7(8) | 306.7(10)   | 6713(2)    | 30.9(7) |
| C113 | 5775.6(8) | 170.7(9)    | 6475.4(19) | 28.4(6) |

Table 3 Anisotropic Displacement Parameters ( $\text{\AA}^2 \times 10^3$ ) for **16**. The Anisotropic displacement factor exponent takes the form:  $-2\pi^2[h^2a^*^2U_{11} + \dots + 2hkaxb \times U_{12}]$

| Atom | $U_{11}$ | $U_{22}$ | $U_{33}$ | $U_{23}$ | $U_{13}$ | $U_{12}$  |
|------|----------|----------|----------|----------|----------|-----------|
| N1   | 59.8(19) | 40.5(18) | 64(2)    | 10.3(15) | 40.0(16) | 7.4(14)   |
| N2   | 46.9(17) | 37.3(16) | 51.3(18) | -5.3(14) | 25.0(14) | -12.2(13) |
| N4   | 34.5(14) | 23.8(13) | 28.4(13) | 2.4(11)  | 19.9(11) | 3.3(10)   |
| C1   | 26.6(16) | 28.3(16) | 27.2(16) | -0.2(13) | 12.2(13) | -2.7(11)  |
| C2   | 30.5(16) | 23.9(15) | 29.3(16) | -1.3(13) | 16.0(13) | -2.3(11)  |
| C3   | 33.3(17) | 29.0(16) | 27.8(16) | -5.5(13) | 15.9(13) | -2.5(12)  |
| C4A  | 40.8(18) | 26.3(16) | 29.8(17) | 0.8(13)  | 22.7(14) | 9.4(13)   |
| C5   | 47.9(19) | 31.8(17) | 37.1(18) | 3.1(15)  | 29.6(16) | 10.8(14)  |
| C6   | 69(2)    | 47(2)    | 37(2)    | 11.0(17) | 34.9(18) | 26.4(18)  |
| C7   | 89(3)    | 30.2(19) | 50(2)    | 10.5(17) | 50(2)    | 16.5(18)  |
| C8   | 82(3)    | 24.3(17) | 57(2)    | -0.2(17) | 51(2)    | 1.6(16)   |
| C8A  | 56(2)    | 20.1(15) | 39.7(19) | -3.7(14) | 36.6(16) | -0.4(13)  |
| C9   | 55(2)    | 32.0(18) | 41(2)    | -7.6(15) | 31.7(17) | -12.2(14) |
| C9A  | 40.2(18) | 35.1(17) | 24.6(16) | -4.1(14) | 18.9(14) | -4.3(13)  |
| C10  | 45(2)    | 46(2)    | 32.2(18) | -7.7(16) | 24.3(15) | -18.9(15) |
| C11  | 35.3(18) | 59(2)    | 26.1(17) | -0.5(16) | 17.1(14) | -11.3(15) |
| C12  | 32.1(17) | 51(2)    | 27.6(17) | 9.2(15)  | 16.9(14) | 6.0(14)   |
| C13  | 37.1(18) | 32.9(17) | 23.6(15) | -1.2(13) | 16.2(13) | 0.5(13)   |
| C13A | 34.2(17) | 29.7(16) | 23.0(15) | -0.4(13) | 16.3(13) | -2.9(12)  |
| C13B | 31.0(16) | 25.9(15) | 25.0(15) | -1.9(13) | 12.6(13) | -0.6(12)  |
| C14  | 37.8(18) | 29.0(17) | 37.9(18) | 1.9(14)  | 21.7(15) | 0.3(13)   |
| C15  | 34.7(17) | 31.3(17) | 35.3(18) | -0.2(14) | 20.6(14) | -1.5(13)  |
| C16  | 25.7(16) | 25.2(15) | 32.8(17) | -0.8(13) | 13.6(13) | -2.5(11)  |
| C17  | 36.6(18) | 33.6(17) | 40.4(19) | 0.4(15)  | 14.6(15) | -0.2(13)  |
| C18  | 30.9(18) | 42(2)    | 65(3)    | 9.5(19)  | 17.7(17) | 2.6(14)   |
| C19  | 45(2)    | 30.0(18) | 72(3)    | 5.2(18)  | 37.6(19) | 6.8(14)   |
| C20  | 51(2)    | 29.4(18) | 50(2)    | -4.4(16) | 30.9(18) | -0.8(14)  |
| C21  | 38.5(17) | 27.9(16) | 33.7(17) | -1.6(14) | 19.4(14) | 1.3(13)   |
| N21  | 70(2)    | 33.6(17) | 92(3)    | 18.7(17) | 48.8(19) | 6.6(14)   |
| N22  | 65(2)    | 46.4(18) | 50.0(19) | 1.0(15)  | 23.2(16) | -25.5(15) |
| N34  | 27.6(13) | 23.2(12) | 28.9(13) | 1.3(10)  | 15.4(11) | -2.4(9)   |
| C31  | 32.4(17) | 28.4(16) | 32.8(17) | 1.5(14)  | 14.4(14) | -4.1(12)  |

|      |          |          |          |           |          |           |
|------|----------|----------|----------|-----------|----------|-----------|
| C32  | 34.9(17) | 27.0(16) | 30.8(17) | -3.4(13)  | 17.9(14) | -7.4(12)  |
| C33  | 33.6(16) | 25.7(15) | 30.2(16) | -7.6(13)  | 18.2(13) | -4.9(12)  |
| C34A | 33.0(16) | 21.4(15) | 32.9(17) | -2.9(13)  | 22.5(14) | 1.0(11)   |
| C35  | 33.8(17) | 28.1(16) | 31.2(17) | -0.8(13)  | 20.1(14) | 2.4(12)   |
| C36  | 45.3(19) | 31.0(17) | 30.9(17) | 1.0(14)   | 23.6(15) | 10.5(14)  |
| C37  | 54(2)    | 21.7(16) | 39.4(19) | 4.1(14)   | 30.5(17) | 6.0(14)   |
| C38  | 46.6(19) | 20.8(15) | 40.9(19) | -4.5(14)  | 29.0(16) | -2.8(13)  |
| C38A | 34.1(17) | 22.6(15) | 35.7(17) | -2.0(13)  | 22.1(14) | 0.1(12)   |
| C39  | 37.8(17) | 26.3(16) | 33.1(17) | -6.7(14)  | 19.6(14) | -8.2(12)  |
| C39A | 34.2(17) | 28.4(16) | 23.5(15) | -1.7(13)  | 15.5(13) | -0.4(12)  |
| C40  | 33.4(17) | 39.7(18) | 25.1(16) | -2.6(14)  | 14.0(13) | -8.0(13)  |
| C41  | 29.8(16) | 45.5(19) | 26.6(16) | 3.2(15)   | 16.2(13) | -0.4(14)  |
| C42  | 36.1(18) | 41.2(19) | 30.6(17) | 8.3(15)   | 20.8(14) | 8.4(14)   |
| C43  | 38.1(18) | 30.8(16) | 26.1(16) | 0.6(13)   | 18.1(14) | -0.1(13)  |
| C43A | 27.8(15) | 29.0(16) | 25.4(15) | 2.0(13)   | 14.1(13) | -1.0(12)  |
| C43B | 34.5(16) | 21.9(15) | 23.4(15) | -2.4(12)  | 14.7(13) | -3.4(12)  |
| C44  | 45(2)    | 31.7(19) | 49(2)    | 10.2(16)  | 27.5(17) | 0.7(14)   |
| C45  | 36.5(18) | 38.9(19) | 35.6(19) | 1.6(15)   | 16.6(15) | -6.9(14)  |
| C46  | 32.4(17) | 23.0(15) | 39.0(18) | -0.1(14)  | 21.5(14) | -5.1(12)  |
| C47  | 46.2(19) | 26.8(16) | 41.9(19) | -6.6(15)  | 26.9(16) | -7.7(13)  |
| C48  | 64(2)    | 30.2(18) | 66(3)    | -13.6(17) | 46(2)    | -6.0(16)  |
| C49  | 53(2)    | 29.9(19) | 85(3)    | -6.3(19)  | 46(2)    | 0.9(15)   |
| C50  | 38.0(19) | 36.3(19) | 67(3)    | 1.0(18)   | 26.1(18) | -1.6(14)  |
| C51  | 39.9(19) | 27.0(17) | 49(2)    | -4.2(15)  | 25.8(16) | -2.6(13)  |
| N31  | 71(2)    | 42.5(18) | 59(2)    | -4.3(16)  | 32.1(17) | -23.8(15) |
| N32  | 52.5(18) | 29.1(16) | 60(2)    | -4.1(14)  | 17.2(15) | -0.3(13)  |
| N64  | 27.6(13) | 23.7(12) | 30.8(13) | -4.1(11)  | 17.0(11) | -4.0(9)   |
| C61  | 33.2(16) | 25.1(15) | 24.1(15) | 2.4(13)   | 12.7(13) | -2.7(12)  |
| C62  | 38.6(17) | 23.7(15) | 26.6(16) | 0.7(13)   | 17.5(13) | -3.8(12)  |
| C63  | 35.1(16) | 20.3(14) | 28.6(16) | -0.6(13)  | 17.3(13) | 0.1(11)   |
| C64A | 29.0(16) | 26.3(15) | 28.2(16) | -6.3(13)  | 18.2(13) | -7.3(11)  |
| C65  | 35.0(18) | 31.9(17) | 39.4(19) | -8.0(15)  | 17.8(15) | -4.2(13)  |
| C66  | 38.4(19) | 49(2)    | 41(2)    | -10.3(17) | 15.7(16) | -9.4(15)  |
| C67  | 49(2)    | 43(2)    | 51(2)    | -24.6(18) | 28.3(19) | -20.4(16) |
| C68  | 46(2)    | 28.9(17) | 51(2)    | -9.1(15)  | 30.9(18) | -8.2(14)  |
| C68A | 34.0(17) | 25.6(16) | 39.1(18) | -3.8(14)  | 24.1(14) | -7.2(12)  |
| C69  | 42.7(19) | 24.1(16) | 44(2)    | 5.0(14)   | 26.2(16) | -0.3(13)  |
| C69A | 38.9(18) | 33.9(17) | 27.5(16) | 2.1(14)   | 21.5(14) | 0.9(13)   |
| C70  | 48(2)    | 43(2)    | 38.7(19) | 9.8(16)   | 26.5(16) | 10.6(15)  |
| C71  | 36.1(19) | 67(2)    | 30.8(18) | 9.2(17)   | 18.2(15) | 18.6(16)  |
| C72  | 30.3(18) | 68(2)    | 26.5(17) | -4.0(17)  | 15.2(14) | -4.2(15)  |
| C73  | 35.0(18) | 42.2(19) | 27.4(16) | -4.0(14)  | 15.8(14) | -5.6(14)  |
| C73A | 27.5(16) | 36.1(17) | 19.1(15) | -0.5(13)  | 11.0(12) | -1.7(12)  |
| C73B | 31.0(16) | 28.8(16) | 22.7(15) | -1.3(13)  | 12.8(12) | -8.2(12)  |
| C74  | 42.4(19) | 33.0(18) | 33.3(18) | -4.7(14)  | 17.0(15) | -11.5(14) |
| C75  | 39.8(19) | 31.2(18) | 37.9(19) | -4.8(15)  | 16.1(15) | -6.2(14)  |
| C76  | 32.5(17) | 24.7(15) | 32.3(17) | -2.3(13)  | 17.5(13) | -1.9(12)  |
| C77  | 44(2)    | 48(2)    | 54(2)    | 16.9(18)  | 27.7(18) | 7.0(15)   |
| C78  | 41(2)    | 68(3)    | 80(3)    | 19(2)     | 36(2)    | 12.9(18)  |
| C79  | 46(2)    | 50(2)    | 67(3)    | 2(2)      | 39.4(19) | -5.1(16)  |
| C80  | 49(2)    | 29.2(17) | 54(2)    | 4.8(16)   | 33.8(17) | -2.7(14)  |
| C81  | 42.0(18) | 26.9(16) | 47(2)    | -0.6(15)  | 28.5(16) | 1.5(13)   |
| N41  | 69(2)    | 43.8(18) | 71(2)    | 7.9(17)   | 41.2(18) | 21.4(15)  |
| N42  | 50.7(18) | 31.2(17) | 77(2)    | 8.4(16)   | 24.6(16) | -4.6(13)  |
| N94  | 27.3(13) | 22.2(12) | 27.7(13) | 3.3(10)   | 15.8(11) | 0.3(9)    |
| C91  | 26.1(15) | 26.7(15) | 25.2(15) | -0.9(13)  | 11.5(12) | 0.0(11)   |
| C92  | 31.2(16) | 23.3(15) | 29.7(16) | -3.8(13)  | 18.0(13) | -2.0(11)  |
| C93  | 25.9(15) | 23.5(15) | 24.1(15) | -2.3(12)  | 12.2(12) | -3.0(11)  |
| C94A | 22.5(14) | 25.7(15) | 26.5(15) | 3.6(13)   | 13.3(12) | 2.5(11)   |
| C95  | 30.1(16) | 26.2(16) | 36.0(17) | -2.1(14)  | 17.1(14) | -3.2(12)  |
| C96  | 34.4(17) | 31.5(17) | 29.9(17) | 4.4(14)   | 14.2(14) | 8.2(13)   |

|      |          |          |          |          |          |          |
|------|----------|----------|----------|----------|----------|----------|
| C97  | 40.7(18) | 29.2(17) | 33.8(18) | 7.2(14)  | 20.5(15) | 10.3(13) |
| C98  | 35.5(17) | 25.9(16) | 35.8(18) | 0.2(14)  | 21.6(14) | -1.0(12) |
| C98A | 29.8(16) | 27.5(16) | 29.8(16) | -3.3(13) | 20.0(13) | 0.8(12)  |
| C99  | 33.7(17) | 25.6(16) | 30.9(17) | -5.1(13) | 18.4(14) | -1.8(12) |
| C99A | 28.6(16) | 33.1(16) | 21.1(15) | -0.2(13) | 12.3(12) | -1.1(12) |
| C100 | 38.3(18) | 34.4(17) | 27.7(17) | -3.9(14) | 15.5(14) | -4.9(13) |
| C101 | 30.4(17) | 48(2)    | 27.2(17) | 0.2(15)  | 13.2(14) | -9.4(14) |
| C102 | 28.7(17) | 46.1(19) | 28.1(17) | 2.0(15)  | 16.3(13) | 1.5(13)  |
| C103 | 26.0(16) | 31.7(16) | 28.6(16) | 2.4(13)  | 13.1(13) | 1.6(12)  |
| C104 | 25.5(15) | 32.2(16) | 20.9(15) | -2.7(13) | 11.8(12) | -1.3(12) |
| C105 | 25.2(15) | 25.5(15) | 25.4(15) | 0.0(13)  | 13.3(12) | 1.7(11)  |
| C106 | 37.1(18) | 33.1(18) | 38.7(19) | 4.1(15)  | 19.1(15) | 7.0(14)  |
| C107 | 33.6(18) | 30.8(18) | 46(2)    | 6.8(16)  | 18.5(15) | 2.3(13)  |
| C108 | 27.0(15) | 22.0(14) | 26.2(15) | 0.3(12)  | 13.2(12) | -0.7(11) |
| C109 | 31.8(17) | 25.8(16) | 32.2(17) | -6.1(13) | 13.6(13) | -4.1(12) |
| C110 | 28.1(16) | 33.7(17) | 36.7(18) | -3.0(14) | 16.8(14) | -6.2(12) |
| C111 | 25.5(16) | 34.2(17) | 32.7(17) | -1.2(14) | 14.2(13) | 2.2(12)  |
| C112 | 31.8(17) | 26.3(16) | 37.4(18) | -3.1(14) | 16.7(14) | 0.7(12)  |
| C113 | 28.2(16) | 24.9(15) | 32.6(17) | -4.4(13) | 12.7(13) | -2.7(11) |

Table 4 Bond Lengths for **16**.

| Atom | Atom | Length/Å | Atom | Atom | Length/Å |
|------|------|----------|------|------|----------|
| N1   | C14  | 1.152(4) | N31  | C74  | 1.141(4) |
| N2   | C15  | 1.149(3) | N32  | C75  | 1.153(4) |
| N4   | C3   | 1.468(3) | N64  | C63  | 1.460(3) |
| N4   | C4A  | 1.438(3) | N64  | C64A | 1.437(3) |
| N4   | C13B | 1.481(3) | N64  | C73B | 1.470(3) |
| C1   | C2   | 1.557(3) | C61  | C62  | 1.562(4) |
| C1   | C13B | 1.547(4) | C61  | C73B | 1.551(4) |
| C1   | C14  | 1.457(4) | C61  | C74  | 1.468(4) |
| C2   | C3   | 1.551(4) | C62  | C63  | 1.547(4) |
| C2   | C15  | 1.463(4) | C62  | C75  | 1.454(4) |
| C3   | C16  | 1.514(4) | C63  | C76  | 1.519(4) |
| C4A  | C5   | 1.390(4) | C64A | C65  | 1.374(4) |
| C4A  | C8A  | 1.397(4) | C64A | C68A | 1.410(4) |
| C5   | C6   | 1.393(4) | C65  | C66  | 1.393(4) |
| C6   | C7   | 1.377(5) | C66  | C67  | 1.374(4) |
| C7   | C8   | 1.372(5) | C67  | C68  | 1.381(4) |
| C8   | C8A  | 1.385(4) | C68  | C68A | 1.392(4) |
| C8A  | C9   | 1.493(4) | C68A | C69  | 1.500(4) |
| C9   | C9A  | 1.517(4) | C69  | C69A | 1.517(4) |
| C9A  | C10  | 1.396(4) | C69A | C70  | 1.395(4) |
| C9A  | C13A | 1.409(4) | C69A | C73A | 1.396(4) |
| C10  | C11  | 1.377(4) | C70  | C71  | 1.371(4) |
| C11  | C12  | 1.384(4) | C71  | C72  | 1.381(4) |
| C12  | C13  | 1.378(4) | C72  | C73  | 1.391(4) |
| C13  | C13A | 1.403(4) | C73  | C73A | 1.398(4) |
| C13A | C13B | 1.518(4) | C73A | C73B | 1.529(4) |
| C16  | C17  | 1.379(4) | C76  | C77  | 1.378(4) |
| C16  | C21  | 1.394(4) | C76  | C81  | 1.384(4) |
| C17  | C18  | 1.408(4) | C77  | C78  | 1.390(4) |
| C18  | C19  | 1.387(5) | C78  | C79  | 1.381(5) |
| C19  | C20  | 1.373(4) | C79  | C80  | 1.378(4) |
| C20  | C21  | 1.372(4) | C80  | C81  | 1.394(4) |
| N21  | C44  | 1.140(4) | N41  | C106 | 1.149(4) |

|      |      |          |      |      |          |
|------|------|----------|------|------|----------|
| N22  | C45  | 1.139(4) | N42  | C107 | 1.141(4) |
| N34  | C33  | 1.467(3) | N94  | C93  | 1.471(3) |
| N34  | C34A | 1.427(3) | N94  | C94A | 1.435(3) |
| N34  | C43B | 1.471(3) | N94  | C105 | 1.467(3) |
| C31  | C32  | 1.563(4) | C91  | C92  | 1.556(3) |
| C31  | C43B | 1.553(4) | C91  | C105 | 1.547(4) |
| C31  | C44  | 1.470(4) | C91  | C106 | 1.457(4) |
| C32  | C33  | 1.554(4) | C92  | C93  | 1.551(4) |
| C32  | C45  | 1.466(4) | C92  | C107 | 1.469(4) |
| C33  | C46  | 1.505(4) | C93  | C108 | 1.500(3) |
| C34A | C35  | 1.385(4) | C94A | C95  | 1.387(4) |
| C34A | C38A | 1.411(4) | C94A | C98A | 1.407(4) |
| C35  | C36  | 1.390(4) | C95  | C96  | 1.401(4) |
| C36  | C37  | 1.386(4) | C96  | C97  | 1.375(4) |
| C37  | C38  | 1.383(4) | C97  | C98  | 1.383(4) |
| C38  | C38A | 1.386(4) | C98  | C98A | 1.382(4) |
| C38A | C39  | 1.510(4) | C98A | C99  | 1.501(4) |
| C39  | C39A | 1.506(4) | C99  | C99A | 1.520(4) |
| C39A | C40  | 1.399(4) | C99A | C100 | 1.393(4) |
| C39A | C43A | 1.405(4) | C99A | C104 | 1.399(4) |
| C40  | C41  | 1.377(4) | C100 | C101 | 1.386(4) |
| C41  | C42  | 1.383(4) | C101 | C102 | 1.379(4) |
| C42  | C43  | 1.387(4) | C102 | C103 | 1.385(4) |
| C43  | C43A | 1.397(4) | C103 | C104 | 1.401(4) |
| C43A | C43B | 1.520(4) | C104 | C105 | 1.528(4) |
| C46  | C47  | 1.389(4) | C108 | C109 | 1.397(4) |
| C46  | C51  | 1.386(4) | C108 | C113 | 1.395(4) |
| C47  | C48  | 1.396(4) | C109 | C110 | 1.385(4) |
| C48  | C49  | 1.374(5) | C110 | C111 | 1.380(4) |
| C49  | C50  | 1.386(5) | C111 | C112 | 1.383(4) |
| C50  | C51  | 1.390(4) | C112 | C113 | 1.386(4) |

Table 5 Bond Angles for **16**.

| Atom | Atom | Atom | Angle/°    | Atom | Atom | Atom | Angle/°  |
|------|------|------|------------|------|------|------|----------|
| N1   | C14  | C1   | 178.1(3)   | N31  | C74  | C61  | 179.4(4) |
| N2   | C15  | C2   | 179.0(3)   | N32  | C75  | C62  | 179.0(4) |
| N4   | C3   | C2   | 101.3(2)   | N64  | C63  | C62  | 101.5(2) |
| N4   | C3   | C16  | 113.1(2)   | N64  | C63  | C76  | 113.1(2) |
| N4   | C13B | C1   | 100.44(19) | N64  | C73B | C61  | 102.0(2) |
| N4   | C13B | C13A | 116.9(2)   | N64  | C73B | C73A | 116.0(2) |
| C3   | N4   | C13B | 105.7(2)   | C63  | N64  | C73B | 108.0(2) |
| C3   | C2   | C1   | 105.1(2)   | C63  | C62  | C61  | 105.3(2) |
| C4A  | N4   | C3   | 118.2(2)   | C64A | N64  | C63  | 116.1(2) |
| C4A  | N4   | C13B | 113.7(2)   | C64A | N64  | C73B | 114.2(2) |
| C4A  | C5   | C6   | 119.4(3)   | C64A | C65  | C66  | 119.7(3) |
| C4A  | C8A  | C9   | 118.1(3)   | C64A | C68A | C69  | 118.6(3) |
| C5   | C4A  | N4   | 123.3(3)   | C65  | C64A | N64  | 124.3(2) |
| C5   | C4A  | C8A  | 120.4(3)   | C65  | C64A | C68A | 120.7(3) |
| C7   | C6   | C5   | 120.5(3)   | C66  | C67  | C68  | 120.3(3) |
| C7   | C8   | C8A  | 121.7(3)   | C67  | C66  | C65  | 120.2(3) |
| C8   | C7   | C6   | 119.6(3)   | C67  | C68  | C68A | 120.7(3) |
| C8   | C8A  | C4A  | 118.4(3)   | C68  | C68A | C64A | 118.3(3) |
| C8   | C8A  | C9   | 123.5(3)   | C68  | C68A | C69  | 123.1(3) |



|      |      |      |          |      |      |      |            |
|------|------|------|----------|------|------|------|------------|
| C8A  | C4A  | N4   | 116.3(3) | C68A | C64A | N64  | 115.0(2)   |
| C8A  | C9   | C9A  | 111.1(2) | C68A | C69  | C69A | 113.6(2)   |
| C9A  | C13A | C13B | 126.0(2) | C69A | C73A | C73  | 118.8(3)   |
| C10  | C9A  | C9   | 119.4(3) | C69A | C73A | C73B | 125.6(2)   |
| C10  | C9A  | C13A | 118.5(3) | C70  | C69A | C69  | 118.2(3)   |
| C10  | C11  | C12  | 119.9(3) | C70  | C69A | C73A | 118.6(3)   |
| C11  | C10  | C9A  | 121.8(3) | C70  | C71  | C72  | 119.4(3)   |
| C12  | C13  | C13A | 121.7(3) | C71  | C70  | C69A | 122.3(3)   |
| C13  | C12  | C11  | 119.4(3) | C71  | C72  | C73  | 119.4(3)   |
| C13  | C13A | C9A  | 118.6(3) | C72  | C73  | C73A | 121.4(3)   |
| C13  | C13A | C13B | 115.4(2) | C73  | C73A | C73B | 115.6(3)   |
| C13A | C9A  | C9   | 121.7(3) | C73A | C69A | C69  | 123.2(2)   |
| C13A | C13B | C1   | 112.5(2) | C73A | C73B | C61  | 111.1(2)   |
| C13B | C1   | C2   | 104.5(2) | C73B | C61  | C62  | 104.9(2)   |
| C14  | C1   | C2   | 113.1(2) | C74  | C61  | C62  | 113.5(2)   |
| C14  | C1   | C13B | 114.1(2) | C74  | C61  | C73B | 113.0(2)   |
| C15  | C2   | C1   | 114.4(2) | C75  | C62  | C61  | 114.8(2)   |
| C15  | C2   | C3   | 112.1(2) | C75  | C62  | C63  | 111.1(2)   |
| C16  | C3   | C2   | 112.8(2) | C76  | C63  | C62  | 111.4(2)   |
| C16  | C17  | C18  | 120.1(3) | C76  | C77  | C78  | 120.7(3)   |
| C17  | C16  | C3   | 120.5(3) | C76  | C81  | C80  | 120.4(3)   |
| C17  | C16  | C21  | 119.3(3) | C77  | C76  | C63  | 120.8(3)   |
| C19  | C18  | C17  | 119.3(3) | C77  | C76  | C81  | 119.3(3)   |
| C20  | C19  | C18  | 120.2(3) | C79  | C78  | C77  | 119.7(3)   |
| C20  | C21  | C16  | 120.6(3) | C79  | C80  | C81  | 119.8(3)   |
| C21  | C16  | C3   | 120.1(2) | C80  | C79  | C78  | 120.2(3)   |
| C21  | C20  | C19  | 120.5(3) | C81  | C76  | C63  | 119.8(2)   |
| N21  | C44  | C31  | 178.5(4) | N41  | C106 | C91  | 178.4(4)   |
| N22  | C45  | C32  | 179.5(4) | N42  | C107 | C92  | 178.8(4)   |
| N34  | C33  | C32  | 100.6(2) | N94  | C93  | C92  | 100.5(2)   |
| N34  | C33  | C46  | 114.4(2) | N94  | C93  | C108 | 113.9(2)   |
| N34  | C43B | C31  | 100.2(2) | N94  | C105 | C91  | 102.17(19) |
| N34  | C43B | C43A | 118.3(2) | N94  | C105 | C104 | 115.9(2)   |
| C33  | N34  | C43B | 104.9(2) | C93  | C92  | C91  | 105.5(2)   |
| C33  | C32  | C31  | 104.6(2) | C94A | N94  | C93  | 117.6(2)   |
| C34A | N34  | C33  | 117.4(2) | C94A | N94  | C105 | 114.04(19) |
| C34A | N34  | C43B | 115.5(2) | C94A | C95  | C96  | 119.5(3)   |
| C34A | C35  | C36  | 120.0(3) | C94A | C98A | C99  | 117.9(2)   |
| C34A | C38A | C39  | 117.7(2) | C95  | C94A | N94  | 124.1(2)   |
| C35  | C34A | N34  | 123.6(2) | C95  | C94A | C98A | 120.2(3)   |
| C35  | C34A | C38A | 120.2(3) | C96  | C97  | C98  | 120.1(3)   |
| C37  | C36  | C35  | 120.0(3) | C97  | C96  | C95  | 120.3(3)   |
| C37  | C38  | C38A | 121.0(3) | C98  | C98A | C94A | 119.0(3)   |
| C38  | C37  | C36  | 120.0(3) | C98  | C98A | C99  | 123.0(2)   |
| C38  | C38A | C34A | 118.7(3) | C98A | C94A | N94  | 115.6(2)   |
| C38  | C38A | C39  | 123.6(3) | C98A | C98  | C97  | 121.0(3)   |
| C38A | C34A | N34  | 116.1(3) | C98A | C99  | C99A | 111.1(2)   |
| C39A | C39  | C38A | 110.7(2) | C99A | C104 | C103 | 118.9(2)   |
| C39A | C43A | C43B | 125.0(2) | C99A | C104 | C105 | 125.7(2)   |
| C40  | C39A | C39  | 119.7(2) | C100 | C99A | C99  | 118.3(2)   |
| C40  | C39A | C43A | 118.0(2) | C100 | C99A | C104 | 118.5(2)   |
| C40  | C41  | C42  | 120.1(3) | C101 | C100 | C99A | 122.0(3)   |
| C41  | C40  | C39A | 122.1(3) | C101 | C102 | C103 | 119.3(3)   |
| C41  | C42  | C43  | 118.9(3) | C102 | C101 | C100 | 119.6(3)   |
| C42  | C43  | C43A | 121.8(3) | C102 | C103 | C104 | 121.7(3)   |

|      |      |      |          |      |      |      |            |
|------|------|------|----------|------|------|------|------------|
| C43  | C43A | C39A | 119.2(2) | C103 | C104 | C105 | 115.4(2)   |
| C43  | C43A | C43B | 115.8(2) | C104 | C99A | C99  | 123.1(2)   |
| C43A | C39A | C39  | 121.9(2) | C104 | C105 | C91  | 112.5(2)   |
| C43A | C43B | C31  | 113.1(2) | C105 | N94  | C93  | 107.18(19) |
| C43B | C31  | C32  | 103.9(2) | C105 | C91  | C92  | 104.7(2)   |
| C44  | C31  | C32  | 113.7(2) | C106 | C91  | C92  | 113.4(2)   |
| C44  | C31  | C43B | 113.5(2) | C106 | C91  | C105 | 112.8(2)   |
| C45  | C32  | C31  | 114.1(2) | C107 | C92  | C91  | 115.0(2)   |
| C45  | C32  | C33  | 112.3(2) | C107 | C92  | C93  | 112.0(2)   |
| C46  | C33  | C32  | 113.4(2) | C108 | C93  | C92  | 111.3(2)   |
| C46  | C47  | C48  | 120.5(3) | C109 | C108 | C93  | 119.9(2)   |
| C46  | C51  | C50  | 120.9(3) | C110 | C109 | C108 | 120.3(3)   |
| C47  | C46  | C33  | 121.5(3) | C110 | C111 | C112 | 119.7(2)   |
| C48  | C49  | C50  | 120.0(3) | C111 | C110 | C109 | 120.5(3)   |
| C49  | C48  | C47  | 120.1(3) | C111 | C112 | C113 | 120.4(3)   |
| C49  | C50  | C51  | 119.8(3) | C112 | C113 | C108 | 120.3(3)   |
| C51  | C46  | C33  | 119.8(3) | C113 | C108 | C93  | 121.2(2)   |
| C51  | C46  | C47  | 118.7(3) | C113 | C108 | C109 | 118.8(2)   |

Table 6 Hydrogen Atom Coordinates ( $\text{\AA}\times 10^4$ ) and Isotropic Displacement Parameters ( $\text{\AA}^2\times 10^3$ ) for **16**.

| Atom | x    | y    | z    | U(eq) |
|------|------|------|------|-------|
| H1   | 7161 | 4494 | 7165 | 32    |
| H2   | 6554 | 4542 | 7037 | 32    |
| H3   | 6239 | 4610 | 5083 | 35    |
| H5   | 6152 | 5142 | 4011 | 42    |
| H6   | 6109 | 5721 | 2948 | 56    |
| H7   | 6594 | 6282 | 3305 | 59    |
| H8   | 7118 | 6272 | 4720 | 57    |
| H9A  | 7184 | 5654 | 6641 | 47    |
| H9B  | 7433 | 5984 | 6292 | 47    |
| H10F | 8056 | 5692 | 6567 | 46    |
| H11D | 8485 | 5117 | 6559 | 46    |
| H12  | 8254 | 4367 | 6129 | 43    |
| H13  | 7602 | 4195 | 5788 | 36    |
| H13A | 6919 | 4487 | 5215 | 32    |
| H17  | 5610 | 4950 | 4612 | 45    |
| H18  | 5145 | 5417 | 4872 | 56    |
| H19  | 5326 | 5801 | 6274 | 54    |
| H20  | 5962 | 5744 | 7375 | 48    |
| H21  | 6423 | 5305 | 7104 | 38    |
| H31  | 5491 | 3065 | 2903 | 37    |
| H32  | 6113 | 2960 | 3161 | 35    |
| H33  | 6341 | 2918 | 5106 | 34    |
| H35  | 6395 | 2329 | 6081 | 35    |
| H36  | 6391 | 1715 | 7032 | 40    |
| H37  | 5860 | 1207 | 6567 | 42    |
| H38  | 5348 | 1290 | 5134 | 39    |
| H39B | 5369 | 1950 | 3320 | 37    |
| H39A | 5083 | 1631 | 3580 | 37    |
| H40  | 4481 | 1968 | 3349 | 38    |
| H41  | 4087 | 2570 | 3419 | 39    |
| H42  | 4355 | 3305 | 3860 | 40    |
| H43  | 5021 | 3421 | 4235 | 36    |
| H43A | 5679 | 3074 | 4834 | 31    |
| H47  | 6270 | 2172 | 3214 | 42    |
| H48  | 6777 | 1702 | 3192 | 56    |
| H49  | 7371 | 1668 | 4463 | 60    |
| H50  | 7465 | 2111 | 5760 | 54    |

|      |      |      |       |    |
|------|------|------|-------|----|
| H51  | 6966 | 2596 | 5767  | 43 |
| H1SB | 5210 | 4881 | 2972  | 25 |
| H1SA | 4933 | 4929 | 1807  | 25 |
| H61  | 5418 | 2092 | 7879  | 33 |
| H62  | 5987 | 1941 | 7829  | 34 |
| H63  | 6411 | 1958 | 9779  | 32 |
| H65  | 6680 | 2432 | 10899 | 41 |
| H66  | 6943 | 2989 | 12050 | 52 |
| H67  | 6659 | 3714 | 11873 | 54 |
| H68  | 6139 | 3910 | 10511 | 46 |
| H69A | 5818 | 3306 | 8474  | 41 |
| H69B | 5699 | 3727 | 8937  | 41 |
| H70  | 5036 | 3731 | 8538  | 49 |
| H71  | 4444 | 3407 | 8362  | 52 |
| H72  | 4412 | 2621 | 8646  | 48 |
| H73  | 4974 | 2166 | 9055  | 41 |
| H73A | 5736 | 2174 | 9826  | 32 |
| H77  | 7038 | 1813 | 9683  | 55 |
| H78  | 7533 | 2024 | 9212  | 71 |
| H79  | 7425 | 2619 | 8154  | 59 |
| H80  | 6827 | 3006 | 7579  | 48 |
| H81  | 6333 | 2795 | 8059  | 42 |
| H91  | 6952 | -517 | 7142  | 31 |
| H92  | 6362 | -604 | 7111  | 31 |
| H93  | 5980 | -567 | 5149  | 29 |
| H95  | 5785 | -43  | 4018  | 35 |
| H96  | 5604 | 557  | 2932  | 38 |
| H97  | 5910 | 1270 | 3311  | 39 |
| H98  | 6412 | 1387 | 4747  | 36 |
| H99A | 6656 | 694  | 6666  | 34 |
| H99B | 6809 | 1128 | 6303  | 34 |
| H10  | 7462 | 1078 | 6571  | 39 |
| H10A | 8019 | 706  | 6596  | 42 |
| H10B | 7997 | -81  | 6275  | 39 |
| H10C | 7411 | -483 | 5900  | 34 |
| H10D | 6668 | -416 | 5205  | 29 |
| H10E | 5368 | -761 | 5335  | 36 |
| H11  | 4865 | -536 | 5762  | 38 |
| H11A | 4924 | 133  | 6615  | 36 |
| H11B | 5492 | 578  | 7052  | 37 |
| H11C | 6006 | 347  | 6667  | 34 |

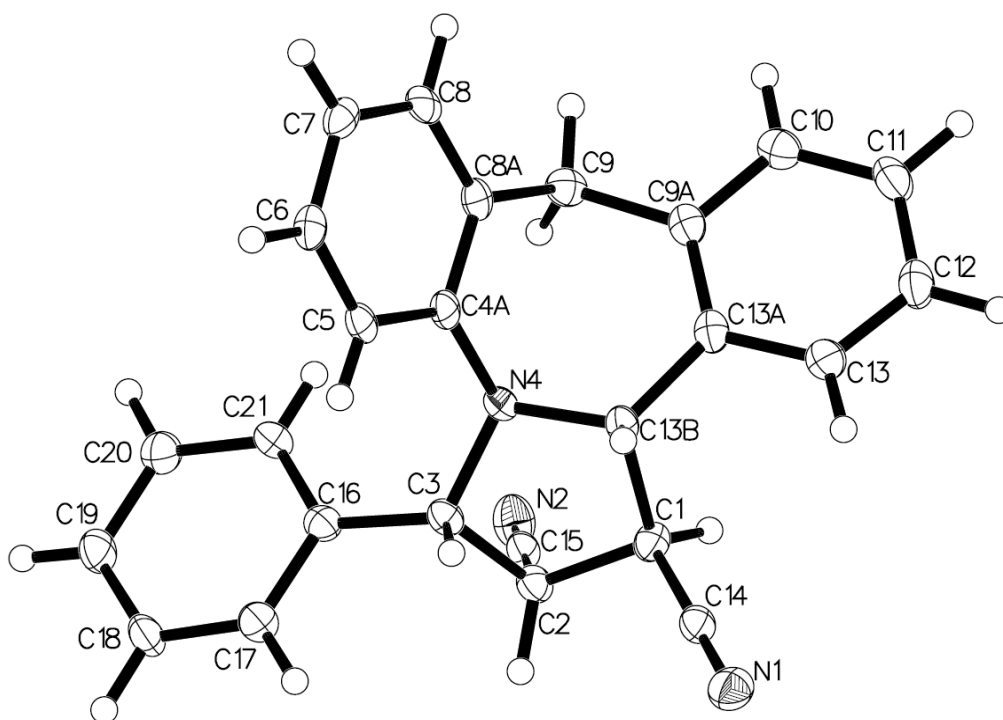

X-Ray crystal structures of **18**.

**Table 1:** Crystal data and structure refinement for **18**.

|                                         |                                                |
|-----------------------------------------|------------------------------------------------|
| Identification code                     | dax18                                          |
| Empirical formula                       | C <sub>25</sub> H <sub>19</sub> N <sub>3</sub> |
| Formula weight                          | 361.43                                         |
| Temperature / K                         | 119.88                                         |
| Crystal system                          | Monoclinic                                     |
| Space group                             | P2 <sub>1</sub>                                |
| a / Å, b / Å, c / Å                     | 12.6196(2), 5.85170(10), 12.6336(2)            |
| α/°, β/°, γ/°                           | 90.00, 99.2900(10), 90.00                      |
| Volume / Å <sup>3</sup>                 | 920.71(3)                                      |
| Z                                       | 2                                              |
| ρ <sub>calc</sub> / mg mm <sup>-3</sup> | 1.304                                          |
| μ / mm <sup>-1</sup>                    | 0.604                                          |
| F(000)                                  | 380                                            |
| Crystal size / mm <sup>3</sup>          | 0.18 × 0.02 × 0.01                             |
| Theta range for data collection         | 3.54 to 55.92°                                 |
| Index ranges                            | -13 ≤ h ≤ 13, -6 ≤ k ≤ 6, -13 ≤ l ≤ 11         |

|                                             |                                                   |
|---------------------------------------------|---------------------------------------------------|
| Reflections collected                       | 3871                                              |
| Independent reflections                     | 2041[R(int) = 0.0249]                             |
| Data/restraints/parameters                  | 2041/1/329                                        |
| Goodness-of-fit on F <sup>2</sup>           | 1.066                                             |
| Final R indexes [I>2σ (I)]                  | R <sub>1</sub> = 0.0331, wR <sub>2</sub> = 0.0805 |
| Final R indexes [all data]                  | R <sub>1</sub> = 0.0355, wR <sub>2</sub> = 0.0822 |
| Largest diff. peak/hole / e Å <sup>-3</sup> | 0.120/-0.150                                      |

Table 2 Atomic Coordinates (Å×10<sup>4</sup>) and Equivalent Isotropic Displacement Parameters (Å<sup>2</sup>×10<sup>3</sup>) for **18**. U<sub>eq</sub> is defined as 1/3 of the trace of the orthogonalised U<sub>ij</sub> tensor.

| Atom | x          | y        | z          | U(eq)   |
|------|------------|----------|------------|---------|
| N1   | 1038.7(16) | 784(4)   | 4953.4(17) | 29.3(5) |
| N2   | 279.1(18)  | 9060(4)  | 7233.9(17) | 31.3(6) |
| N4   | 2749.5(14) | 5760(3)  | 7344.4(15) | 18.9(5) |
| C1   | 1413.1(18) | 4788(4)  | 5853(2)    | 20.6(6) |
| C2   | 950.7(18)  | 4906(4)  | 6916.8(19) | 20.0(6) |
| C3   | 1943.9(18) | 4366(4)  | 7761.5(19) | 18.6(5) |
| C4A  | 3828.3(18) | 5835(4)  | 7910.1(18) | 18.7(6) |
| C5   | 4275.0(18) | 4187(4)  | 8639.8(18) | 19.9(6) |
| C6   | 5315.9(18) | 4422(5)  | 9169.0(19) | 22.5(6) |
| C7   | 5917.5(19) | 6307(4)  | 8984.3(19) | 22.6(6) |
| C8   | 5470.7(19) | 7967(4)  | 8268(2)    | 20.8(6) |
| C8A  | 4429.5(19) | 7759(4)  | 7719.2(18) | 19.3(6) |
| C9   | 3920.3(19) | 9531(4)  | 6941(2)    | 21.7(6) |
| C9A  | 3688.2(18) | 8762(4)  | 5786.8(19) | 20.0(6) |
| C10  | 4048.6(19) | 10124(5) | 5004(2)    | 24.3(6) |
| C11  | 3836(2)    | 9554(5)  | 3928(2)    | 27.9(6) |
| C12  | 3284(2)    | 7584(5)  | 3609(2)    | 27.1(6) |
| C13  | 2939.3(19) | 6190(5)  | 4375(2)    | 24.2(6) |
| C13A | 3121.3(18) | 6776(4)  | 5459(2)    | 20.1(6) |
| C13B | 2654.7(17) | 5139(4)  | 6198.2(18) | 18.0(5) |
| C14  | 1192.5(18) | 2566(5)  | 5336(2)    | 22.1(6) |
| C15  | 559.4(18)  | 7236(5)  | 7091.5(19) | 22.2(6) |
| C16  | 1786.0(17) | 4818(4)  | 8902.9(19) | 19.4(6) |
| C17  | 1253.3(18) | 3140(4)  | 9407(2)    | 23.6(6) |
| C18  | 1041.8(19) | 3483(4)  | 10438(2)   | 25.0(6) |
| C19  | 1366.7(18) | 5462(4)  | 10980(2)   | 25.9(6) |
| C20  | 1892.3(18) | 7145(5)  | 10485(2)   | 26.5(6) |
| C21  | 2092.5(19) | 6814(4)  | 9448(2)    | 22.9(6) |

Table 3 Anisotropic Displacement Parameters ( $\text{\AA}^2 \times 10^3$ ) for **18**. The Anisotropic displacement factor exponent takes the form:  $-2\pi^2[h^2a^*U_{11} + \dots + 2hka^*b^*U_{12}]$

| Atom | $U_{11}$ | $U_{22}$ | $U_{33}$ | $U_{23}$ | $U_{13}$ | $U_{12}$ |
|------|----------|----------|----------|----------|----------|----------|
| N1   | 22.3(11) | 37.2(15) | 28.7(13) | -4.3(12) | 4.5(10)  | -0.9(10) |
| N2   | 38.8(13) | 31.6(14) | 24.9(12) | -0.9(11) | 9.6(10)  | 5.3(11)  |
| N4   | 17.1(9)  | 23.3(11) | 17.2(11) | 1.1(8)   | 5.8(9)   | -2.6(8)  |
| C1   | 19.7(12) | 23.5(14) | 17.9(14) | -0.8(12) | 0.5(11)  | 0.8(10)  |
| C2   | 20.1(12) | 22.1(14) | 19.1(14) | -0.1(11) | 6.4(12)  | -0.3(11) |
| C3   | 19.0(11) | 19.3(14) | 18.7(13) | 0.1(10)  | 6.9(10)  | 0.6(10)  |
| C4A  | 20.0(12) | 24.2(14) | 13.0(12) | -2.1(10) | 6.1(11)  | 0.3(11)  |
| C5   | 23.3(13) | 23.1(15) | 15.1(13) | -0.5(11) | 8.7(11)  | 0.4(11)  |
| C6   | 25.4(13) | 27.5(15) | 14.9(13) | -1.4(11) | 3.9(11)  | 2.9(11)  |
| C7   | 18.8(13) | 31.8(15) | 17.3(14) | -7.2(11) | 3.4(12)  | 1.4(11)  |
| C8   | 22.3(13) | 23.9(15) | 19.0(14) | -4.3(11) | 12.1(11) | -2.5(11) |
| C8A  | 23.5(12) | 22.0(13) | 14.2(13) | -3.1(10) | 8.3(11)  | 2.6(10)  |
| C9   | 20.8(12) | 21.2(15) | 24.5(15) | -2.8(11) | 7.5(12)  | -0.4(12) |
| C9A  | 18.6(11) | 22.1(14) | 19.4(14) | 3.9(11)  | 3.5(11)  | 5.7(11)  |
| C10  | 22.6(12) | 22.2(15) | 28.2(15) | 4.0(12)  | 4.0(12)  | 1.1(12)  |
| C11  | 24.8(12) | 37.2(17) | 23.5(15) | 7.8(13)  | 9.3(12)  | 1.0(12)  |
| C12  | 26.5(13) | 37.8(17) | 17.8(14) | 0.7(13)  | 5.9(12)  | 3.9(13)  |
| C13  | 23.8(13) | 26.8(16) | 22.8(15) | -1.2(12) | 6.3(12)  | -1.4(12) |
| C13A | 18.7(12) | 24.6(15) | 17.2(13) | 2.3(10)  | 3.4(10)  | 6.1(11)  |
| C13B | 20.6(11) | 18.9(14) | 15.2(13) | -0.1(10) | 4.8(10)  | 0.5(10)  |
| C14  | 17.3(12) | 31.5(16) | 18.2(13) | -0.5(13) | 5.3(10)  | -1.1(11) |
| C15  | 19.4(12) | 31.7(17) | 16.1(13) | 2.2(11)  | 5.0(11)  | -3.4(12) |
| C16  | 15.9(11) | 21.3(14) | 20.7(14) | 2.9(10)  | 2.2(10)  | 0.7(10)  |
| C17  | 23.8(13) | 24.7(16) | 22.7(15) | 1.7(11)  | 4.4(12)  | -1.2(11) |
| C18  | 25.5(13) | 30.9(16) | 20.2(15) | 5.1(11)  | 8.5(12)  | -2.0(12) |
| C19  | 22.7(12) | 36.8(17) | 19.8(15) | -1.8(12) | 8.3(12)  | 1.1(12)  |
| C20  | 25.9(14) | 30.8(16) | 23.4(15) | -3.3(12) | 5.4(12)  | -1.8(12) |
| C21  | 21.5(13) | 26.5(16) | 21.9(14) | 2.2(11)  | 7.2(12)  | -3.9(11) |

Table 4 Bond Lengths for **18**.

| Atom | Atom | Length/Å | Atom | Atom | Length/Å |
|------|------|----------|------|------|----------|
| N1   | C14  | 1.153(3) | C8   | C8A  | 1.389(3) |
| N2   | C15  | 1.148(3) | C8A  | C9   | 1.501(3) |
| N4   | C3   | 1.466(3) | C9   | C9A  | 1.509(3) |
| N4   | C4A  | 1.432(3) | C9A  | C10  | 1.401(3) |
| N4   | C13B | 1.479(3) | C9A  | C13A | 1.392(3) |
| C1   | C2   | 1.551(3) | C10  | C11  | 1.385(4) |
| C1   | C13B | 1.571(3) | C11  | C12  | 1.372(4) |
| C1   | C14  | 1.461(4) | C12  | C13  | 1.389(4) |
| C2   | C3   | 1.542(3) | C13  | C13A | 1.394(4) |
| C2   | C15  | 1.479(4) | C13A | C13B | 1.522(3) |
| C3   | C16  | 1.510(3) | C16  | C17  | 1.400(3) |
| C4A  | C5   | 1.389(3) | C16  | C21  | 1.379(3) |
| C4A  | C8A  | 1.400(4) | C17  | C18  | 1.386(4) |
| C5   | C6   | 1.381(3) | C18  | C19  | 1.374(4) |
| C6   | C7   | 1.380(4) | C19  | C20  | 1.391(4) |
| C7   | C8   | 1.384(4) | C20  | C21  | 1.388(4) |

Table 5 Bond Angles for **18**.

| Atom | Atom | Atom | Angle/°    | Atom | Atom | Atom | Angle/°    |
|------|------|------|------------|------|------|------|------------|
| N1   | C14  | C1   | 178.0(3)   | C9A  | C13A | C13B | 125.0(2)   |
| N2   | C15  | C2   | 178.5(3)   | C10  | C9A  | C9   | 118.5(2)   |
| N4   | C3   | C2   | 99.82(18)  | C11  | C10  | C9A  | 121.5(3)   |
| N4   | C3   | C16  | 116.87(19) | C11  | C12  | C13  | 119.4(2)   |
| N4   | C13B | C1   | 102.92(17) | C12  | C11  | C10  | 120.0(3)   |
| N4   | C13B | C13A | 117.91(19) | C12  | C13  | C13A | 121.3(3)   |
| C2   | C1   | C13B | 104.55(17) | C13  | C13A | C13B | 115.4(2)   |
| C3   | N4   | C13B | 105.31(17) | C13A | C9A  | C9   | 123.2(2)   |
| C3   | C2   | C1   | 102.32(18) | C13A | C9A  | C10  | 118.3(2)   |
| C4A  | N4   | C3   | 119.74(18) | C13A | C13B | C1   | 112.28(19) |
| C4A  | N4   | C13B | 114.59(18) | C14  | C1   | C2   | 110.8(2)   |
| C4A  | C8A  | C9   | 118.8(2)   | C14  | C1   | C13B | 110.5(2)   |
| C5   | C4A  | N4   | 124.1(2)   | C15  | C2   | C1   | 110.61(19) |
| C5   | C4A  | C8A  | 120.0(2)   | C15  | C2   | C3   | 109.83(19) |
| C6   | C5   | C4A  | 120.3(2)   | C16  | C3   | C2   | 114.03(18) |
| C6   | C7   | C8   | 119.6(2)   | C16  | C21  | C20  | 120.7(2)   |
| C7   | C6   | C5   | 120.2(2)   | C17  | C16  | C3   | 117.3(2)   |
| C7   | C8   | C8A  | 121.2(2)   | C18  | C17  | C16  | 120.3(2)   |
| C8   | C8A  | C4A  | 118.7(2)   | C18  | C19  | C20  | 119.9(2)   |
| C8   | C8A  | C9   | 122.5(2)   | C19  | C18  | C17  | 120.2(2)   |
| C8A  | C4A  | N4   | 115.88(19) | C21  | C16  | C3   | 123.7(2)   |
| C8A  | C9   | C9A  | 115.0(2)   | C21  | C16  | C17  | 118.9(2)   |
| C9A  | C13A | C13  | 119.5(2)   | C21  | C20  | C19  | 119.9(3)   |

Table 6 Hydrogen Atom Coordinates (Å×10<sup>4</sup>) and Isotropic Displacement Parameters (Å<sup>2</sup>×10<sup>3</sup>) for **18**.

| Atom | x        | y         | z        | U(eq) |
|------|----------|-----------|----------|-------|
| H1   | 1118(17) | 5970.0(4) | 5354(18) | 14(6) |

|      |           |            |            |       |
|------|-----------|------------|------------|-------|
| H2   | 320.0(2)  | 3840.0(5)  | 6980.0(2)  | 36(7) |
| H3   | 2089(18)  | 2720.0(5)  | 7651(17)   | 17(6) |
| H5   | 3862(18)  | 2920.0(4)  | 8769(18)   | 14(6) |
| H6   | 5605(16)  | 3250.0(4)  | 9674(19)   | 9(6)  |
| H7   | 6632(18)  | 6480.0(4)  | 9393(17)   | 17(6) |
| H8   | 5880(18)  | 9350.0(4)  | 8147(17)   | 12(5) |
| H9A  | 3257(18)  | 10020.0(4) | 7178(18)   | 10(5) |
| H9B  | 4364(18)  | 10960.0(5) | 6974(17)   | 18(6) |
| H10  | 4460(19)  | 11400.0(5) | 5209(19)   | 23(7) |
| H11  | 4090.0(2) | 10590.0(5) | 3370.0(2)  | 37(7) |
| H12  | 3109(19)  | 7110.0(4)  | 2830.0(2)  | 27(7) |
| H13  | 2600.0(2) | 4810.0(5)  | 4143(19)   | 23(7) |
| H13A | 2987(16)  | 3610.0(4)  | 6145(17)   | 10(6) |
| H17  | 1034(19)  | 1730.0(5)  | 9007(19)   | 26(7) |
| H18  | 620.0(2)  | 2270.0(5)  | 10760.0(2) | 37(7) |
| H19  | 1240.0(2) | 5710.0(5)  | 11680.0(2) | 30(7) |
| H20  | 2110.0(2) | 8600.0(5)  | 10850.0(2) | 28(7) |
| H21  | 2431(18)  | 7970.0(4)  | 9133(18)   | 15(6) |

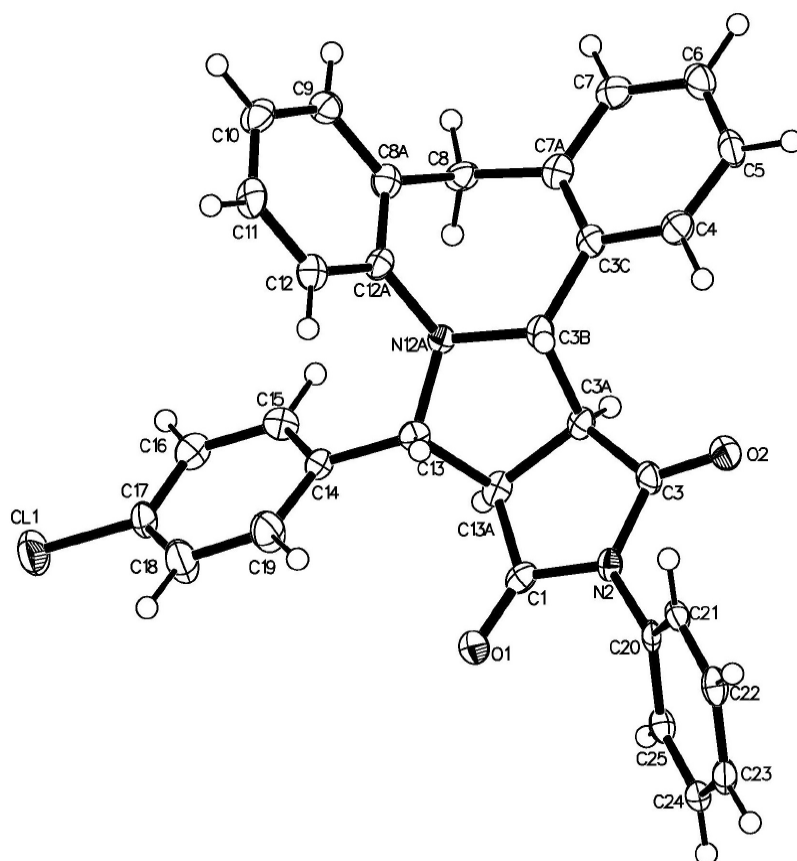

X-Ray crystal structures of **20**.

Table 1 Crystal data and structure refinement for **20**.

|                     |                                                                 |
|---------------------|-----------------------------------------------------------------|
| Identification code | dax12                                                           |
| Empirical formula   | C <sub>31</sub> H <sub>23</sub> N <sub>2</sub> ClO <sub>2</sub> |



|                                             |                                                   |
|---------------------------------------------|---------------------------------------------------|
| Formula weight                              | 490.96                                            |
| Temperature/K                               | 100.0                                             |
| Crystal system                              | Monoclinic                                        |
| Space group                                 | P2 <sub>1</sub> /n                                |
| a/Å, b/Å, c/Å                               | 10.6905(2), 7.6706(1), 29.1159(4)                 |
| α/°, β/°, γ/°                               | 90.00, 90.142(1), 90.00                           |
| Volume/Å <sup>3</sup>                       | 2387.57(6)                                        |
| Z                                           | 4                                                 |
| ρ <sub>calc</sub> /mg/mm <sup>3</sup>       | 1.366                                             |
| m/mm <sup>-1</sup>                          | 1.675                                             |
| F(000)                                      | 1024                                              |
| Crystal size/mm <sup>3</sup>                | 0.05 × 0.03 × 0.04                                |
| Theta range for data collection             | 3.04 to 52.50°                                    |
| Index ranges                                | -11 ≤ h ≤ 11, -7 ≤ k ≤ 7, -29 ≤ l ≤ 27            |
| Reflections collected                       | 8647                                              |
| Independent reflections                     | 2697[R(int) = 0.0909]                             |
| Data/restraints/parameters                  | 2697/0/417                                        |
| Goodness-of-fit on F <sup>2</sup>           | 1.042                                             |
| Final R indexes [I > 2σ (I)]                | R <sub>1</sub> = 0.0426, wR <sub>2</sub> = 0.1130 |
| Final R indexes [all data]                  | R <sub>1</sub> = 0.0525, wR <sub>2</sub> = 0.1178 |
| Largest diff. peak/hole / e Å <sup>-3</sup> | 0.383/-0.451                                      |

Table 2 Atomic Coordinates ( $\text{\AA}\times 10^4$ ) and Equivalent Isotropic Displacement Parameters ( $\text{\AA}^2\times 10^3$ ) for **20**.  $U_{\text{eq}}$  is defined as 1/3 of the trace of the orthogonalised  $U_{ij}$  tensor.

| Atom | x          | y           | z          | U(eq)    |
|------|------------|-------------|------------|----------|
| Cl1  | 4891.2(7)  | 13708.1(11) | 4572.5(3)  | 38.9(3)  |
| O1   | 4972.1(19) | 6737(3)     | 3140.5(7)  | 24.3(5)  |
| O2   | 8090.9(18) | 2875(3)     | 2817.2(7)  | 30.4(6)  |
| N2   | 6346(2)    | 4545(3)     | 2937.6(7)  | 17.2(6)  |
| N12A | 8508(2)    | 6894(3)     | 3928.3(8)  | 18.4(6)  |
| C1   | 6026(3)    | 6188(4)     | 3119.8(9)  | 18.7(7)  |
| C3   | 7618(3)    | 4207(4)     | 2960.9(9)  | 19.7(7)  |
| C3A  | 8257(3)    | 5738(4)     | 3191.2(10) | 17.8(7)  |
| C3B  | 8879(3)    | 5337(4)     | 3664.7(9)  | 18.8(7)  |
| C3C  | 10259(3)   | 4897(4)     | 3651(9)    | 18.9(7)  |
| C4   | 10564(3)   | 3244(4)     | 3482(10)   | 23.5(8)  |
| C5   | 11796(3)   | 2708(5)     | 3441.3(10) | 24.9(8)  |
| C6   | 12743(3)   | 3817(4)     | 3572.3(10) | 27.8(8)  |
| C7   | 12461(3)   | 5443(5)     | 3746.4(10) | 25.2(8)  |
| C7A  | 11226(3)   | 6018(4)     | 3792.6(9)  | 20(7)    |
| C8   | 10976(3)   | 7751(4)     | 4017.3(11) | 21.9(8)  |
| C8A  | 10197(3)   | 7535(4)     | 4445.4(10) | 20.7(7)  |
| C9   | 10673(3)   | 7784(4)     | 4883.8(10) | 23.6(8)  |
| C10  | 9910(3)    | 7549(4)     | 5264.5(11) | 27.1(8)  |
| C11  | 8682(3)    | 7063(4)     | 5207.3(11) | 24.9(8)  |
| C12  | 8191(3)    | 6793(4)     | 4773.7(10) | 21.8(8)  |
| C12A | 8950(3)    | 7029(4)     | 4392.4(10) | 18.9(7)  |
| C13  | 7187(3)    | 7132(4)     | 3832.6(10) | 19(7)    |
| C13A | 7201(3)    | 7011(4)     | 3300.6(10) | 18.8(7)  |
| C14  | 6630(3)    | 8799(4)     | 4017.6(9)  | 20.7(8)  |
| C15  | 7337(3)    | 10296(4)    | 4064(10)   | 22.5(7)  |
| C16  | 6789(3)    | 11797(5)    | 4240(11)   | 24.5(8)  |
| C17  | 5550(3)    | 11806(4)    | 4354.9(10) | 26.4(8)  |
| C18  | 4833(3)    | 10331(5)    | 4304.1(13) | 40.6(10) |
| C19  | 5385(3)    | 8835(5)     | 4145.4(12) | 33.8(9)  |
| C20  | 5420(3)    | 3399(4)     | 2749.7(9)  | 16.8(7)  |
| C21  | 5290(3)    | 1727(4)     | 2921.6(11) | 18.2(7)  |
| C22  | 4367(3)    | 661(4)      | 2747.4(10) | 20.6(8)  |
| C23  | 3568(3)    | 1271(4)     | 2408.9(11) | 22.2(8)  |
| C24  | 3701(3)    | 2940(4)     | 2242.9(11) | 20.3(8)  |
| C25  | 4633(3)    | 4004(5)     | 2410.1(10) | 18.2(8)  |

Table 3 Anisotropic Displacement Parameters ( $\text{\AA}^2 \times 10^3$ ) for **20**. The Anisotropic displacement factor exponent takes the form:  $-2\pi^2[h^2a^*U_{11} + \dots + 2hka^*b^*U_{12}]$

| Atom | $U_{11}$ | $U_{22}$ | $U_{33}$ | $U_{23}$  | $U_{13}$ | $U_{12}$ |
|------|----------|----------|----------|-----------|----------|----------|
| Cl1  | 37.5(5)  | 31.8(6)  | 47.5(6)  | -15.6(4)  | 3.5(4)   | 6.8(4)   |
| O1   | 24.3(13) | 22.2(12) | 26.4(12) | -5(10)    | -1.7(9)  | 4.2(10)  |
| O2   | 21.6(12) | 35.7(15) | 33.9(13) | -13.6(12) | -1(10)   | 3.6(11)  |
| N2   | 20.3(14) | 13.8(14) | 17.6(13) | -3.1(11)  | 2.7(10)  | -1.1(11) |
| N12A | 19.4(14) | 19.9(14) | 15.8(14) | -1.9(11)  | -1.1(10) | 3.4(11)  |
| C1   | 22.2(19) | 21.8(19) | 12.1(15) | 2.7(14)   | 0.3(13)  | -4.3(15) |
| C3   | 19.9(17) | 24(2)    | 15.5(16) | -0.5(15)  | 5(13)    | 3.4(15)  |
| C3A  | 19.3(16) | 20.9(18) | 13.2(16) | 0.3(14)   | 4.3(14)  | -3.1(14) |
| C3B  | 20.8(16) | 17.1(17) | 18.5(16) | -1.9(14)  | 2.4(13)  | -1.8(14) |
| C3C  | 22.7(16) | 21.5(18) | 12.5(15) | 3.8(14)   | 4.2(12)  | 1.9(14)  |
| C4   | 26.5(19) | 26.4(19) | 17.6(17) | 2.1(15)   | 0.7(14)  | 1(16)    |
| C5   | 30(2)    | 25(2)    | 20.5(18) | -1.4(16)  | 5.6(14)  | 9.4(17)  |
| C6   | 27(2)    | 36(2)    | 20.1(17) | 0.3(16)   | 4.5(15)  | 8.5(17)  |
| C7   | 22.9(19) | 34(2)    | 18.4(17) | 3.7(16)   | 0.5(14)  | -3(17)   |
| C7A  | 25.5(18) | 20.5(18) | 13.9(15) | 5.1(14)   | 4.1(13)  | -2.5(14) |
| C8   | 17.3(18) | 27(2)    | 21.1(18) | -1.7(16)  | -1.4(14) | -5(16)   |
| C8A  | 25.2(18) | 16.3(16) | 20.6(18) | 0.1(14)   | 1(14)    | 0.1(14)  |
| C9   | 24.3(19) | 22(19)   | 25(2)    | -0.6(15)  | -2.7(15) | 2.7(15)  |
| C10  | 37(2)    | 25.7(19) | 18.3(19) | 0.5(15)   | -6.3(17) | 3.6(16)  |
| C11  | 36(2)    | 25(2)    | 14(19)   | 4.9(15)   | 7.3(16)  | 3.4(15)  |
| C12  | 27(2)    | 15.7(17) | 22(2)    | 1(14)     | 2.5(16)  | 0(15)    |
| C12A | 26.3(18) | 15.1(17) | 15.3(17) | 0.1(13)   | -2.2(14) | 0.8(14)  |
| C13  | 19.2(17) | 18.3(18) | 19.6(17) | 0.7(14)   | -0.4(13) | -1.3(14) |
| C13A | 27.2(18) | 14(18)   | 15.1(16) | 2.1(14)   | 1.5(13)  | -3(14)   |
| C14  | 21.8(18) | 25(2)    | 15(16)   | -2.7(14)  | -0.8(13) | 2.1(15)  |
| C15  | 22.3(18) | 21.4(19) | 24(18)   | 3.7(15)   | -0.2(14) | -0.7(16) |
| C16  | 30(2)    | 19.2(19) | 24.2(18) | 1.4(15)   | -1.5(15) | -4.3(17) |
| C17  | 31(2)    | 22.7(19) | 25.4(18) | -7.8(15)  | -0.6(14) | 9.7(16)  |
| C18  | 24(2)    | 37(2)    | 60(3)    | -24(2)    | 8.3(17)  | -2.2(18) |
| C19  | 26(2)    | 27(2)    | 48(2)    | -13.6(18) | 3.2(16)  | -3.4(17) |
| C20  | 19.3(16) | 17.2(18) | 14(15)   | -5.4(14)  | 3.9(13)  | 3.8(14)  |
| C21  | 21.4(17) | 17(19)   | 16.1(17) | 0.1(15)   | 2.7(15)  | 7.2(15)  |
| C22  | 26.7(19) | 12.5(19) | 22.7(18) | -1(15)    | 7.8(15)  | -0.1(15) |
| C23  | 19.2(18) | 23(2)    | 24.7(18) | -10.6(16) | 6.1(15)  | -2.9(16) |
| C24  | 20.1(17) | 24(2)    | 17(17)   | -4.1(16)  | 0.1(15)  | 6.4(15)  |
| C25  | 24.9(19) | 12(2)    | 17.5(17) | 1.9(16)   | 5.1(14)  | 3.1(16)  |

Table 4 Bond Lengths for **20**.

| Atom | Atom | Length/Å | Atom | Atom | Length/Å |
|------|------|----------|------|------|----------|
| C1   | C17  | 1.740(3) | C8   | C8A  | 1.510(4) |
| O1   | C1   | 1.204(3) | C8A  | C9   | 1.386(4) |
| O2   | C3   | 1.214(3) | C8A  | C12A | 1.397(4) |
| N2   | C1   | 1.410(4) | C9   | C10  | 1.389(5) |
| N2   | C3   | 1.386(4) | C10  | C11  | 1.375(5) |
| N2   | C20  | 1.431(4) | C11  | C12  | 1.382(4) |
| N12A | C3B  | 1.475(4) | C12  | C12A | 1.388(4) |
| N12A | C12A | 1.434(4) | C13  | C13A | 1.552(4) |
| N12A | C13  | 1.450(4) | C13  | C14  | 1.511(4) |
| C1   | C13A | 1.501(4) | C14  | C15  | 1.381(4) |
| C3   | C3A  | 1.514(4) | C14  | C19  | 1.383(4) |
| C3A  | C3B  | 1.560(4) | C15  | C16  | 1.390(4) |
| C3A  | C13A | 1.527(4) | C16  | C17  | 1.368(4) |
| C3B  | C3C  | 1.514(4) | C17  | C18  | 1.375(5) |
| C3C  | C4   | 1.399(4) | C18  | C19  | 1.371(5) |
| C3C  | C7A  | 1.405(4) | C20  | C21  | 1.384(4) |
| C4   | C5   | 1.385(4) | C20  | C25  | 1.377(4) |
| C5   | C6   | 1.376(5) | C21  | C22  | 1.377(4) |
| C6   | C7   | 1.380(5) | C22  | C23  | 1.384(4) |
| C7   | C7A  | 1.399(4) | C23  | C24  | 1.376(5) |
| C7A  | C8   | 1.506(4) | C24  | C25  | 1.377(4) |

Table 5 Bond Angles for 20.

| Atom | Atom | Atom | Angle/°  | Atom | Atom | Atom | Angle/°  |
|------|------|------|----------|------|------|------|----------|
| O1   | C1   | N2   | 124.0(3) | C9   | C8A  | C8   | 122.9(3) |
| O1   | C1   | C13A | 128.1(3) | C9   | C8A  | C12A | 119.2(3) |
| O2   | C3   | N2   | 123.3(3) | C10  | C11  | C12  | 120.8(3) |
| O2   | C3   | C3A  | 128.1(3) | C11  | C10  | C9   | 120.0(3) |
| N2   | C1   | C13A | 107.7(2) | C11  | C12  | C12A | 119.3(3) |
| N2   | C3   | C3A  | 108.5(2) | C12  | C12A | N12A | 123.5(3) |
| N12A | C3B  | C3A  | 100.7(2) | C12  | C12A | C8A  | 120.5(3) |
| N12A | C3B  | C3C  | 117.3(2) | C12A | N12A | C3B  | 117.4(2) |
| N12A | C13  | C13A | 99.9(2)  | C12A | N12A | C13  | 119.4(2) |
| N12A | C13  | C14  | 115.0(2) | C12A | C8A  | C8   | 117.9(3) |
| C1   | N2   | C20  | 121.6(2) | C13  | N12A | C3B  | 105.4(2) |
| C1   | C13A | C3A  | 106.0(2) | C13A | C3A  | C3B  | 104.8(2) |
| C1   | C13A | C13  | 111.4(2) | C14  | C13  | C13A | 114.3(2) |
| C3   | N2   | C1   | 112.8(2) | C14  | C15  | C16  | 119.6(3) |
| C3   | N2   | C20  | 125.6(2) | C15  | C14  | C13  | 121.5(3) |
| C3   | C3A  | C3B  | 115.4(2) | C15  | C14  | C19  | 119.0(3) |
| C3   | C3A  | C13A | 104.8(2) | C16  | C17  | C1   | 119.1(3) |
| C3A  | C13A | C13  | 104.8(2) | C16  | C17  | C18  | 120.7(3) |
| C3C  | C3B  | C3A  | 115.7(2) | C17  | C16  | C15  | 120.3(3) |
| C3C  | C7A  | C8   | 122.5(3) | C18  | C17  | C1   | 120.2(2) |
| C4   | C3C  | C3B  | 116.0(3) | C18  | C19  | C14  | 121.5(3) |
| C4   | C3C  | C7A  | 119.1(3) | C19  | C14  | C13  | 119.5(3) |
| C5   | C4   | C3C  | 121.4(3) | C19  | C18  | C17  | 119.0(3) |
| C5   | C6   | C7   | 119.9(3) | C21  | C20  | N2   | 120.1(3) |
| C6   | C5   | C4   | 119.5(3) | C21  | C22  | C23  | 120.1(3) |
| C6   | C7   | C7A  | 121.8(3) | C22  | C21  | C20  | 119.3(3) |
| C7   | C7A  | C3C  | 118.2(3) | C23  | C24  | C25  | 120.2(3) |
| C7   | C7A  | C8   | 119.2(3) | C24  | C23  | C22  | 120.0(3) |
| C7A  | C3C  | C3B  | 124.9(3) | C24  | C25  | C20  | 119.7(3) |
| C7A  | C8   | C8A  | 111.1(2) | C25  | C20  | N2   | 119.2(3) |
| C8A  | C9   | C10  | 120.2(3) | C25  | C20  | C21  | 120.7(3) |
| C8A  | C12A | N12A | 115.9(2) |      |      |      |          |

Table 6 Torsion Angles for **20**.

| A    | B    | C    | D    | Angle/°   |
|------|------|------|------|-----------|
| O1   | C1   | C13A | C3A  | 178.6(3)  |
| O1   | C1   | C13A | C13  | 65.2(4)   |
| O2   | C3   | C3A  | C3B  | -64.8(4)  |
| O2   | C3   | C3A  | C13A | -179.5(3) |
| N2   | C1   | C13A | C3A  | 2.3(3)    |
| N2   | C1   | C13A | C13  | -111.2(3) |
| N2   | C3   | C3A  | C3B  | 114.8(3)  |
| N2   | C3   | C3A  | C13A | 0.1(3)    |
| N2   | C20  | C21  | C22  | 177.9(2)  |
| N2   | C20  | C25  | C24  | -176.9(2) |
| N12A | C3B  | C3C  | C4   | 167.4(2)  |
| N12A | C3B  | C3C  | C7A  | -12.8(4)  |
| N12A | C13  | C13A | C1   | 146.6(2)  |
| N12A | C13  | C13A | C3A  | 32.4(3)   |
| N12A | C13  | C14  | C15  | 30.3(4)   |
| N12A | C13  | C14  | C19  | -149.5(3) |
| C1   | N2   | C3   | O2   | -179.0(3) |
| C1   | N2   | C3   | C3A  | 1.4(3)    |
| C1   | N2   | C20  | C21  | -123.3(3) |
| C1   | N2   | C20  | C25  | 54.1(3)   |
| C3   | N2   | C1   | O1   | -178.9(3) |
| C3   | N2   | C1   | C13A | -2.3(3)   |
| C3   | N2   | C20  | C21  | 57.1(4)   |
| C3   | N2   | C20  | C25  | -125.5(3) |
| C3   | C3A  | C3B  | N12A | -137.8(2) |
| C3   | C3A  | C3B  | C3C  | 94.8(3)   |
| C3   | C3A  | C13A | C1   | -1.4(3)   |
| C3   | C3A  | C13A | C13  | 116.5(2)  |
| C3A  | C3B  | C3C  | C4   | -74.0(3)  |
| C3A  | C3B  | C3C  | C7A  | 105.9(3)  |
| C3B  | N12A | C12A | C8A  | 77.2(3)   |
| C3B  | N12A | C12A | C12  | -106.9(3) |
| C3B  | N12A | C13  | C13A | -49.5(3)  |
| C3B  | N12A | C13  | C14  | -172.3(2) |
| C3B  | C3A  | C13A | C1   | -123.4(2) |
| C3B  | C3A  | C13A | C13  | -5.4(3)   |
| C3C  | C7A  | C8   | C8A  | 57.3(4)   |
| C7   | C7A  | C8   | C8A  | -118.8(3) |
| C7A  | C8   | C8A  | C9   | 109.5(3)  |
| C7A  | C8   | C8A  | C12A | -69.3(4)  |
| C12A | N12A | C3B  | C3A  | -178.2(2) |
| C12A | N12A | C3B  | C3C  | -51.7(3)  |
| C12A | N12A | C13  | C13A | 175.9(2)  |
| C12A | N12A | C13  | C14  | 53.0(3)   |
| C13  | N12A | C3B  | C3A  | 46.1(3)   |
| C13  | N12A | C3B  | C3C  | 172.6(2)  |
| C13  | N12A | C12A | C8A  | -153.4(3) |
| C13  | N12A | C12A | C12  | 22.5(4)   |
| C13A | C3A  | C3B  | N12A | -23.0(3)  |
| C13A | C3A  | C3B  | C3C  | -150.5(3) |
| C13A | C13  | C14  | C15  | -84.5(3)  |
| C13A | C13  | C14  | C19  | 95.7(3)   |
| C14  | C13  | C13A | C1   | -90.1(3)  |
| C14  | C13  | C13A | C3A  | 155.7(2)  |
| C20  | N2   | C1   | O1   | 1.5(4)    |
| C20  | N2   | C1   | C13A | 178.0(2)  |
| C20  | N2   | C3   | O2   | 0.6(4)    |
| C20  | N2   | C3   | C3A  | -179.0(2) |

Table 7 Hydrogen Atom Coordinates ( $\text{\AA}\times 10^4$ ) and Isotropic Displacement Parameters ( $\text{\AA}^2\times 10^3$ ) for **20**.

| Atom | x        | y        | z        | U(eq)  |
|------|----------|----------|----------|--------|
| H3A  | 8860(3)  | 6180(4)  | 3001(10) | 15(8)  |
| H3B  | 8400(2)  | 4280(4)  | 3792(9)  | 16(7)  |
| H4   | 9870(3)  | 2470(4)  | 3366(10) | 28(8)  |
| H5   | 11990(3) | 1570(4)  | 3318(10) | 26(8)  |
| H6   | 13630(3) | 3450(4)  | 3546(10) | 34(9)  |
| H7   | 13110(3) | 6220(4)  | 3844(10) | 27(9)  |
| H8A  | 10460(3) | 8520(4)  | 3823(10) | 23(8)  |
| H8B  | 11760(2) | 8280(3)  | 4107(8)  | 1(6)   |
| H9   | 11510(3) | 8120(4)  | 4910(11) | 34(9)  |
| H10  | 10250(3) | 7730(4)  | 5559(13) | 43(10) |
| H11  | 8180(3)  | 6870(4)  | 5442(11) | 22(8)  |
| H12  | 7350(3)  | 6450(4)  | 4734(10) | 25(9)  |
| H13  | 6670(2)  | 6060(4)  | 3947(9)  | 18(7)  |
| H13A | 7330(2)  | 8150(4)  | 3169(9)  | 13(7)  |
| H15  | 8230(3)  | 10290(4) | 3985(9)  | 21(8)  |
| H16  | 7280(3)  | 12750(4) | 4294(9)  | 12(7)  |
| H18  | 3950(4)  | 10280(5) | 4403(13) | 62(11) |
| H19  | 4900(3)  | 7720(5)  | 4110(13) | 56(11) |
| H21  | 5780(3)  | 1370(4)  | 3144(10) | 18(9)  |
| H22  | 4280(3)  | -420(4)  | 2851(10) | 20(8)  |
| H23  | 2980(3)  | 590(4)   | 2287(10) | 29(9)  |
| H24  | 3210(3)  | 3340(4)  | 2015(10) | 11(8)  |
| H25  | 4710(2)  | 4970(4)  | 2317(9)  | 3(8)   |

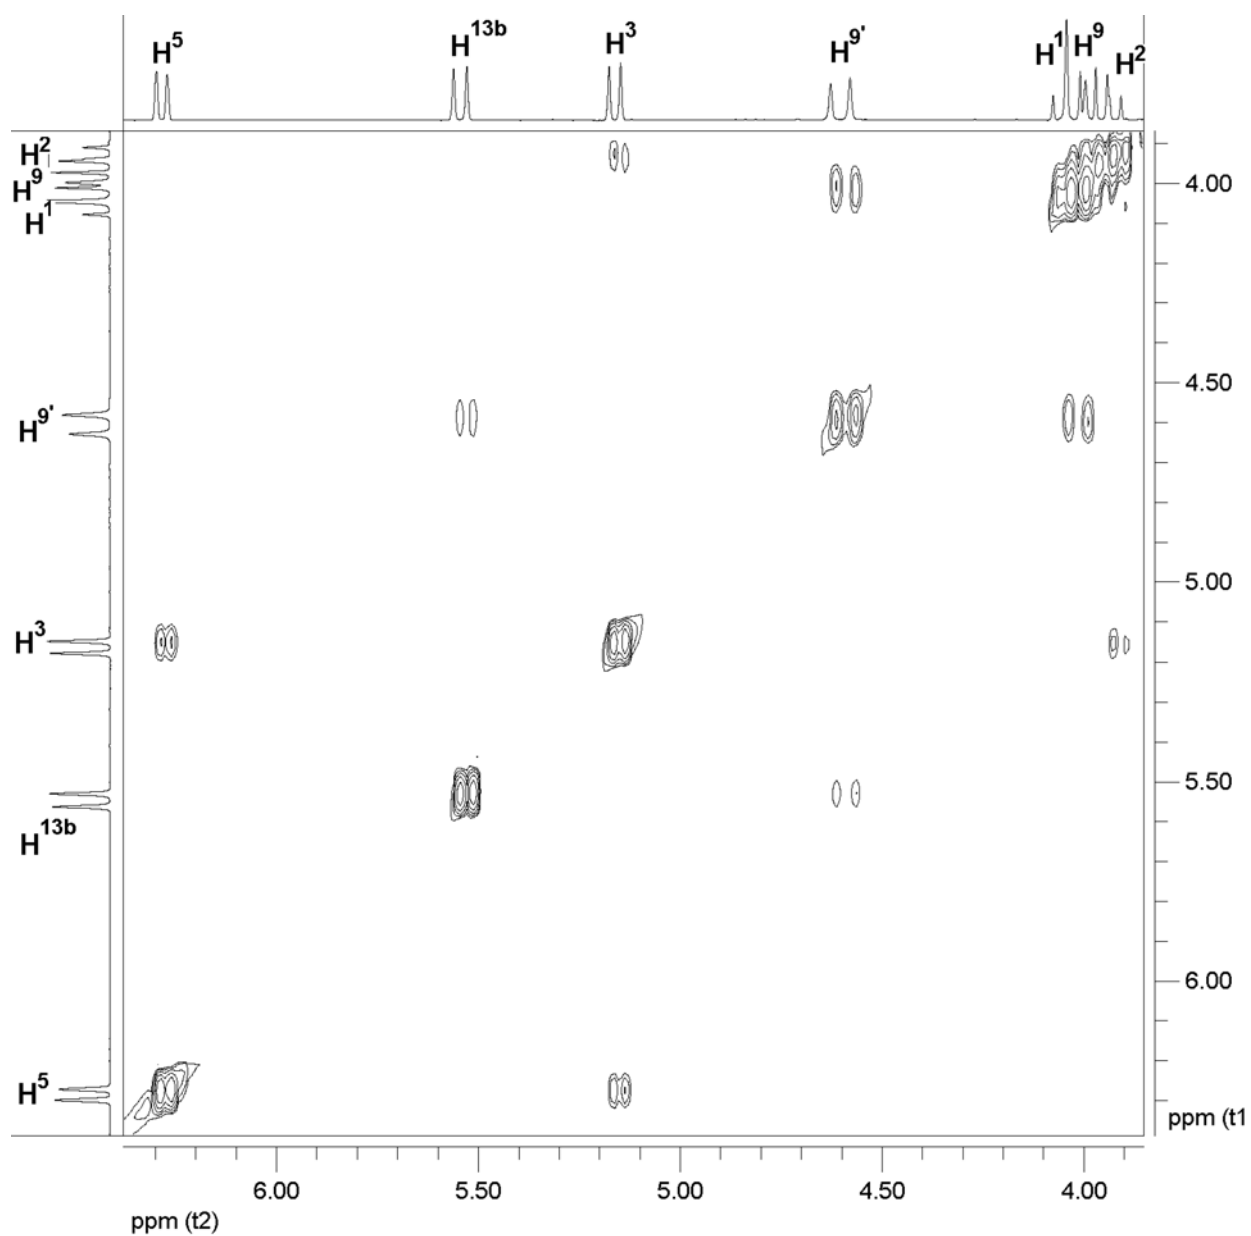

2D  $^1\text{H}$  NOESY spectrum of compound **13**.

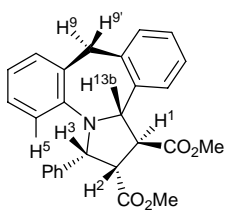



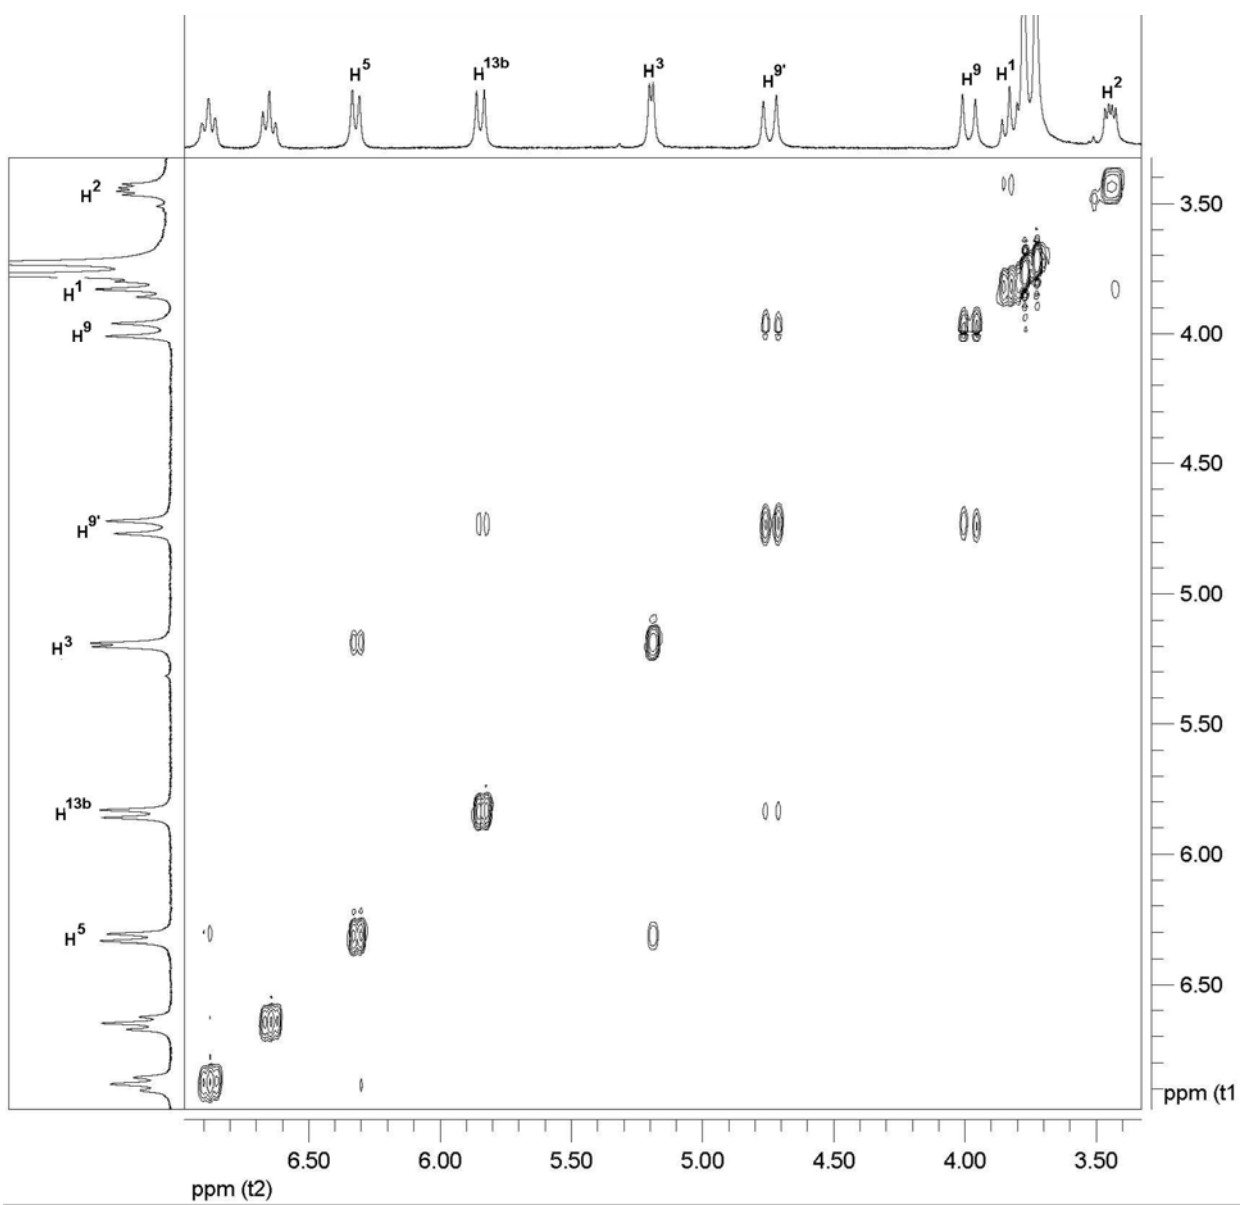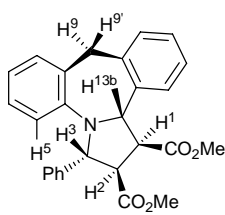

2D  $^1\text{H}$  NOESY spectrum of compound **15**.

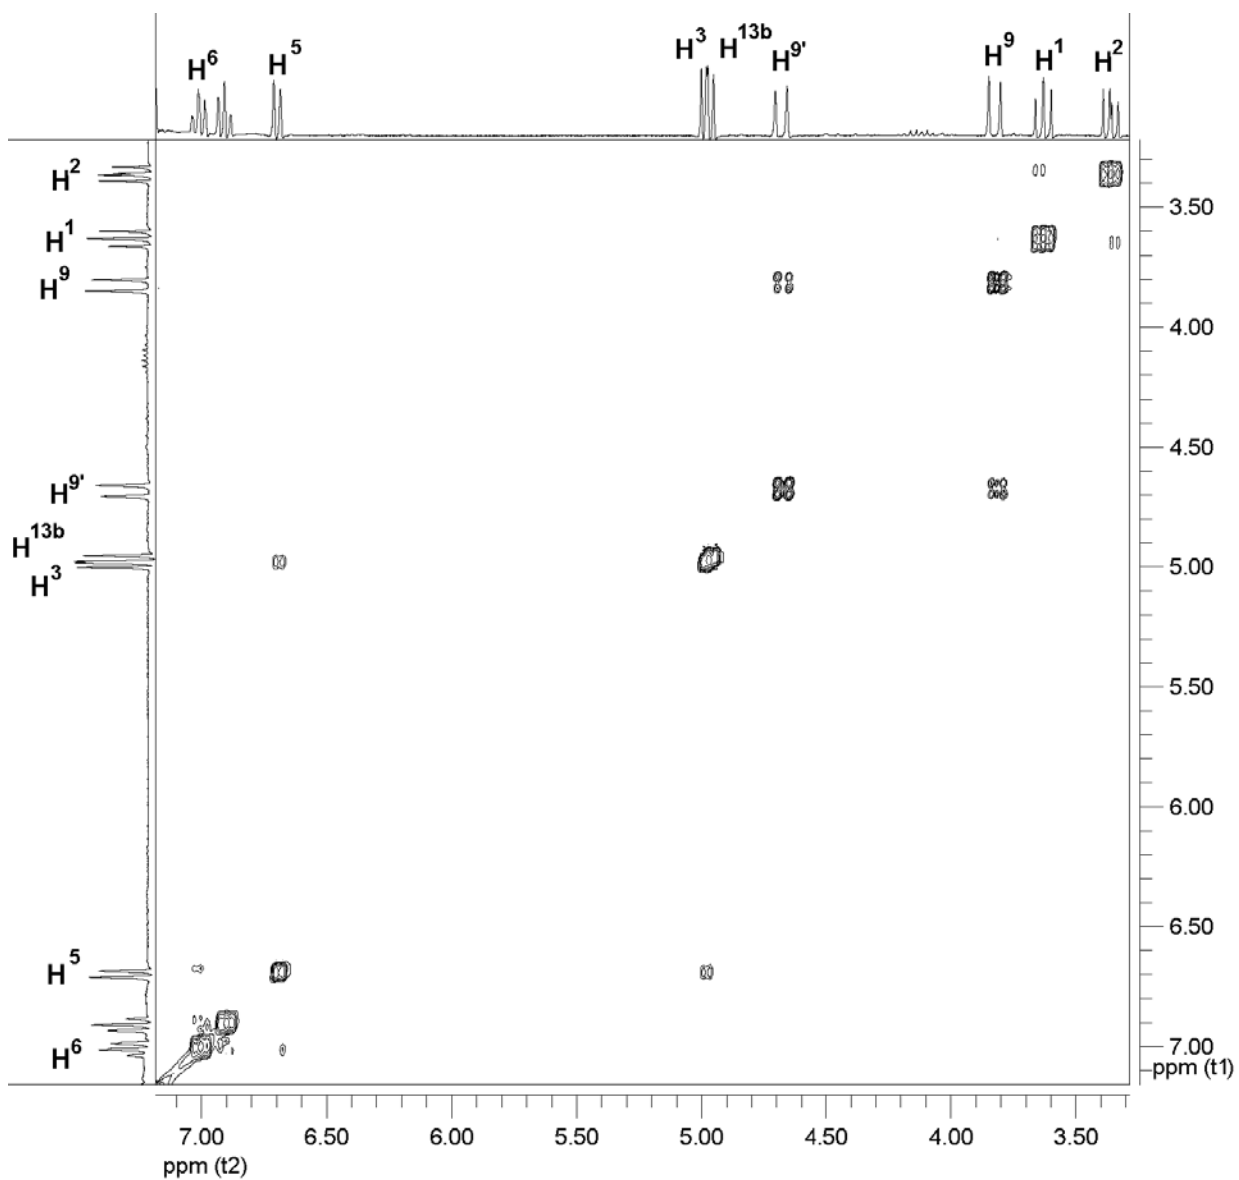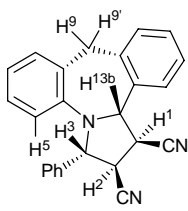

2D  $^1\text{H}$  NOESY spectrum of compound **16**.

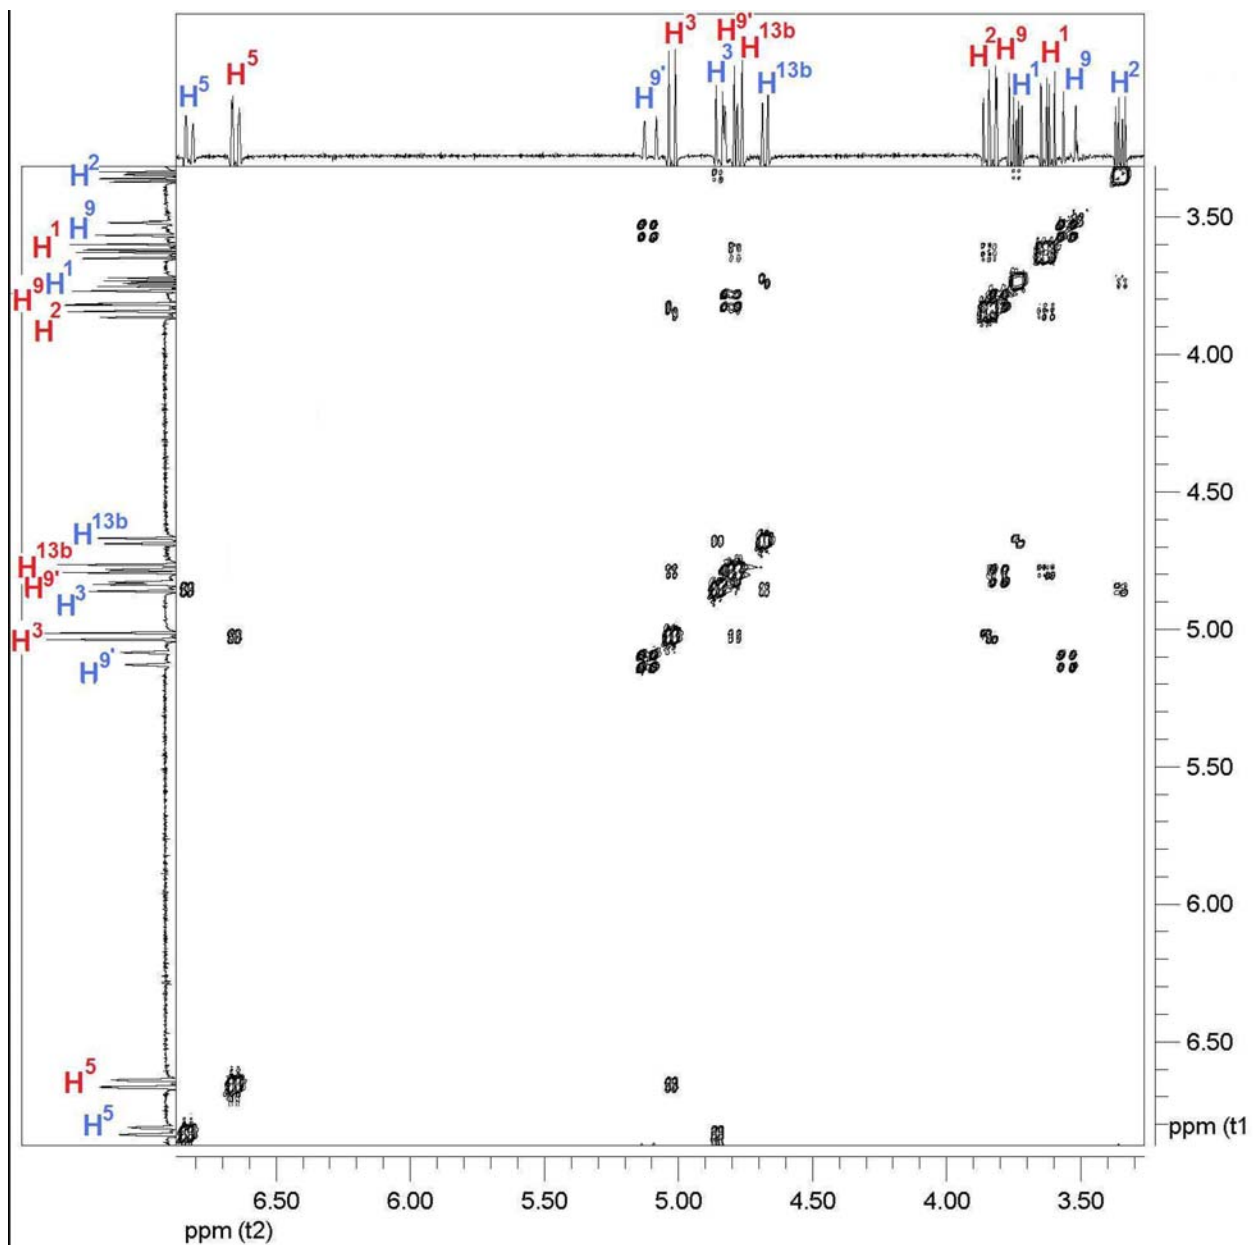

2D  $^1\text{H}$  NOESY spectrum of compound **18**.

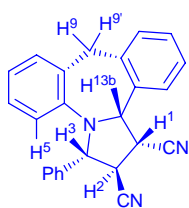

and **19**

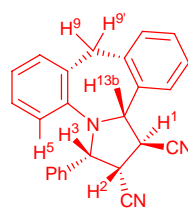

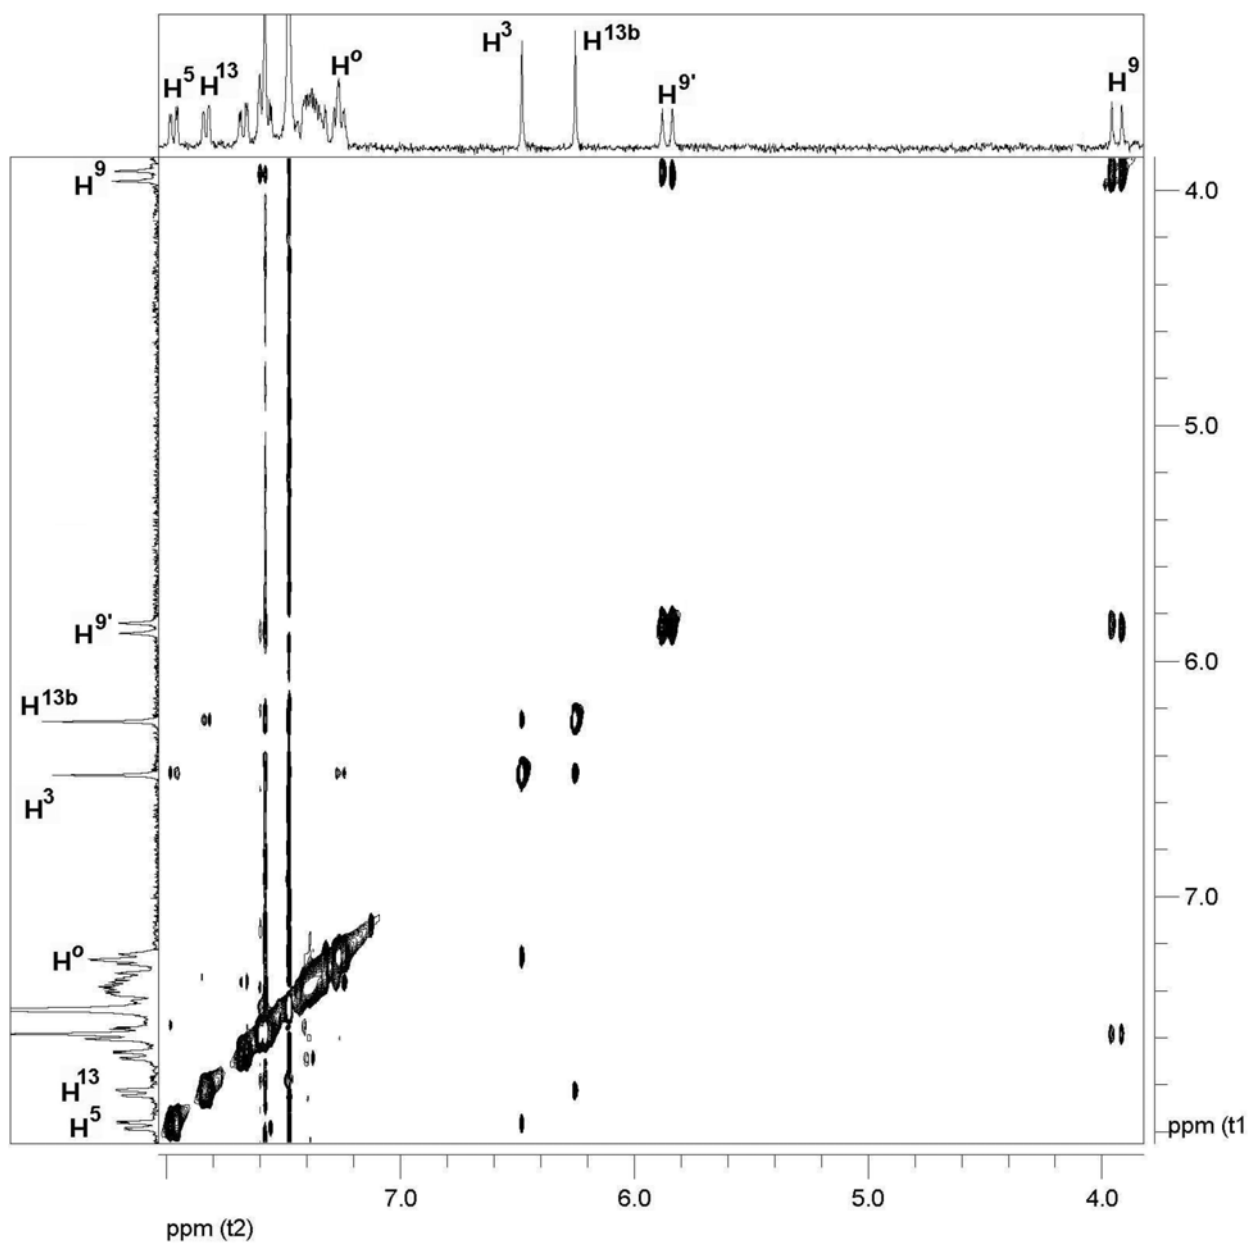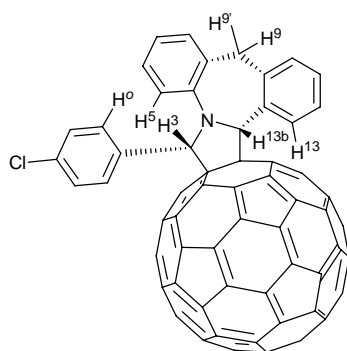

2D  $^1\text{H}$  NOESY spectrum of compound **29**

## Computational Details

All calculations were performed with the B3LYP density functional method<sup>1</sup> by using the Gaussian suite of quantum chemical programs. Geometry optimizations of intermediates, transition states, reactants, and products in the gas phase were performed at the B3LYP/6-31G(d) level using Gaussian 03.<sup>2</sup> Stationary points on the respective potential-energy surfaces were characterized at the same level of theory by evaluating the corresponding Hessian indices. Careful verification of the unique imaginary frequencies for transition states was carried out to check whether the frequency indeed pertains to the desired reaction coordinate. Intrinsic reaction coordinates (IRC) were calculated to authenticate all transition states.

---

<sup>1</sup> (a) Becke, A. D. *J. Chem. Phys.* **1993**, *98*, 5648. (b) Becke, A. D. *Phys. Rev. A* **1998**, *38*, 3098. (c) Lee, C.; Yang, W.; Parr, R. G. *Phys. Rev. B* **1998**, *37*, 785.

<sup>2</sup> Frisch, M.J.; Trucks, G.W. Schlegel, H.B.; Scuseria, G.E.; Robb, M.A.; Cheeseman, J.R.; Montgomery, J.A. Jr.; Vreven, T.; Kudin, K.N.; Burant, J.C.; Millam, J.M.; Iyengar, S. S.; Tomasi, J.; Barone, V.; Mennucci, B.; Cossi, M.; Scalmani, G.; Rega, N.; Petersson, G.A.; Nakatsuji, H.; Hada, M.; Ehara, M.; Toyota, K.; Fukuda, R.; Hasegawa, J.; Ishida, M.; Nakajima, T.; Honda, Y.; Kitao, O.; Nakai, H.; Klene, M.; Li, X.; Knox, J.E.; Hratchian, H.P.; Cross, J.B.; Adamo, C.; Jaramillo, J.; Gomperts, R.; Stratmann, R.E.; Yazyev, O.; Austin, A.J.; Cammi, R.; Pomelli, C.; Ochterski, J.W.; Ayala, P.Y.; Morokuma, K.; Voth, G.A.; Salvador, P.; Dannenberg, J.J.; Zakrzewski, V.G.; Dapprich, S.; Daniels, A.D.; Strain, M.C.; Farkas, O.; Malick, D.K.; Rabuck, A.D.; Raghavachari, K.; Foresman, J. B.; Ortiz, J.V.; Cui, Q.; Baboul, A.G.; Clifford, S.; Cioslowski, J.; Stefanov, B.B.; Liu, G.; Liashenko, A.; Piskorz, P.; Komaromi, I.; Martin, R.L.; Fox, D.J.; Keith, T.; Al-Laham, M. A.; Peng, C.Y.; Nanayakkara, A.; Challacombe, M.; Gill, P.M.W.; Johnson, B.; Chen, W.; Wong, M.W.; Gonzalez, C.; Pople, J.A. Gaussian 03, Revision B.05, Gaussian, Inc., Pittsburgh PA, **2003**.

**Table.** B3LYP/6-31G(d) Absolute Energies (au), Cartesian Coordinates of stationary points of compounds and transition states of isomerizations and cycloadditions

| Compound <i>trans-2a</i>                                                                                                                                |            |            |            | TS of izomerization of compound <i>trans-2a</i> - <i>trans-2a'</i>                                                                                     |            |            |            |
|---------------------------------------------------------------------------------------------------------------------------------------------------------|------------|------------|------------|--------------------------------------------------------------------------------------------------------------------------------------------------------|------------|------------|------------|
| <b>E</b> = -865.199625436, <b>H (0K)</b> = -864.878436,<br><b>H (298K)</b> = -864.861317, <b>G (298K)</b> = -864.923123 au.<br>Imaginary frequency = 0. |            |            |            | <b>E</b> = -865.18142747, <b>H (0K)</b> = -864.860987,<br><b>H (298K)</b> = -864.844338, <b>G (298K)</b> = -864.904832 au.<br>Imaginary frequency = 1. |            |            |            |
| C                                                                                                                                                       | -2.0676550 | 1.3856970  | 0.5392460  | N                                                                                                                                                      | 0.2287100  | 0.6594740  | -0.6831340 |
| C                                                                                                                                                       | -0.7283300 | 1.5243230  | 0.1238180  | C                                                                                                                                                      | -2.0000060 | 1.5654150  | 0.1125260  |
| N                                                                                                                                                       | 0.2846970  | 0.6665370  | 0.6165310  | C                                                                                                                                                      | -0.6662090 | 1.6959120  | -0.3050930 |
| C                                                                                                                                                       | 0.1725060  | -0.7884850 | 0.6827750  | C                                                                                                                                                      | 0.0379930  | -0.7671890 | -0.7463150 |
| C                                                                                                                                                       | -1.0450590 | -1.5424360 | 0.2387550  | C                                                                                                                                                      | -1.1531150 | -1.5940620 | -0.3937110 |
| C                                                                                                                                                       | -2.3265430 | -1.1098600 | 0.6295060  | C                                                                                                                                                      | -2.3827870 | -1.1323070 | 0.0956120  |
| C                                                                                                                                                       | -0.9052250 | -2.7256150 | -0.4942510 | C                                                                                                                                                      | -2.7115260 | 2.7527810  | 0.3845250  |
| C                                                                                                                                                       | -2.0221990 | -3.4838750 | -0.8466110 | C                                                                                                                                                      | -2.1423560 | 4.0139620  | 0.2888120  |
| C                                                                                                                                                       | -3.2932730 | -3.0562460 | -0.4637220 | C                                                                                                                                                      | -0.8050030 | 4.1284660  | -0.1030480 |
| C                                                                                                                                                       | -3.4385410 | -1.8750050 | 0.2658150  | C                                                                                                                                                      | -0.0914100 | 2.9802210  | -0.4053170 |
| C                                                                                                                                                       | -3.0028850 | 2.3294610  | 0.1079620  | C                                                                                                                                                      | -0.9749400 | -2.9784280 | -0.6017150 |
| C                                                                                                                                                       | -2.6404310 | 3.3948510  | -0.7179920 | C                                                                                                                                                      | -1.9682430 | -3.9018640 | -0.3157140 |
| C                                                                                                                                                       | -1.3129150 | 3.5191500  | -1.1282680 | C                                                                                                                                                      | -3.1924860 | -3.4473230 | 0.1829790  |
| C                                                                                                                                                       | -0.3622820 | 2.5914350  | -0.7074640 | C                                                                                                                                                      | -3.3819030 | -2.0865750 | 0.3762020  |
| C                                                                                                                                                       | 1.1125560  | -0.1218380 | -0.2948550 | C                                                                                                                                                      | 0.9491320  | -0.1468820 | 0.3029880  |
| C                                                                                                                                                       | 2.5956250  | -0.1140690 | -0.1260250 | C                                                                                                                                                      | 2.4362910  | -0.2244240 | 0.2472630  |
| C                                                                                                                                                       | 3.1949680  | 0.3800430  | 1.0400350  | C                                                                                                                                                      | 3.1443000  | 0.1641330  | -0.8984310 |
| C                                                                                                                                                       | 3.4106950  | -0.6331470 | -1.1405620 | C                                                                                                                                                      | 4.5332350  | 0.0519620  | -0.9421770 |
| C                                                                                                                                                       | 4.7971540  | -0.6685600 | -0.9902770 | C                                                                                                                                                      | 5.2353670  | -0.4478440 | 0.1574960  |
| C                                                                                                                                                       | 5.3868650  | -0.1808860 | 0.1773620  | C                                                                                                                                                      | 4.5378260  | -0.8317300 | 1.3041800  |
| C                                                                                                                                                       | 4.5809830  | 0.3454870  | 1.1896960  | C                                                                                                                                                      | 3.1479890  | -0.7191420 | 1.3481930  |
| H                                                                                                                                                       | 0.6447260  | -1.1887770 | 1.5834230  | H                                                                                                                                                      | 0.5743110  | -1.1864370 | -1.5998370 |
| H                                                                                                                                                       | 0.0894680  | -3.0537170 | -0.7867900 | H                                                                                                                                                      | -3.7503930 | 2.6643270  | 0.6978200  |
| H                                                                                                                                                       | -1.8992360 | -4.4006340 | -1.4168160 | H                                                                                                                                                      | -2.7334670 | 4.8973500  | 0.5138690  |
| H                                                                                                                                                       | -4.1711570 | -3.6369230 | -0.7344110 | H                                                                                                                                                      | -0.3330340 | 5.1032410  | -0.1906300 |
| H                                                                                                                                                       | -4.4312500 | -1.5393680 | 0.5572080  | H                                                                                                                                                      | 0.9381130  | 3.0371600  | -0.7449390 |
| H                                                                                                                                                       | -4.0386730 | 2.2194840  | 0.4223290  | H                                                                                                                                                      | -0.0213560 | -3.3215640 | -0.9968750 |
| H                                                                                                                                                       | -3.3878420 | 4.1144610  | -1.0397780 | H                                                                                                                                                      | -1.7957080 | -4.9612370 | -0.4841960 |
| H                                                                                                                                                       | -1.0121170 | 4.3404080  | -1.7734630 | H                                                                                                                                                      | -3.9926310 | -4.1466940 | 0.4095540  |
| H                                                                                                                                                       | 0.6773100  | 2.6900340  | -1.0078350 | H                                                                                                                                                      | -4.3396920 | -1.7330340 | 0.7535940  |
| H                                                                                                                                                       | 0.7697670  | -0.1549310 | -1.3303320 | H                                                                                                                                                      | 0.5248040  | -0.1583930 | 1.3089270  |
| H                                                                                                                                                       | 2.5631600  | 0.8064840  | 1.8138500  | H                                                                                                                                                      | 2.5930230  | 0.5689880  | -1.7423420 |
| H                                                                                                                                                       | 2.9553220  | -1.0108090 | -2.0538920 | H                                                                                                                                                      | 5.0703870  | 0.3604650  | -1.8355430 |
| H                                                                                                                                                       | 5.4162430  | -1.0728430 | -1.7869530 | H                                                                                                                                                      | 6.3182630  | -0.5324680 | 0.1225960  |
| H                                                                                                                                                       | 6.4669210  | -0.2052970 | 0.2951950  | H                                                                                                                                                      | 5.0755480  | -1.2155590 | 2.1673140  |
| H                                                                                                                                                       | 5.0340370  | 0.7360890  | 2.0973470  | H                                                                                                                                                      | 2.6084410  | -1.0174330 | 2.2446690  |
| C                                                                                                                                                       | -2.4830370 | 0.1969220  | 1.3880040  | C                                                                                                                                                      | -2.8034830 | 0.3006240  | 0.3824100  |
| H                                                                                                                                                       | -3.5254140 | 0.3183720  | 1.6998030  | H                                                                                                                                                      | -3.0609440 | 0.3317390  | 1.4521370  |
| H                                                                                                                                                       | -1.8819970 | 0.1681250  | 2.3077120  | H                                                                                                                                                      | -3.7686230 | 0.4389930  | -0.1241590 |
| Compound <i>trans-2a'</i>                                                                                                                               |            |            |            | TS of izomerization of compound <i>trans-2a'</i> – ylide <b>22</b>                                                                                     |            |            |            |
| <b>E</b> = -865.19074519, <b>H (0K)</b> = -864.869430,<br><b>H (298K)</b> = -864.852323, <b>G (298K)</b> = -864.914022 au.<br>Imaginary frequency = 0.  |            |            |            | <b>E</b> = -865.12709372, <b>H (0K)</b> = -864.809585,<br><b>H (298K)</b> = -864.844338, <b>G (298K)</b> = -864.904832 au.<br>Imaginary frequency = 1. |            |            |            |
| N                                                                                                                                                       | 0.3199310  | 0.6847720  | -0.6310490 | N                                                                                                                                                      | -0.0083040 | -0.8577040 | -0.4632930 |
| C                                                                                                                                                       | -1.7910430 | 1.3575160  | 0.6106450  | C                                                                                                                                                      | 2.2050830  | -0.9252260 | 0.5291830  |
| C                                                                                                                                                       | -0.7353510 | 1.5947600  | -0.2956390 | C                                                                                                                                                      | 1.2271500  | -1.5601090 | -0.2614150 |
| C                                                                                                                                                       | 0.1820690  | -0.7749510 | -0.6915090 | C                                                                                                                                                      | 0.0213900  | 0.3789440  | -1.1428960 |
| C                                                                                                                                                       | -1.0606580 | -1.5536450 | -0.4076020 | C                                                                                                                                                      | 0.5666580  | 1.5874460  | -0.5976480 |
| C                                                                                                                                                       | -2.0502670 | -1.1907570 | 0.5315110  | C                                                                                                                                                      | 1.5113180  | 1.6101330  | 0.4758210  |
| C                                                                                                                                                       | -2.7382940 | 2.3722940  | 0.8010840  | C                                                                                                                                                      | 3.4335210  | -1.5744720 | 0.6853600  |
| C                                                                                                                                                       | -2.6589160 | 3.5946050  | 0.1355310  | C                                                                                                                                                      | 3.6814530  | -2.8081350 | 0.0768660  |
| C                                                                                                                                                       | -1.6123770 | 3.8215790  | -0.7563280 | C                                                                                                                                                      | 2.6943820  | -3.4245720 | -0.6915690 |

|                                                                                                                            |            |            |            |                                                                                                                             |            |            |            |
|----------------------------------------------------------------------------------------------------------------------------|------------|------------|------------|-----------------------------------------------------------------------------------------------------------------------------|------------|------------|------------|
| C                                                                                                                          | -0.6655770 | 2.8221200  | -0.9673720 | C                                                                                                                           | 1.4573510  | -2.7979390 | -0.8568210 |
| C                                                                                                                          | -1.2386080 | -2.7278900 | -1.1555350 | C                                                                                                                           | 0.2949610  | 2.8076850  | -1.2681350 |
| C                                                                                                                          | -2.3517440 | -3.5474630 | -0.9836990 | C                                                                                                                           | 0.8925490  | 4.0014250  | -0.8917080 |
| C                                                                                                                          | -3.3269040 | -3.1896580 | -0.0556440 | C                                                                                                                           | 1.7927220  | 4.0222830  | 0.1769340  |
| C                                                                                                                          | -3.1685000 | -2.0182210 | 0.6844940  | C                                                                                                                           | 2.0896330  | 2.8278060  | 0.8375480  |
| C                                                                                                                          | 1.0543400  | -0.1104430 | 0.3524840  | C                                                                                                                           | -0.9465800 | -0.7367440 | 0.5259310  |
| C                                                                                                                          | 2.5459870  | -0.1313200 | 0.2731000  | C                                                                                                                           | -2.3671330 | -0.5738490 | 0.3293410  |
| C                                                                                                                          | 3.2248260  | 0.3228210  | -0.8651340 | C                                                                                                                           | -3.0222460 | -0.7137270 | -0.9191480 |
| C                                                                                                                          | 4.6164050  | 0.2610250  | -0.9286720 | C                                                                                                                           | -4.4035520 | -0.6508590 | -1.0051750 |
| C                                                                                                                          | 5.3495280  | -0.2540970 | 0.1430670  | C                                                                                                                           | -5.1859150 | -0.4271280 | 0.1382600  |
| C                                                                                                                          | 4.6803810  | -0.7040410 | 1.2826770  | C                                                                                                                           | -4.5579820 | -0.2811270 | 1.3749090  |
| C                                                                                                                          | 3.2882550  | -0.6412810 | 1.3464050  | C                                                                                                                           | -3.1705820 | -0.3567570 | 1.4716200  |
| H                                                                                                                          | 0.7301150  | -1.1822860 | -1.5416700 | H                                                                                                                           | -0.2182430 | 0.3601160  | -2.2047230 |
| H                                                                                                                          | -3.5577080 | 2.1948070  | 1.4943160  | H                                                                                                                           | 4.2067150  | -1.1094850 | 1.2924630  |
| H                                                                                                                          | -3.4109330 | 4.3587300  | 0.3125290  | H                                                                                                                           | 4.6476630  | -3.2878370 | 0.2082350  |
| H                                                                                                                          | -1.5329960 | 4.7662610  | -1.2873410 | H                                                                                                                           | 2.8842910  | -4.3859060 | -1.1607220 |
| H                                                                                                                          | 0.1567040  | 2.9674010  | -1.6607420 | H                                                                                                                           | 0.6704160  | -3.2517110 | -1.4519110 |
| H                                                                                                                          | -0.4823100 | -3.0005670 | -1.8878170 | H                                                                                                                           | -0.4093370 | 2.7917770  | -2.0966060 |
| H                                                                                                                          | -2.4564410 | -4.4522550 | -1.5761110 | H                                                                                                                           | 0.6541150  | 4.9173920  | -1.4265290 |
| H                                                                                                                          | -4.2068990 | -3.8102460 | 0.0897610  | H                                                                                                                           | 2.2700210  | 4.9487210  | 0.4831970  |
| H                                                                                                                          | -3.9329450 | -1.7342660 | 1.4042450  | H                                                                                                                           | 2.8128270  | 2.8384070  | 1.6511410  |
| H                                                                                                                          | 0.6720360  | -0.1411450 | 1.3698160  | H                                                                                                                           | -0.6225510 | -0.8888580 | 1.5589620  |
| H                                                                                                                          | 2.6477190  | 0.7398050  | -1.6850660 | H                                                                                                                           | -2.4305280 | -0.8776910 | -1.8139630 |
| H                                                                                                                          | 5.1311530  | 0.6210900  | -1.8159510 | H                                                                                                                           | -4.8837610 | -0.7738310 | -1.9727460 |
| H                                                                                                                          | 6.4341600  | -0.2999730 | 0.0923750  | H                                                                                                                           | -6.2675560 | -0.3664150 | 0.0588760  |
| H                                                                                                                          | 5.2418080  | -1.1008380 | 2.1246260  | H                                                                                                                           | -5.1490310 | -0.1081560 | 2.2705350  |
| H                                                                                                                          | 2.7712460  | -0.9919830 | 2.2374030  | H                                                                                                                           | -2.6903980 | -0.2464790 | 2.4411590  |
| C                                                                                                                          | -1.9505350 | 0.0609190  | 1.3863680  | C                                                                                                                           | 1.9033840  | 0.3716630  | 1.2682110  |
| H                                                                                                                          | -1.1394190 | -0.0474750 | 2.1189630  | H                                                                                                                           | 1.0994540  | 0.1609960  | 1.9963420  |
| H                                                                                                                          | -2.8629090 | 0.1363100  | 1.9866020  | H                                                                                                                           | 2.7786350  | 0.6224520  | 1.8765100  |
| Ylide 22                                                                                                                   |            |            |            | TS of izomerization of compound <i>trans</i> -2a – ylide 21                                                                 |            |            |            |
| E = -865.14222285, H (OK) = -864.822991,<br>H (298K) = -864.805497, G (298K) = -864.867509 au.<br>Imaginary frequency = 0. |            |            |            | E = -865.150978123, H (OK) = -864.832530,<br>H (298K) = -864.815359, G (298K) = -864.876971 au.<br>Imaginary frequency = 1. |            |            |            |
| N                                                                                                                          | 0.3744300  | -0.8829440 | -0.6342660 | C                                                                                                                           | -1.3723040 | 1.7388510  | 0.4178950  |
| C                                                                                                                          | 2.3446850  | -0.3358350 | 0.5803300  | C                                                                                                                           | -0.1603230 | 1.2358270  | -0.0970020 |
| C                                                                                                                          | 1.7630030  | -1.1979820 | -0.3703690 | N                                                                                                                           | 0.2285700  | -0.1114760 | 0.0941420  |
| C                                                                                                                          | 0.2465120  | 0.2796370  | -1.3870340 | C                                                                                                                           | -0.4983310 | -1.2036350 | 0.5066110  |
| C                                                                                                                          | 0.0948770  | 1.5454190  | -0.6757230 | C                                                                                                                           | -1.9162870 | -1.4043060 | 0.2189780  |
| C                                                                                                                          | 0.7025260  | 1.7345480  | 0.6013160  | C                                                                                                                           | -2.8331180 | -0.3611560 | 0.4924050  |
| C                                                                                                                          | 3.7033950  | -0.5024190 | 0.8453030  | C                                                                                                                           | -2.3947280 | -2.6301950 | -0.2743280 |
| C                                                                                                                          | 4.4508600  | -1.4818870 | 0.1766930  | C                                                                                                                           | -3.7485910 | -2.8054750 | -0.5521730 |
| C                                                                                                                          | 3.8439100  | -2.3224600 | -0.7542760 | C                                                                                                                           | -4.6443250 | -1.7576110 | -0.3296660 |
| C                                                                                                                          | 2.4779700  | -2.1881000 | -1.0302110 | C                                                                                                                           | -4.1847580 | -0.5492860 | 0.1994370  |
| C                                                                                                                          | -0.5169260 | 2.6543580  | -1.2963920 | C                                                                                                                           | -1.6829650 | 3.0828560  | 0.1809080  |
| C                                                                                                                          | -0.5713200 | 3.9005800  | -0.6817890 | C                                                                                                                           | -0.8323180 | 3.9255040  | -0.5312660 |
| C                                                                                                                          | -0.0177220 | 4.0703370  | 0.5886240  | C                                                                                                                           | 0.3600410  | 3.4096530  | -1.0425150 |
| C                                                                                                                          | 0.6145290  | 2.9919120  | 1.2084900  | C                                                                                                                           | 0.6851190  | 2.0736290  | -0.8408650 |
| C                                                                                                                          | -0.5457950 | -1.4380090 | 0.1671350  | C                                                                                                                           | 1.2304610  | -0.7956370 | -0.6022560 |
| C                                                                                                                          | -1.9706150 | -1.2587380 | 0.1692080  | C                                                                                                                           | 2.6129630  | -0.7835820 | -0.2104640 |
| C                                                                                                                          | -2.6933730 | -0.3352200 | -0.6254830 | C                                                                                                                           | 3.0625070  | -0.1153310 | 0.9528680  |
| C                                                                                                                          | -4.0865950 | -0.3637350 | -0.6433500 | C                                                                                                                           | 3.5738540  | -1.4688450 | -0.9923800 |
| C                                                                                                                          | -4.7984310 | -1.2532250 | 0.1620070  | C                                                                                                                           | 4.9181030  | -1.4619700 | -0.6419900 |
| C                                                                                                                          | -4.0996530 | -2.1447330 | 0.9868390  | C                                                                                                                           | 5.3486660  | -0.7792940 | 0.5013870  |
| C                                                                                                                          | -2.7139340 | -2.1506110 | 0.9872460  | C                                                                                                                           | 4.4111590  | -0.1081310 | 1.2927770  |
| H                                                                                                                          | 0.8993950  | 0.2836450  | -2.2565570 | H                                                                                                                           | 0.0429180  | -1.9272150 | 1.1045120  |
| H                                                                                                                          | 4.1867220  | 0.1368470  | 1.5802380  | H                                                                                                                           | -1.6892840 | -3.4360020 | -0.4608030 |
| H                                                                                                                          | 5.5108620  | -1.5865090 | 0.3910500  | H                                                                                                                           | -4.1026920 | -3.7535540 | -0.9478910 |
| H                                                                                                                          | 4.4263230  | -3.0827020 | -1.2671090 | H                                                                                                                           | -5.7010730 | -1.8860920 | -0.5477980 |

|                                                                                                                                                         |            |            |            |                                                                                                                                                         |            |            |            |
|---------------------------------------------------------------------------------------------------------------------------------------------------------|------------|------------|------------|---------------------------------------------------------------------------------------------------------------------------------------------------------|------------|------------|------------|
| H                                                                                                                                                       | 1.9801130  | -2.8262800 | -1.7540750 | H                                                                                                                                                       | -4.8908800 | 0.2500960  | 0.4130020  |
| H                                                                                                                                                       | -0.9538470 | 2.5130180  | -2.2822830 | H                                                                                                                                                       | -2.6203260 | 3.4717630  | 0.5726350  |
| H                                                                                                                                                       | -1.0528920 | 4.7343070  | -1.1866950 | H                                                                                                                                                       | -1.1020530 | 4.9649310  | -0.6941820 |
| H                                                                                                                                                       | -0.0607670 | 5.0351200  | 1.0866320  | H                                                                                                                                                       | 1.0334750  | 4.0426390  | -1.6139800 |
| H                                                                                                                                                       | 1.0789330  | 3.1374770  | 2.1824660  | H                                                                                                                                                       | 1.5932570  | 1.6579220  | -1.2639820 |
| H                                                                                                                                                       | -0.1422550 | -2.1900100 | 0.8378580  | H                                                                                                                                                       | 0.9132230  | -1.3926680 | -1.4513850 |
| H                                                                                                                                                       | -2.1578400 | 0.3930120  | -1.2169090 | H                                                                                                                                                       | 2.3374230  | 0.3921640  | 1.5823490  |
| H                                                                                                                                                       | -4.6211880 | 0.3436990  | -1.2720540 | H                                                                                                                                                       | 3.2465510  | -2.0003140 | -1.8833310 |
| H                                                                                                                                                       | -5.8848990 | -1.2424910 | 0.1648300  | H                                                                                                                                                       | 5.6375350  | -1.9921770 | -1.2610980 |
| H                                                                                                                                                       | -4.6417590 | -2.8378590 | 1.6246960  | H                                                                                                                                                       | 6.3999010  | -0.7776940 | 0.7756190  |
| H                                                                                                                                                       | -2.1787920 | -2.8618740 | 1.6126100  | H                                                                                                                                                       | 4.7345270  | 0.4163120  | 2.1886240  |
| C                                                                                                                                                       | 1.4667000  | 0.6414750  | 1.3529940  | C                                                                                                                                                       | -2.3346570 | 0.8759230  | 1.2135840  |
| H                                                                                                                                                       | 0.7340040  | 0.0317860  | 1.9145430  | H                                                                                                                                                       | -3.1888900 | 1.4921280  | 1.5126340  |
| H                                                                                                                                                       | 2.0892560  | 1.1275500  | 2.1112720  | H                                                                                                                                                       | -1.8446200 | 0.5513690  | 2.1444110  |
| Ylide 21                                                                                                                                                |            |            |            | Ylide 23                                                                                                                                                |            |            |            |
| <b>E</b> = -865.171796466, <b>H (0K)</b> = -864.852018,<br><b>H (298K)</b> = -864.834471, <b>G (298K)</b> = -864.896597 au.<br>Imaginary frequency = 0. |            |            |            | <b>E</b> = -865.176344605, <b>H (0K)</b> = -864.855851,<br><b>H (298K)</b> = -864.838437, <b>G (298K)</b> = -864.900468 au.<br>Imaginary frequency = 0. |            |            |            |
| C                                                                                                                                                       | 0.7558110  | 1.3503840  | -0.4596990 | C                                                                                                                                                       | -1.7710160 | 1.3393430  | 0.7426070  |
| C                                                                                                                                                       | -0.0351010 | 0.5584560  | 0.3803340  | C                                                                                                                                                       | -0.7075940 | 1.4795130  | -0.1576750 |
| N                                                                                                                                                       | -0.0963110 | -0.8909430 | 0.2188980  | N                                                                                                                                                       | 0.3364820  | 0.4637930  | -0.2305880 |
| C                                                                                                                                                       | 1.0732070  | -1.5936190 | 0.2763930  | C                                                                                                                                                       | -0.0150570 | -0.8185650 | -0.5455760 |
| C                                                                                                                                                       | 2.4157130  | -1.1213620 | 0.0950230  | C                                                                                                                                                       | -1.2863610 | -1.4578290 | -0.3556700 |
| C                                                                                                                                                       | 2.7648100  | -0.0301120 | -0.7500890 | C                                                                                                                                                       | -2.2292050 | -1.0836170 | 0.6426740  |
| C                                                                                                                                                       | 3.4716420  | -1.8590190 | 0.6874140  | C                                                                                                                                                       | -1.5842080 | -2.5953630 | -1.1472050 |
| C                                                                                                                                                       | 4.7996610  | -1.5053800 | 0.4956080  | C                                                                                                                                                       | -2.7697770 | -3.2996550 | -0.9897100 |
| C                                                                                                                                                       | 5.1267100  | -0.4006390 | -0.2984390 | C                                                                                                                                                       | -3.7057100 | -2.8979100 | -0.0311870 |
| C                                                                                                                                                       | 4.1036030  | 0.3222940  | -0.9140770 | C                                                                                                                                                       | -3.4208040 | -1.7941200 | 0.7751500  |
| C                                                                                                                                                       | 0.7661320  | 2.7347300  | -0.2425470 | C                                                                                                                                                       | -2.7373950 | 2.3516740  | 0.7829090  |
| C                                                                                                                                                       | 0.0240810  | 3.3121730  | 0.7839250  | C                                                                                                                                                       | -2.6519810 | 3.4698090  | -0.0434900 |
| C                                                                                                                                                       | -0.7305090 | 2.5006550  | 1.6346800  | C                                                                                                                                                       | -1.5970710 | 3.5814950  | -0.9503870 |
| C                                                                                                                                                       | -0.7602780 | 1.1248890  | 1.4332690  | C                                                                                                                                                       | -0.6260670 | 2.5843840  | -1.0099630 |
| C                                                                                                                                                       | -1.3068840 | -1.5093180 | 0.2680230  | C                                                                                                                                                       | 1.6082580  | 0.9297070  | -0.1214710 |
| C                                                                                                                                                       | -2.6162570 | -0.9957680 | -0.0372590 | C                                                                                                                                                       | 2.8424590  | 0.2018250  | -0.0120040 |
| C                                                                                                                                                       | -2.9135490 | 0.2052570  | -0.7308910 | C                                                                                                                                                       | 3.0013620  | -1.1859460 | 0.2398910  |
| C                                                                                                                                                       | -3.7191920 | -1.8117600 | 0.3293610  | C                                                                                                                                                       | 4.0322510  | 0.9781930  | -0.0796870 |
| C                                                                                                                                                       | -5.0272280 | -1.4470200 | 0.0394830  | C                                                                                                                                                       | 5.2868710  | 0.4121780  | 0.0855760  |
| C                                                                                                                                                       | -5.2980740 | -0.2498940 | -0.6305560 | C                                                                                                                                                       | 5.4186700  | -0.9587240 | 0.3374110  |
| C                                                                                                                                                       | -4.2279870 | 0.5628600  | -1.0139440 | C                                                                                                                                                       | 4.2659810  | -1.7402580 | 0.4244690  |
| H                                                                                                                                                       | 0.9293960  | -2.6529740 | 0.4655620  | H                                                                                                                                                       | 0.7734660  | -1.3866740 | -1.0183330 |
| H                                                                                                                                                       | 3.2239320  | -2.7096610 | 1.3179690  | H                                                                                                                                                       | -0.8663090 | -2.9075530 | -1.9022010 |
| H                                                                                                                                                       | 5.5848350  | -2.0861470 | 0.9728240  | H                                                                                                                                                       | -2.9695230 | -4.1622830 | -1.6202910 |
| H                                                                                                                                                       | 6.1642740  | -0.1168930 | -0.4493430 | H                                                                                                                                                       | -4.6364220 | -3.4432440 | 0.0959040  |
| H                                                                                                                                                       | 4.3494400  | 1.1629050  | -1.5598060 | H                                                                                                                                                       | -4.1302550 | -1.4893530 | 1.5419390  |
| H                                                                                                                                                       | 1.3764480  | 3.3587950  | -0.8904530 | H                                                                                                                                                       | -3.5678390 | 2.2513860  | 1.4770960  |
| H                                                                                                                                                       | 0.0429710  | 4.3888590  | 0.9278960  | H                                                                                                                                                       | -3.4109290 | 4.2451330  | 0.0120690  |
| H                                                                                                                                                       | -1.2959370 | 2.9356710  | 2.4534080  | H                                                                                                                                                       | -1.5300600 | 4.4368470  | -1.6162640 |
| H                                                                                                                                                       | -1.3470890 | 0.4812050  | 2.0784910  | H                                                                                                                                                       | 0.1886100  | 2.6504430  | -1.7235030 |
| H                                                                                                                                                       | -1.2332330 | -2.5727960 | 0.4719130  | H                                                                                                                                                       | 1.6734780  | 2.0074950  | -0.0816270 |
| H                                                                                                                                                       | -2.1120400 | 0.8502440  | -1.0708010 | H                                                                                                                                                       | 2.1361260  | -1.8290690 | 0.3357050  |
| H                                                                                                                                                       | -3.5273200 | -2.7450350 | 0.8543230  | H                                                                                                                                                       | 3.9473840  | 2.0468100  | -0.2645020 |
| H                                                                                                                                                       | -5.8426220 | -2.1000260 | 0.3411790  | H                                                                                                                                                       | 6.1706390  | 1.0418940  | 0.0189230  |
| H                                                                                                                                                       | -6.3205280 | 0.0388070  | -0.8566690 | H                                                                                                                                                       | 6.4008000  | -1.4060530 | 0.4606300  |
| H                                                                                                                                                       | -4.4167560 | 1.4883530  | -1.5528800 | H                                                                                                                                                       | 4.3474490  | -2.8046920 | 0.6311100  |
| C                                                                                                                                                       | 1.6572330  | 0.6988130  | -1.4782030 | C                                                                                                                                                       | -1.8969630 | 0.0762480  | 1.5577500  |
| H                                                                                                                                                       | 2.0714110  | 1.4523600  | -2.1550520 | H                                                                                                                                                       | -2.6715580 | 0.1960250  | 2.3216940  |
| H                                                                                                                                                       | 1.0857460  | -0.0167760 | -2.0877010 | H                                                                                                                                                       | -0.9502880 | -0.1279470 | 2.0792850  |
| TS of izomerization of compound ylide 23 – <i>cis</i> -2a'                                                                                              |            |            |            | Compound <i>cis</i> -2a'                                                                                                                                |            |            |            |



|                                                                                                                                          |            |            |            |                                                                                                                                          |            |            |            |
|------------------------------------------------------------------------------------------------------------------------------------------|------------|------------|------------|------------------------------------------------------------------------------------------------------------------------------------------|------------|------------|------------|
| <b>E = -865.14126062, H (0K) = -864.823295,</b><br><b>H (298K) = -864.806016, G (298K) = -864.868107 au.</b><br>Imaginary frequency = 1. |            |            |            | <b>E = -865.17786150, H (0K) = -864.857111,</b><br><b>H (298K) = -864.839875, G (298K) = -864.901971 au.</b><br>Imaginary frequency = 0. |            |            |            |
| C                                                                                                                                        | 2.1475750  | -0.7785630 | 0.6209230  | C                                                                                                                                        | 2.6100830  | -0.2750630 | 0.3832130  |
| C                                                                                                                                        | 1.3351190  | -1.4989890 | -0.2754320 | C                                                                                                                                        | 1.6913710  | -1.3015440 | 0.0595480  |
| N                                                                                                                                        | 0.1462840  | -0.8462840 | -0.6764170 | N                                                                                                                                        | 0.3655380  | -0.8310030 | 0.0569030  |
| C                                                                                                                                        | 0.0647640  | 0.3624020  | -1.3394460 | C                                                                                                                                        | 0.0831130  | 0.1023150  | -1.0147830 |
| C                                                                                                                                        | 0.4613570  | 1.6202820  | -0.7492800 | C                                                                                                                                        | 0.0073520  | 1.5289330  | -0.5951700 |
| C                                                                                                                                        | 1.2366280  | 1.6886290  | 0.4427920  | C                                                                                                                                        | 1.0727940  | 1.9763690  | 0.2196380  |
| C                                                                                                                                        | 0.1708210  | 2.8127760  | -1.4470110 | C                                                                                                                                        | -0.9461120 | 2.4263370  | -1.0799910 |
| C                                                                                                                                        | 0.6090870  | 4.0479050  | -0.9893140 | C                                                                                                                                        | -0.8741080 | 3.7822490  | -0.7604700 |
| C                                                                                                                                        | 1.3670950  | 4.1159810  | 0.1820170  | C                                                                                                                                        | 0.1773220  | 4.2415650  | 0.0315030  |
| C                                                                                                                                        | 1.6758180  | 2.9433870  | 0.8743750  | C                                                                                                                                        | 1.1363060  | 3.3460040  | 0.5082540  |
| C                                                                                                                                        | 3.3819900  | -1.3259580 | 0.9764530  | C                                                                                                                                        | 3.9679620  | -0.5872220 | 0.3632270  |
| C                                                                                                                                        | 3.7812850  | -2.5754160 | 0.4931520  | C                                                                                                                                        | 4.4091170  | -1.8820150 | 0.0575890  |
| C                                                                                                                                        | 2.9372450  | -3.2983090 | -0.3503220 | C                                                                                                                                        | 3.4835510  | -2.8841990 | -0.2230460 |
| C                                                                                                                                        | 1.7110960  | -2.7582210 | -0.7432450 | C                                                                                                                                        | 2.1136040  | -2.5964230 | -0.2272020 |
| C                                                                                                                                        | -1.1334230 | -1.2627010 | -0.9983040 | C                                                                                                                                        | -0.7638930 | -1.1421080 | -0.7929730 |
| C                                                                                                                                        | -2.3349160 | -0.8999700 | -0.2687500 | C                                                                                                                                        | -2.1315650 | -1.1585370 | -0.1904390 |
| C                                                                                                                                        | -2.3509350 | -0.0959740 | 0.8931640  | C                                                                                                                                        | -2.3938540 | -0.6032990 | 1.0687460  |
| C                                                                                                                                        | -3.5674940 | -1.4195870 | -0.7218890 | C                                                                                                                                        | -3.1870590 | -1.7272000 | -0.9151400 |
| C                                                                                                                                        | -4.7564770 | -1.1503730 | -0.0498520 | C                                                                                                                                        | -4.4826720 | -1.7356780 | -0.3978660 |
| C                                                                                                                                        | -4.7542010 | -0.3518180 | 1.0952860  | C                                                                                                                                        | -4.7372270 | -1.1778560 | 0.8559380  |
| C                                                                                                                                        | -3.5409660 | 0.1712970  | 1.5580770  | C                                                                                                                                        | -3.6882980 | -0.6142940 | 1.5864940  |
| H                                                                                                                                        | -0.0897530 | 0.3370190  | -2.4163830 | H                                                                                                                                        | 0.7269530  | -0.0299350 | -1.8920670 |
| H                                                                                                                                        | -0.4145100 | 2.7461530  | -2.3611780 | H                                                                                                                                        | -1.7483310 | 2.0529850  | -1.7112940 |
| H                                                                                                                                        | 0.3650990  | 4.9519310  | -1.5405760 | H                                                                                                                                        | -1.6262730 | 4.4722930  | -1.1329640 |
| H                                                                                                                                        | 1.7234470  | 5.0733530  | 0.5521810  | H                                                                                                                                        | 0.2555640  | 5.2968950  | 0.2796890  |
| H                                                                                                                                        | 2.2792350  | 3.0043110  | 1.7775420  | H                                                                                                                                        | 1.9484110  | 3.7190980  | 1.1292390  |
| H                                                                                                                                        | 4.0243180  | -0.7843680 | 1.6672720  | H                                                                                                                                        | 4.6953010  | 0.1841270  | 0.6078950  |
| H                                                                                                                                        | 4.7405030  | -2.9895410 | 0.7909850  | H                                                                                                                                        | 5.4727730  | -2.1029490 | 0.0515010  |
| H                                                                                                                                        | 3.2369270  | -4.2765660 | -0.7165530 | H                                                                                                                                        | 3.8208620  | -3.8921280 | -0.4500660 |
| H                                                                                                                                        | 1.0553350  | -3.3032610 | -1.4165640 | H                                                                                                                                        | 1.3824780  | -3.3664430 | -0.4579720 |
| H                                                                                                                                        | -1.2489340 | -2.0478680 | -1.7530000 | H                                                                                                                                        | -0.6182040 | -1.8883550 | -1.5794170 |
| H                                                                                                                                        | -1.4219470 | 0.3252580  | 1.2617230  | H                                                                                                                                        | -1.5733550 | -0.1767820 | 1.6361130  |
| H                                                                                                                                        | -3.5809910 | -2.0457030 | -1.6115620 | H                                                                                                                                        | -2.9917460 | -2.1673730 | -1.8909830 |
| H                                                                                                                                        | -5.6890350 | -1.5665640 | -0.4228900 | H                                                                                                                                        | -5.2902560 | -2.1827510 | -0.9716930 |
| H                                                                                                                                        | -5.6805970 | -0.1407810 | 1.6220330  | H                                                                                                                                        | -5.7447820 | -1.1859380 | 1.2631960  |
| H                                                                                                                                        | -3.5243170 | 0.7926180  | 2.4502330  | H                                                                                                                                        | -3.8783750 | -0.1836250 | 2.5662390  |
| C                                                                                                                                        | 1.5932870  | 0.4697250  | 1.2898920  | C                                                                                                                                        | 2.1091270  | 1.0699710  | 0.9177450  |
| H                                                                                                                                        | 2.3044940  | 0.7933110  | 2.0574880  | H                                                                                                                                        | 2.9904160  | 1.6899540  | 1.1177990  |
| H                                                                                                                                        | 0.6882010  | 0.1556610  | 1.8344590  | H                                                                                                                                        | 1.6783140  | 0.8481190  | 1.9075800  |
| <b>TS of isomerization of compound <i>cis</i>-2a – <i>cis</i>-2a</b>                                                                     |            |            |            | <b>Compound <i>cis</i>-2a</b>                                                                                                            |            |            |            |
| <b>E = -865.17104105, H (0K) = -864.850585,</b><br><b>H (298K) = -864.834022, G (298K) = -864.894118 au.</b><br>Imaginary frequency = 1. |            |            |            | <b>E = -865.19229437, H (0K) = -864.870743,</b><br><b>H (298K) = -864.853817, G (298K) = -864.914410 au.</b><br>Imaginary frequency = 0. |            |            |            |
| C                                                                                                                                        | 2.0121280  | -0.8503680 | -0.3912180 | C                                                                                                                                        | -1.9937780 | 1.2954070  | 0.1414990  |
| C                                                                                                                                        | 1.9681720  | 0.0248000  | 0.7096820  | C                                                                                                                                        | -0.7298730 | 1.5630640  | 0.7088540  |
| N                                                                                                                                        | 0.8970890  | 0.1532640  | 1.6174650  | N                                                                                                                                        | -0.2184020 | 0.7643150  | 1.7507990  |
| C                                                                                                                                        | -0.3507280 | -0.5272820 | 1.7534090  | C                                                                                                                                        | -0.2519390 | -0.6898370 | 1.8129370  |
| C                                                                                                                                        | -1.0474410 | -1.4011040 | 0.7628820  | C                                                                                                                                        | -0.8094400 | -1.5544150 | 0.7232010  |
| C                                                                                                                                        | -0.5065590 | -1.8933270 | -0.4328160 | C                                                                                                                                        | -2.0506870 | -1.2321300 | 0.1417790  |
| C                                                                                                                                        | -2.3442550 | -1.7986100 | 1.1461200  | C                                                                                                                                        | -0.1534850 | -2.7337490 | 0.3530560  |
| C                                                                                                                                        | -3.1158830 | -2.6463950 | 0.3666130  | C                                                                                                                                        | -0.7110130 | -3.5924180 | -0.5944060 |
| C                                                                                                                                        | -2.5842590 | -3.1359460 | -0.8299450 | C                                                                                                                                        | -1.9351410 | -3.2708890 | -1.1806520 |
| C                                                                                                                                        | -1.3027550 | -2.7610720 | -1.2077600 | C                                                                                                                                        | -2.5949050 | -2.0970870 | -0.8129920 |
| C                                                                                                                                        | 3.2368610  | -0.9677300 | -1.0775550 | C                                                                                                                                        | -2.5087580 | 2.1895470  | -0.8006820 |
| C                                                                                                                                        | 4.3590110  | -0.2188670 | -0.7474310 | C                                                                                                                                        | -1.8055840 | 3.3309640  | -1.1891020 |
| C                                                                                                                                        | 4.2841090  | 0.6891870  | 0.3130280  | C                                                                                                                                        | -0.5566900 | 3.5865090  | -0.6219830 |
| C                                                                                                                                        | 3.1062080  | 0.7892960  | 1.0375410  | C                                                                                                                                        | -0.0239750 | 2.7123920  | 0.3223140  |

|                                                                                                                                                         |            |            |            |                                                                                                                                                         |            |            |            |
|---------------------------------------------------------------------------------------------------------------------------------------------------------|------------|------------|------------|---------------------------------------------------------------------------------------------------------------------------------------------------------|------------|------------|------------|
| C                                                                                                                                                       | -0.2810690 | 1.0023190  | 1.6397070  | C                                                                                                                                                       | 1.0683360  | 0.0515160  | 1.7289280  |
| C                                                                                                                                                       | -0.8729470 | 1.7542720  | 0.4880570  | H                                                                                                                                                       | -0.5076100 | -1.0487310 | 2.8143590  |
| C                                                                                                                                                       | -0.3203550 | 1.8152960  | -0.7977120 | H                                                                                                                                                       | 0.8033260  | -2.9744970 | 0.8087620  |
| C                                                                                                                                                       | -2.0587500 | 2.4653740  | 0.7380650  | H                                                                                                                                                       | -0.1899530 | -4.5037070 | -0.8748410 |
| C                                                                                                                                                       | -2.6886460 | 3.1920880  | -0.2690050 | H                                                                                                                                                       | -2.3771070 | -3.9306510 | -1.9226960 |
| C                                                                                                                                                       | -2.1351460 | 3.2352100  | -1.5509130 | H                                                                                                                                                       | -3.5500060 | -1.8483190 | -1.2701540 |
| C                                                                                                                                                       | -0.9487100 | 2.5492800  | -1.8066920 | H                                                                                                                                                       | -3.4826860 | 1.9810340  | -1.2387570 |
| H                                                                                                                                                       | -0.5060480 | -0.8924630 | 2.7730440  | H                                                                                                                                                       | -2.2284360 | 4.0092920  | -1.9246580 |
| H                                                                                                                                                       | -2.7416070 | -1.4230970 | 2.0868630  | H                                                                                                                                                       | 0.0069440  | 4.4696660  | -0.9112010 |
| H                                                                                                                                                       | -4.1147370 | -2.9289990 | 0.6874340  | H                                                                                                                                                       | 0.9431180  | 2.9113680  | 0.7739630  |
| H                                                                                                                                                       | -3.1612010 | -3.8107680 | -1.4565190 | C                                                                                                                                                       | -2.7647420 | 0.0484010  | 0.5391120  |
| H                                                                                                                                                       | -0.8894370 | -3.1499490 | -2.1364820 | H                                                                                                                                                       | -3.7546070 | 0.0726100  | 0.0720180  |
| H                                                                                                                                                       | 3.2882720  | -1.6547400 | -1.9203640 | H                                                                                                                                                       | -2.9341100 | 0.0521030  | 1.6256330  |
| H                                                                                                                                                       | 5.2800530  | -0.3395920 | -1.3108110 | C                                                                                                                                                       | 2.0135170  | -0.0007300 | 0.5724630  |
| H                                                                                                                                                       | 5.1464040  | 1.2892830  | 0.5907730  | C                                                                                                                                                       | 3.3858540  | -0.0262080 | 0.8713950  |
| H                                                                                                                                                       | 3.0384380  | 1.4427530  | 1.9022000  | C                                                                                                                                                       | 1.6287480  | -0.0236500 | -0.7785380 |
| H                                                                                                                                                       | -0.3999270 | 1.5388030  | 2.5838990  | C                                                                                                                                                       | 4.3458850  | -0.0874800 | -0.1373110 |
| H                                                                                                                                                       | 0.6149470  | 1.3130440  | -1.0122700 | H                                                                                                                                                       | 3.7032680  | 0.0012100  | 1.9115820  |
| H                                                                                                                                                       | -2.4913240 | 2.4424740  | 1.7361500  | C                                                                                                                                                       | 2.5901430  | -0.0786400 | -1.7877850 |
| H                                                                                                                                                       | -3.6087510 | 3.7286610  | -0.0523610 | H                                                                                                                                                       | 0.5807740  | 0.0025220  | -1.0494240 |
| H                                                                                                                                                       | -2.6206180 | 3.8049610  | -2.3386810 | C                                                                                                                                                       | 3.9499400  | -0.1130260 | -1.4750310 |
| H                                                                                                                                                       | -0.5000500 | 2.5878640  | -2.7960490 | H                                                                                                                                                       | 5.4008460  | -0.1100800 | 0.1230740  |
| C                                                                                                                                                       | 0.8454230  | -1.5697610 | -1.0536670 | H                                                                                                                                                       | 2.2698260  | -0.0939410 | -2.8261580 |
| H                                                                                                                                                       | 1.2425080  | -2.5161630 | -1.4417610 | H                                                                                                                                                       | 4.6934020  | -0.1561450 | -2.2664810 |
| H                                                                                                                                                       | 0.6170060  | -0.9848820 | -1.9596620 | H                                                                                                                                                       | 1.5973480  | 0.1508160  | 2.6770460  |
| Compound <b>28</b>                                                                                                                                      |            |            |            | TS of izomerization of compound <b>28</b>                                                                                                               |            |            |            |
| <b>E</b> = -326.79462920, <b>H (0K)</b> = -326.651148,<br><b>H (298K)</b> = -326.642696, <b>G (298K)</b> = -326.683402 au.<br>Imaginary frequency = 0.  |            |            |            | <b>E</b> = -326.74725441, <b>H (0K)</b> = -326.605684,<br><b>H (298K)</b> = -326.598008, <b>G (298K)</b> = -326.636238 au.<br>Imaginary frequency = 1.  |            |            |            |
| N                                                                                                                                                       | 1.2909220  | 0.0546260  | 0.0000330  | N                                                                                                                                                       | 1.1653850  | 0.1203930  | -0.0457300 |
| C                                                                                                                                                       | 2.6328380  | -0.0736180 | -0.0009180 | C                                                                                                                                                       | 2.6001600  | 0.0987160  | 0.4002790  |
| H                                                                                                                                                       | 3.0733550  | -1.0556220 | -0.0004210 | H                                                                                                                                                       | 3.1543170  | -0.2778920 | -0.4787180 |
| C                                                                                                                                                       | 0.6005020  | -1.2123400 | 0.0002470  | C                                                                                                                                                       | 0.5827520  | -1.0771740 | -0.5221940 |
| C                                                                                                                                                       | -0.7006640 | -1.5076050 | 0.0001780  | C                                                                                                                                                       | -0.6569280 | -1.5180580 | -0.2351810 |
| C                                                                                                                                                       | -1.8622980 | 0.7900380  | -0.0010490 | C                                                                                                                                                       | -1.8579960 | 0.6002620  | -0.0549000 |
| H                                                                                                                                                       | -2.8152640 | 1.3141990  | -0.0020970 | H                                                                                                                                                       | -2.8733050 | 0.8534680  | -0.3538360 |
| C                                                                                                                                                       | -0.7380360 | 1.5434510  | -0.0000500 | C                                                                                                                                                       | -0.8674350 | 1.4890640  | -0.2787480 |
| H                                                                                                                                                       | -0.9031490 | 2.6207870  | -0.0002950 | H                                                                                                                                                       | -1.1055750 | 2.4778590  | -0.6644340 |
| C                                                                                                                                                       | 0.6561910  | 1.2524300  | 0.0015230  | C                                                                                                                                                       | 0.5274290  | 1.2583160  | 0.0217070  |
| H                                                                                                                                                       | 1.3430910  | 2.0902500  | 0.0019630  | H                                                                                                                                                       | 1.1908330  | 2.0726630  | 0.3072150  |
| H                                                                                                                                                       | -0.8783750 | -2.5832660 | -0.0000030 | H                                                                                                                                                       | -0.9725510 | -2.4748840 | -0.6421580 |
| H                                                                                                                                                       | 1.3081400  | -2.0309760 | 0.0005410  | H                                                                                                                                                       | 1.2905380  | -1.6712150 | -1.0893250 |
| H                                                                                                                                                       | 3.2372360  | 0.8209900  | -0.0021230 | H                                                                                                                                                       | 2.6223950  | -0.7256790 | 1.1349090  |
| C                                                                                                                                                       | -1.9678040 | -0.7043070 | 0.0001610  | C                                                                                                                                                       | -1.6148350 | -0.7285800 | 0.6229700  |
| H                                                                                                                                                       | -2.5634590 | -1.0442130 | -0.8663960 | H                                                                                                                                                       | -2.5531570 | -1.2716600 | 0.7589590  |
| H                                                                                                                                                       | -2.5624080 | -1.0428260 | 0.8680500  | H                                                                                                                                                       | -1.1900770 | -0.5606900 | 1.6238990  |
| TS-1 of cycloaddition of ylide <b>21</b> to fumaronitrile                                                                                               |            |            |            | TS-2 of cycloaddition of ylide <b>21</b> to fumaronitrile                                                                                               |            |            |            |
| 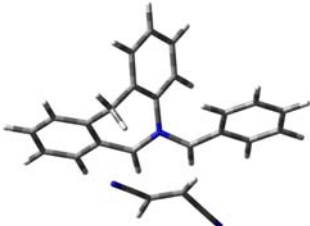                                                                     |            |            |            |                                                                    |            |            |            |
| <b>E</b> = -1128.24793120, <b>H (0K)</b> = -1127.875649,<br><b>H (298K)</b> = -1127.852104, <b>G (298K)</b> = -1127.928117 au. Imaginary frequency = 1. |            |            |            | <b>E</b> = -1128.25133291, <b>H (0K)</b> = -1127.879111,<br><b>H (298K)</b> = -1127.855563, <b>G (298K)</b> = -1127.931238 au. Imaginary frequency = 1. |            |            |            |
| C                                                                                                                                                       | -0.9959930 | 1.8582810  | 0.6138600  | C                                                                                                                                                       | -0.6198620 | 1.9137540  | 0.6001470  |

|                                                                                                                                |            |            |            |                                                                                                                                |            |            |            |
|--------------------------------------------------------------------------------------------------------------------------------|------------|------------|------------|--------------------------------------------------------------------------------------------------------------------------------|------------|------------|------------|
| C                                                                                                                              | -0.0781660 | 1.3739440  | -0.3276400 | C                                                                                                                              | 0.1260550  | 1.2957550  | -0.4105700 |
| N                                                                                                                              | 0.0710930  | -0.0473230 | -0.6135170 | N                                                                                                                              | 0.0543190  | -0.1393100 | -0.6413910 |
| C                                                                                                                              | -1.0202290 | -0.8286010 | -0.8835230 | C                                                                                                                              | -1.1607430 | -0.7444420 | -0.8541940 |
| C                                                                                                                              | -2.4151000 | -0.4805510 | -0.7182790 | C                                                                                                                              | -2.4678440 | -0.1887600 | -0.5734270 |
| C                                                                                                                              | -2.9016900 | 0.3174690  | 0.3487670  | C                                                                                                                              | -2.7355580 | 0.6588550  | 0.5338260  |
| C                                                                                                                              | -3.3446180 | -1.0643920 | -1.6069240 | C                                                                                                                              | -3.5514380 | -0.6232590 | -1.3679680 |
| C                                                                                                                              | -4.7085070 | -0.8408820 | -1.4713650 | C                                                                                                                              | -4.8509230 | -0.2095260 | -1.1017440 |
| C                                                                                                                              | -5.1786140 | -0.0297830 | -0.4351250 | C                                                                                                                              | -5.1029340 | 0.6484360  | -0.0283260 |
| C                                                                                                                              | -4.2740440 | 0.5408400  | 0.4611100  | C                                                                                                                              | -4.0451890 | 1.0730660  | 0.7774640  |
| C                                                                                                                              | -0.3461740 | -2.7661290 | 0.6697380  | C                                                                                                                              | 0.3008530  | 4.0575150  | -0.0977350 |
| C                                                                                                                              | -0.3024770 | 4.1288880  | 0.0593640  | C                                                                                                                              | -0.5138140 | 3.3029250  | 0.7424160  |
| C                                                                                                                              | 1.0256650  | -2.5351860 | 0.6447580  | C                                                                                                                              | 1.0090230  | 3.4286920  | -1.1236440 |
| C                                                                                                                              | 0.6870280  | 2.2592980  | -1.0979950 | C                                                                                                                              | 0.5417550  | -2.4575520 | 1.0882430  |
| C                                                                                                                              | 1.3235480  | -0.6019850 | -0.7762970 | C                                                                                                                              | 1.1886710  | -0.8992530 | -0.7433000 |
| C                                                                                                                              | 2.5900590  | -0.0404780 | -0.3283890 | C                                                                                                                              | 2.5721840  | -0.5025460 | -0.5293240 |
| C                                                                                                                              | 2.7475680  | 0.7400030  | 0.8389310  | C                                                                                                                              | 3.0093160  | 0.4318430  | 0.4360160  |
| C                                                                                                                              | 3.7530270  | -0.3978760 | -1.0445270 | C                                                                                                                              | 3.5555380  | -1.1864810 | -1.2795020 |
| C                                                                                                                              | 5.0125930  | 0.0244760  | -0.6276740 | C                                                                                                                              | 4.9106400  | -0.9323800 | -1.0954250 |
| C                                                                                                                              | 5.1483400  | 0.8142490  | 0.5151600  | C                                                                                                                              | 0.9178870  | 2.0495540  | -1.2833960 |
| C                                                                                                                              | 0.5798530  | 3.6315690  | -0.9015570 | C                                                                                                                              | 5.3246860  | 0.0088010  | -0.1499500 |
| H                                                                                                                              | -0.8003420 | -1.6504990 | -1.5541060 | H                                                                                                                              | -1.1207720 | -1.5807370 | -1.5417340 |
| H                                                                                                                              | -2.9775250 | -1.6922980 | -2.4154120 | H                                                                                                                              | -3.3569270 | -1.2948830 | -2.1999710 |
| H                                                                                                                              | -5.4037880 | -1.2951700 | -2.1715570 | H                                                                                                                              | -5.6663290 | -0.5547920 | -1.7310150 |
| H                                                                                                                              | -6.2438460 | 0.1475100  | -0.3175990 | H                                                                                                                              | -6.1158210 | 0.9764550  | 0.1871650  |
| H                                                                                                                              | -4.6405310 | 1.1549160  | 1.2799690  | H                                                                                                                              | -4.2407530 | 1.7268960  | 1.6241930  |
| H                                                                                                                              | -1.7952720 | 3.6266090  | 1.5247960  | H                                                                                                                              | -1.0880510 | 3.7912570  | 1.5253150  |
| H                                                                                                                              | -0.3884570 | 5.1990490  | 0.2247210  | H                                                                                                                              | 0.3723420  | 5.1328260  | 0.0383420  |
| H                                                                                                                              | 1.1805430  | 4.3074430  | -1.5027870 | H                                                                                                                              | 1.6290710  | 4.0075920  | -1.8015070 |
| H                                                                                                                              | 1.3650570  | 1.8663620  | -1.8464370 | H                                                                                                                              | 1.4623660  | 1.5511340  | -2.0773460 |
| H                                                                                                                              | 1.3767390  | -1.3269380 | -1.5798140 | H                                                                                                                              | 1.0416830  | -1.7900150 | -1.3446800 |
| H                                                                                                                              | 1.8800940  | 1.0088150  | 1.4327910  | H                                                                                                                              | 2.2913190  | 0.9416630  | 1.0657410  |
| H                                                                                                                              | 3.6600530  | -1.0231070 | -1.9282050 | H                                                                                                                              | 3.2426080  | -1.9212980 | -2.0180290 |
| H                                                                                                                              | 5.8900960  | -0.2662620 | -1.1987200 | H                                                                                                                              | 5.6438020  | -1.4687960 | -1.6917560 |
| H                                                                                                                              | 6.1302910  | 1.1460210  | 0.8403590  | H                                                                                                                              | 6.3821650  | 0.2094080  | -0.0026970 |
| H                                                                                                                              | 4.1031020  | 1.7640950  | 2.1466830  | H                                                                                                                              | 4.6788560  | 1.3970350  | 1.3688170  |
| C                                                                                                                              | -1.9238700 | 0.9160370  | 1.3370420  | C                                                                                                                              | -1.5933090 | 1.1050870  | 1.4227650  |
| H                                                                                                                              | -2.4656980 | 1.4512370  | 2.1221470  | H                                                                                                                              | -1.9726900 | 1.7064030  | 2.2540980  |
| H                                                                                                                              | -1.3620750 | 0.1162680  | 1.8294620  | H                                                                                                                              | -1.0802730 | 0.2396460  | 1.8628760  |
| C                                                                                                                              | -1.0871410 | 3.2451160  | 0.7938810  | C                                                                                                                              | -0.8167610 | -2.5807320 | 0.8308530  |
| C                                                                                                                              | 4.0083490  | 1.1637230  | 1.2457120  | H                                                                                                                              | -1.5498110 | -2.0911830 | 1.4609800  |
| C                                                                                                                              | -1.1463900 | -2.4357210 | 1.7939070  | C                                                                                                                              | 4.3669670  | 0.6800660  | 0.6144050  |
| N                                                                                                                              | -1.8151330 | -2.1873810 | 2.7179270  | H                                                                                                                              | 1.2552210  | -3.1615780 | 0.6749490  |
| C                                                                                                                              | 1.8679680  | -3.3138240 | -0.2009230 | C                                                                                                                              | 0.9928870  | -1.6485630 | 2.1664950  |
| N                                                                                                                              | 2.5495800  | -3.9221990 | -0.9254420 | N                                                                                                                              | 1.3459910  | -0.9615750 | 3.0411010  |
| H                                                                                                                              | -0.7846480 | -3.4764340 | -0.0241820 | C                                                                                                                              | -1.3053000 | -3.5877200 | -0.0462200 |
| H                                                                                                                              | 1.5115260  | -2.0302100 | 1.4730290  | N                                                                                                                              | -1.7038420 | -4.3813770 | -0.8027330 |
| TS-3 of cycloaddition of ylide <b>21</b> to fumaronitrile                                                                      |            |            |            | TS-4 of cycloaddition of ylide <b>21</b> to fumaronitrile                                                                      |            |            |            |
| 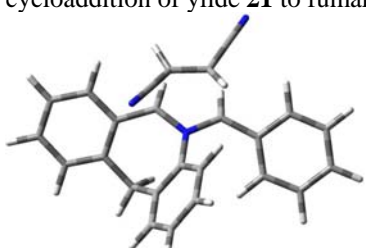                                            |            |            |            |                                            |            |            |            |
| E = -1128.24456972, H (0K) = -1127.872053,<br>H (298K) = -1127.848519, G (298K) = -1127.924501<br>au. Imaginary frequency = 1. |            |            |            | E = -1128.24362738, H (0K) = -1127.870878,<br>H (298K) = -1127.847436, G (298K) = -1127.923242<br>au. Imaginary frequency = 1. |            |            |            |
| C                                                                                                                              | 5.0732700  | 0.2682800  | -0.8154850 | C                                                                                                                              | -0.5548020 | 2.5497890  | 0.8849460  |
| C                                                                                                                              | 4.1404490  | -1.9529230 | -0.7571490 | C                                                                                                                              | 0.8425960  | 2.5665230  | 0.7697170  |
| H                                                                                                                              | 1.4729140  | 1.8290880  | 1.8390160  | C                                                                                                                              | -0.7564500 | -2.1758730 | 0.0046520  |

|                                                                                                                                |            |            |            |                                                                                                                                |            |            |            |
|--------------------------------------------------------------------------------------------------------------------------------|------------|------------|------------|--------------------------------------------------------------------------------------------------------------------------------|------------|------------|------------|
| C                                                                                                                              | -0.9568490 | -2.0444130 | -0.1303560 | C                                                                                                                              | 0.0334340  | -1.0680730 | 0.3457510  |
| C                                                                                                                              | -0.0676380 | -1.0494300 | 0.2926780  | N                                                                                                                              | 0.0074860  | 0.1106140  | -0.5141300 |
| N                                                                                                                              | 0.1178230  | 0.1336700  | -0.5372970 | C                                                                                                                              | -1.1693800 | 0.7918410  | -0.6955720 |
| C                                                                                                                              | -0.9581580 | 0.9815250  | -0.7195700 | C                                                                                                                              | -2.5247390 | 0.2335190  | -0.5464400 |
| C                                                                                                                              | -2.3674160 | 0.5717340  | -0.8032790 | C                                                                                                                              | -2.8291490 | -1.1255160 | -0.7979080 |
| C                                                                                                                              | -2.7953090 | -0.7346750 | -1.1391020 | C                                                                                                                              | -3.5875050 | 1.1192820  | -0.2814430 |
| C                                                                                                                              | -3.3437930 | 1.5759430  | -0.6528750 | C                                                                                                                              | -4.9017710 | 0.6679780  | -0.2132480 |
| C                                                                                                                              | -4.6988430 | 1.2988780  | -0.7907080 | C                                                                                                                              | -5.1900300 | -0.6813330 | -0.4228360 |
| C                                                                                                                              | -5.1151640 | 0.0008120  | -1.0905410 | C                                                                                                                              | -4.1527850 | -1.5641970 | -0.7187810 |
| C                                                                                                                              | -4.1612610 | -1.0003240 | -1.2643300 | C                                                                                                                              | -0.7008970 | -3.3103820 | 0.8208710  |
| C                                                                                                                              | -1.1205770 | -3.1746270 | 0.6775240  | C                                                                                                                              | 0.1169800  | -3.3480620 | 1.9483290  |
| C                                                                                                                              | -0.4238380 | -3.3095790 | 1.8765490  | C                                                                                                                              | 0.8852690  | -2.2325690 | 2.2800670  |
| C                                                                                                                              | 0.4437730  | -2.2988190 | 2.2919730  | C                                                                                                                              | 0.8477270  | -1.0919600 | 1.4804320  |
| C                                                                                                                              | 0.6237570  | -1.1680540 | 1.5003140  | C                                                                                                                              | 1.1651520  | 0.7713600  | -0.8283720 |
| C                                                                                                                              | 1.3570510  | 0.6551040  | -0.7361420 | C                                                                                                                              | 2.5158750  | 0.2002830  | -0.9138840 |
| C                                                                                                                              | 2.6513490  | -0.0258170 | -0.7113860 | C                                                                                                                              | 2.8084280  | -1.1726880 | -1.0342010 |
| C                                                                                                                              | 2.8531190  | -1.4222000 | -0.7127170 | C                                                                                                                              | 3.5916600  | 1.1096010  | -0.9744940 |
| C                                                                                                                              | 3.7915930  | 0.8065130  | -0.7822250 | C                                                                                                                              | 4.9023550  | 0.6693790  | -1.1268650 |
| C                                                                                                                              | -0.4790160 | 2.3629470  | 1.0702940  | C                                                                                                                              | 5.1770870  | -0.6958480 | -1.2293150 |
| C                                                                                                                              | 5.2573130  | -1.1165480 | -0.7984550 | C                                                                                                                              | 4.1225850  | -1.6091430 | -1.1884900 |
| C                                                                                                                              | 0.9214300  | 2.3913040  | 1.0947350  | H                                                                                                                              | -1.0839690 | 1.6035170  | -1.4079810 |
| H                                                                                                                              | -0.7022010 | 1.8324840  | -1.3421630 | H                                                                                                                              | -3.3791810 | 2.1731500  | -0.1331320 |
| H                                                                                                                              | -3.0305860 | 2.5892230  | -0.4175590 | H                                                                                                                              | -5.6993550 | 1.3730790  | 0.0028650  |
| H                                                                                                                              | -5.4276380 | 2.0932930  | -0.6580410 | H                                                                                                                              | -6.2136360 | -1.0414850 | -0.3701800 |
| H                                                                                                                              | -6.1716100 | -0.2286840 | -1.1960630 | H                                                                                                                              | -4.3712250 | -2.6125000 | -0.9085860 |
| H                                                                                                                              | -4.4778970 | -2.0091980 | -1.5183920 | H                                                                                                                              | -1.3153060 | -4.1693860 | 0.5638630  |
| H                                                                                                                              | -1.8113210 | -3.9509220 | 0.3588670  | H                                                                                                                              | 0.1482290  | -4.2404570 | 2.5670180  |
| H                                                                                                                              | -0.5651670 | -4.1953090 | 2.4891150  | H                                                                                                                              | 1.5201330  | -2.2398250 | 3.1607650  |
| H                                                                                                                              | 0.9787560  | -2.3839140 | 3.2327540  | H                                                                                                                              | 1.4617800  | -0.2411410 | 1.7405580  |
| H                                                                                                                              | 1.3065420  | -0.3886710 | 1.8126380  | H                                                                                                                              | 0.9883830  | 1.6052880  | -1.4957940 |
| H                                                                                                                              | 1.3422870  | 1.5700340  | -1.3130240 | H                                                                                                                              | 2.0085680  | -1.9034080 | -1.0298460 |
| H                                                                                                                              | 2.0078620  | -2.0989940 | -0.7036170 | H                                                                                                                              | 3.3927670  | 2.1746640  | -0.8907890 |
| H                                                                                                                              | 3.6607300  | 1.8850420  | -0.8038040 | H                                                                                                                              | 5.7107380  | 1.3944570  | -1.1604820 |
| H                                                                                                                              | 5.9309030  | 0.9338880  | -0.8601160 | H                                                                                                                              | 6.1998960  | -1.0428940 | -1.3452020 |
| H                                                                                                                              | 6.2579660  | -1.5383740 | -0.8291430 | H                                                                                                                              | 4.3198370  | -2.6734780 | -1.2849720 |
| H                                                                                                                              | 4.2680310  | -3.0321650 | -0.7662210 | C                                                                                                                              | -1.7147560 | -2.0856410 | -1.1560590 |
| C                                                                                                                              | -1.7737190 | -1.8278660 | -1.3799540 | H                                                                                                                              | -2.1242970 | -3.0736560 | -1.3855910 |
| H                                                                                                                              | -2.2775800 | -2.7556910 | -1.6663680 | H                                                                                                                              | -1.1924960 | -1.7336990 | -2.0568340 |
| H                                                                                                                              | -1.1166890 | -1.5459270 | -2.2150120 | H                                                                                                                              | 1.2917580  | 3.2999520  | 0.1066210  |
| C                                                                                                                              | 1.6336950  | 3.4145650  | 0.4172180  | C                                                                                                                              | 1.6914750  | 2.1297940  | 1.8242580  |
| N                                                                                                                              | 2.2228580  | 4.2326120  | -0.1726500 | N                                                                                                                              | 2.4015330  | 1.7863220  | 2.6840780  |
| C                                                                                                                              | -1.2092420 | 1.6999690  | 2.1052690  | C                                                                                                                              | -1.3059590 | 3.5655590  | 0.2283730  |
| N                                                                                                                              | -1.8118360 | 1.1753040  | 2.9530670  | N                                                                                                                              | -1.9100990 | 4.3896210  | -0.3353710 |
| H                                                                                                                              | -1.0030750 | 3.1899110  | 0.6016120  | H                                                                                                                              | -1.0294710 | 2.0601700  | 1.7287260  |
| TS-1 of cycloaddition of ylide <b>21</b> to malenitrile                                                                        |            |            |            | TS-2 of cycloaddition of ylide <b>21</b> to malenitrile                                                                        |            |            |            |
|                                                                                                                                |            |            |            |                                                                                                                                |            |            |            |
| E = -1128,24575572, H (0K) = -1127,873443,<br>H (298K) = -1127,850020, G (298K) = -1127,925113<br>au. Imaginary frequency = 1. |            |            |            | E = -1128,24035926, H (0K) = -1127,867760,<br>H (298K) = -1127,844329, G (298K) = -1127,919796<br>au. Imaginary frequency = 1. |            |            |            |
| C                                                                                                                              | -0.6678100 | 1.6205520  | 0.8594730  | C                                                                                                                              | -0.5596570 | 2.6841810  | 0.1399260  |
| C                                                                                                                              | 0.1479740  | 1.2764440  | -0.2254730 | C                                                                                                                              | 0.8306980  | 2.7936980  | -0.0043430 |
| N                                                                                                                              | 0.1187510  | -0.0545840 | -0.8129840 | C                                                                                                                              | -0.8746670 | -1.9611170 | 0.2958980  |
| C                                                                                                                              | -1.0670290 | -0.6026750 | -1.2303260 | C                                                                                                                              | -0.0241540 | -0.8516670 | 0.3899960  |
| C                                                                                                                              | -2.3973220 | -0.1365950 | -0.9101340 | N                                                                                                                              | 0.0452300  | 0.0749310  | -0.7348380 |

|                                                                                                                                |            |            |            |                                                                                                                                |            |            |            |
|--------------------------------------------------------------------------------------------------------------------------------|------------|------------|------------|--------------------------------------------------------------------------------------------------------------------------------|------------|------------|------------|
| C                                                                                                                              | -2.7473090 | 0.4154440  | 0.3496330  | C                                                                                                                              | -1.0828080 | 0.7915260  | -1.0767920 |
| C                                                                                                                              | -3.4178980 | -0.3542220 | -1.8616750 | C                                                                                                                              | -2.4722070 | 0.3302770  | -0.9189470 |
| C                                                                                                                              | -4.7349780 | -0.0042460 | -1.5976980 | C                                                                                                                              | -2.8452920 | -1.0335320 | -0.8709810 |
| C                                                                                                                              | -5.0671340 | 0.5681510  | -0.3664060 | C                                                                                                                              | -3.4912120 | 1.3012570  | -0.9421660 |
| C                                                                                                                              | -4.0744950 | 0.7725590  | 0.5912320  | C                                                                                                                              | -4.8345310 | 0.9466880  | -0.8842340 |
| C                                                                                                                              | -0.5936780 | 2.9308500  | 1.3494000  | C                                                                                                                              | -5.1941860 | -0.3993240 | -0.8072700 |
| C                                                                                                                              | 0.2542730  | 3.8742390  | 0.7756480  | C                                                                                                                              | -4.1983330 | -1.3746210 | -0.8037310 |
| C                                                                                                                              | 1.0302200  | 3.5244600  | -0.3311400 | C                                                                                                                              | -0.9216550 | -2.8541230 | 1.3709710  |
| C                                                                                                                              | 0.9728830  | 2.2288320  | -0.8345170 | C                                                                                                                              | -0.1474050 | -2.6469620 | 2.5111090  |
| C                                                                                                                              | 1.2783490  | -0.7545110 | -1.0483450 | C                                                                                                                              | 0.6784940  | -1.5259750 | 2.5934510  |
| C                                                                                                                              | 2.6418020  | -0.3895970 | -0.6820250 | C                                                                                                                              | 0.7448120  | -0.6244430 | 1.5334210  |
| C                                                                                                                              | 3.0119580  | 0.2458760  | 0.5236390  | C                                                                                                                              | 1.2399030  | 0.5597430  | -1.1650220 |
| C                                                                                                                              | 3.6728870  | -0.8027530 | -1.5543930 | C                                                                                                                              | 2.5623050  | -0.0502810 | -1.0243870 |
| C                                                                                                                              | 5.0114140  | -0.5713550 | -1.2522930 | C                                                                                                                              | 2.7991480  | -1.4172050 | -0.7726960 |
| C                                                                                                                              | 5.3588740  | 0.0758020  | -0.0646210 | C                                                                                                                              | 3.6781710  | 0.7813070  | -1.2525840 |
| C                                                                                                                              | 4.3525090  | 0.4754340  | 0.8184350  | C                                                                                                                              | 4.9739780  | 0.2775480  | -1.2114600 |
| H                                                                                                                              | -0.9669110 | -1.2500280 | -2.0935400 | C                                                                                                                              | 5.1924850  | -1.0761510 | -0.9483860 |
| H                                                                                                                              | -3.1577770 | -0.7968490 | -2.8205550 | C                                                                                                                              | 4.0983610  | -1.9172000 | -0.7366450 |
| H                                                                                                                              | -5.5016320 | -0.1743360 | -2.3483940 | H                                                                                                                              | -0.9174570 | 1.4133150  | -1.9506550 |
| H                                                                                                                              | -6.0957290 | 0.8412340  | -0.1485640 | H                                                                                                                              | -3.2233030 | 2.3523640  | -0.9968960 |
| H                                                                                                                              | -4.3359130 | 1.1971000  | 1.5572090  | H                                                                                                                              | -5.5969940 | 1.7202870  | -0.8910760 |
| H                                                                                                                              | -1.2214240 | 3.2055110  | 2.1929600  | H                                                                                                                              | -6.2400920 | -0.6882480 | -0.7563590 |
| H                                                                                                                              | 0.2986950  | 4.8814650  | 1.1800740  | H                                                                                                                              | -4.4725030 | -2.4261080 | -0.7611880 |
| H                                                                                                                              | 1.6763110  | 4.2565520  | -0.8063340 | H                                                                                                                              | -1.5821650 | -3.7151570 | 1.3087070  |
| H                                                                                                                              | 1.5683060  | 1.9492220  | -1.6960720 | H                                                                                                                              | -0.1977950 | -3.3521370 | 3.3358740  |
| H                                                                                                                              | 1.1933570  | -1.4168720 | -1.9039240 | H                                                                                                                              | 1.2726840  | -1.3417560 | 3.4830210  |
| H                                                                                                                              | 2.2549030  | 0.5363800  | 1.2410170  | H                                                                                                                              | 1.3933930  | 0.2391070  | 1.6030820  |
| H                                                                                                                              | 3.4118470  | -1.3054450 | -2.4833470 | H                                                                                                                              | 1.1402890  | 1.2549420  | -1.9879160 |
| H                                                                                                                              | 5.7829510  | -0.8946970 | -1.9459800 | H                                                                                                                              | 1.9682570  | -2.0969750 | -0.6268210 |
| H                                                                                                                              | 6.4026000  | 0.2580280  | 0.1754920  | H                                                                                                                              | 3.5201880  | 1.8382900  | -1.4485750 |
| H                                                                                                                              | 4.6125340  | 0.9595920  | 1.7556240  | H                                                                                                                              | 5.8143620  | 0.9453570  | -1.3788770 |
| C                                                                                                                              | -1.6730510 | 0.6314810  | 1.3942510  | H                                                                                                                              | 6.2034780  | -1.4720040 | -0.9131510 |
| H                                                                                                                              | -2.1176310 | 1.0076220  | 2.3199230  | H                                                                                                                              | 4.2541890  | -2.9759330 | -0.5475960 |
| H                                                                                                                              | -1.1863760 | -0.3190860 | 1.6395940  | C                                                                                                                              | -1.7786410 | -2.1096400 | -0.9030470 |
| C                                                                                                                              | -0.6459360 | -2.8889150 | -0.1187820 | H                                                                                                                              | -2.2445330 | -3.0995020 | -0.9035190 |
| C                                                                                                                              | 0.6964480  | -2.7085380 | 0.2083310  | H                                                                                                                              | -1.1945820 | -2.0275520 | -1.8308600 |
| H                                                                                                                              | 1.4595310  | -3.2119570 | -0.3747640 | H                                                                                                                              | 1.2039540  | 3.3461900  | -0.8613370 |
| C                                                                                                                              | 1.0958510  | -2.2762990 | 1.5055820  | C                                                                                                                              | 1.7650860  | 2.6211860  | 1.0483970  |
| N                                                                                                                              | 1.4255450  | -1.8925200 | 2.5559520  | N                                                                                                                              | 2.5632030  | 2.4873960  | 1.8902240  |
| C                                                                                                                              | -1.7171650 | -2.7778730 | 0.8041960  | H                                                                                                                              | -1.1747830 | 3.2737930  | -0.5319860 |
| N                                                                                                                              | -2.6195870 | -2.7009660 | 1.5403290  | C                                                                                                                              | -1.1772810 | 2.3862450  | 1.3946310  |
| H                                                                                                                              | -0.8804200 | -3.4222310 | -1.0354450 | N                                                                                                                              | -1.7077300 | 2.1552790  | 2.4053960  |
| TS-3 of cycloaddition of ylide <b>21</b> to malenitrile                                                                        |            |            |            | TS-4 of cycloaddition of ylide <b>21</b> to malenitrile                                                                        |            |            |            |
|                                                                                                                                |            |            |            |                                                                                                                                |            |            |            |
| E = -1128,24810447, H (0K) = -1127,875921,<br>H (298K) = -1127,852326, G (298K) = -1127,928573<br>au. Imaginary frequency = 1. |            |            |            | E = -1128,24370860, H (0K) = -1127,870898,<br>H (298K) = -1127,847447, G (298K) = -1127,923490<br>au. Imaginary frequency = 1. |            |            |            |
| C                                                                                                                              | 0.8383500  | -2.0476290 | 0.6475400  | C                                                                                                                              | -0.4597030 | 2.1807470  | 1.2392400  |
| C                                                                                                                              | 0.0171840  | -1.4661830 | -0.3266180 | C                                                                                                                              | 0.9425760  | 2.1718500  | 1.1517030  |
| N                                                                                                                              | -0.0509700 | -0.0258540 | -0.5131150 | H                                                                                                                              | 1.5080250  | 1.5523550  | 1.8372320  |
| C                                                                                                                              | 1.0955730  | 0.7107860  | -0.6853500 | C                                                                                                                              | -0.8728960 | -2.2390320 | 0.0448740  |
| C                                                                                                                              | 2.4574730  | 0.2726370  | -0.4623830 | C                                                                                                                              | -0.0238520 | -1.1898100 | 0.4203660  |
| C                                                                                                                              | 2.8312550  | -0.6011730 | 0.5917620  | N                                                                                                                              | 0.0655810  | -0.0095500 | -0.4291200 |
| C                                                                                                                              | 3.4754350  | 0.8550100  | -1.2484510 |                                                                                                                                |            |            |            |

|                                                                                                                                                            |            |            |            |                                                                                                                                                            |            |            |            |
|------------------------------------------------------------------------------------------------------------------------------------------------------------|------------|------------|------------|------------------------------------------------------------------------------------------------------------------------------------------------------------|------------|------------|------------|
| C                                                                                                                                                          | 4.8138820  | 0.5517600  | -1.0294820 | C                                                                                                                                                          | -1.0601720 | 0.7676020  | -0.5905870 |
| C                                                                                                                                                          | 5.1707080  | -0.3381710 | -0.0136370 | C                                                                                                                                                          | -2.4491280 | 0.2826370  | -0.6034590 |
| C                                                                                                                                                          | 4.1779890  | -0.9042820 | 0.7884080  | C                                                                                                                                                          | -2.8140000 | -1.0529020 | -0.9021020 |
| C                                                                                                                                                          | 0.8626340  | -3.4446120 | 0.7460660  | C                                                                                                                                                          | -3.4767100 | 1.2339940  | -0.4372650 |
| C                                                                                                                                                          | 0.1001570  | -4.2441920 | -0.1012040 | C                                                                                                                                                          | -4.8166650 | 0.8681020  | -0.5041170 |
| C                                                                                                                                                          | -0.6874210 | -3.6498640 | -1.0891690 | C                                                                                                                                                          | -5.1685950 | -0.4586370 | -0.7572540 |
| C                                                                                                                                                          | -0.7252320 | -2.2641750 | -1.2047550 | C                                                                                                                                                          | -4.1648780 | -1.4039990 | -0.9600790 |
| C                                                                                                                                                          | -1.2594170 | 0.6154520  | -0.6296290 | C                                                                                                                                                          | -0.9478710 | -3.3662180 | 0.8705140  |
| C                                                                                                                                                          | -2.5786210 | 0.0927690  | -0.3090430 | C                                                                                                                                                          | -0.1992110 | -3.4536240 | 2.0420450  |
| C                                                                                                                                                          | -2.8479170 | -0.8498250 | 0.7094560  | C                                                                                                                                                          | 0.6345820  | -2.3968040 | 2.4084450  |
| C                                                                                                                                                          | -3.6795540 | 0.6603130  | -0.9880700 | C                                                                                                                                                          | 0.7240930  | -1.2670210 | 1.5987840  |
| C                                                                                                                                                          | -4.9849280 | 0.2861390  | -0.6825290 | C                                                                                                                                                          | 1.2727470  | 0.6015520  | -0.6412070 |
| C                                                                                                                                                          | -5.2314170 | -0.6630250 | 0.3108350  | C                                                                                                                                                          | 2.5919740  | -0.0436540 | -0.6919660 |
| C                                                                                                                                                          | -4.1548570 | -1.2221450 | 1.0060150  | C                                                                                                                                                          | 2.8183560  | -1.4332160 | -0.7709480 |
| H                                                                                                                                                          | 0.9615810  | 1.5792460  | -1.3192890 | C                                                                                                                                                          | 3.7137450  | 0.8117110  | -0.7548190 |
| H                                                                                                                                                          | 3.1996210  | 1.5534850  | -2.0334040 | C                                                                                                                                                          | 5.0032470  | 0.2990630  | -0.8558500 |
| H                                                                                                                                                          | 5.5784460  | 1.0097890  | -1.6503030 | C                                                                                                                                                          | 5.2125450  | -1.0806470 | -0.9138840 |
| H                                                                                                                                                          | 6.2149030  | -0.5795070 | 0.1634170  | C                                                                                                                                                          | 4.1123230  | -1.9386110 | -0.8804170 |
| H                                                                                                                                                          | 4.4547140  | -1.5794990 | 1.5948430  | H                                                                                                                                                          | -0.8795130 | 1.6418340  | -1.2055440 |
| H                                                                                                                                                          | 1.4986940  | -3.9027400 | 1.4990870  | H                                                                                                                                                          | -3.2179600 | 2.2703310  | -0.2499570 |
| H                                                                                                                                                          | 0.1304170  | -5.3252820 | -0.0004100 | H                                                                                                                                                          | -5.5845730 | 1.6228800  | -0.3605620 |
| H                                                                                                                                                          | -1.2689560 | -4.2610320 | -1.7727720 | H                                                                                                                                                          | -6.2130950 | -0.7522210 | -0.8123370 |
| H                                                                                                                                                          | -1.3321510 | -1.7931600 | -1.9695060 | H                                                                                                                                                          | -4.4296150 | -2.4342000 | -1.1866510 |
| H                                                                                                                                                          | -1.2322660 | 1.4738940  | -1.2902950 | H                                                                                                                                                          | -1.6076800 | -4.1810480 | 0.5841300  |
| H                                                                                                                                                          | -2.0324970 | -1.2855890 | 1.2765940  | H                                                                                                                                                          | -0.2683140 | -4.3397200 | 2.6663870  |
| H                                                                                                                                                          | -3.5001950 | 1.4109230  | -1.7525220 | H                                                                                                                                                          | 1.2211230  | -2.4482970 | 3.3207920  |
| H                                                                                                                                                          | -5.8113190 | 0.7407400  | -1.2217800 | H                                                                                                                                                          | 1.3946630  | -0.4636930 | 1.8709740  |
| H                                                                                                                                                          | -6.2496150 | -0.9569260 | 0.5494570  | H                                                                                                                                                          | 1.1843360  | 1.4850530  | -1.2604420 |
| H                                                                                                                                                          | -4.3353480 | -1.9490650 | 1.7936080  | H                                                                                                                                                          | 1.9854770  | -2.1257370 | -0.7720320 |
| C                                                                                                                                                          | 1.7533640  | -1.1832240 | 1.4806560  | H                                                                                                                                                          | 3.5668140  | 1.8871230  | -0.7196920 |
| H                                                                                                                                                          | 2.1995200  | -1.7728960 | 2.2869590  | H                                                                                                                                                          | 5.8469050  | 0.9826740  | -0.8943000 |
| H                                                                                                                                                          | 1.1778450  | -0.3737930 | 1.9508960  | H                                                                                                                                                          | 6.2189490  | -1.4813070 | -0.9967830 |
| C                                                                                                                                                          | 0.5711240  | 2.3970230  | 1.0765290  | H                                                                                                                                                          | 4.2572640  | -3.0136200 | -0.9482120 |
| C                                                                                                                                                          | -0.8142880 | 2.2920400  | 1.1088790  | C                                                                                                                                                          | -1.7420430 | -2.0862270 | -1.1766710 |
| C                                                                                                                                                          | -1.6819110 | 3.2403670  | 0.4964730  | H                                                                                                                                                          | -2.1996640 | -3.0449250 | -1.4375460 |
| N                                                                                                                                                          | -2.4137470 | 3.9804530  | -0.0287610 | H                                                                                                                                                          | -1.1318170 | -1.7731110 | -2.0355790 |
| H                                                                                                                                                          | -1.2747010 | 1.6387140  | 1.8425670  | C                                                                                                                                                          | 1.6693770  | 3.2665860  | 0.5999490  |
| C                                                                                                                                                          | 1.2635490  | 3.4318900  | 0.3878670  | N                                                                                                                                                          | 2.2934710  | 4.1283430  | 0.1226820  |
| N                                                                                                                                                          | 1.8592970  | 4.2407200  | -0.2042740 | C                                                                                                                                                          | -1.2143360 | 3.3325770  | 0.8717230  |
| H                                                                                                                                                          | 1.1605600  | 1.8393580  | 1.7948920  | N                                                                                                                                                          | -1.8485620 | 4.2616670  | 0.5645110  |
|                                                                                                                                                            |            |            |            | H                                                                                                                                                          | -0.9377920 | 1.5162950  | 1.9515170  |
| TS-1 of cycloaddition of ylide <b>21</b> to dimethyl maleate                                                                                               |            |            |            | TS-2 of cycloaddition of ylide <b>21</b> to dimethyl maleate                                                                                               |            |            |            |
|                                                                         |            |            |            |                                                                        |            |            |            |
| <b>E</b> = -1399,51099964, <b>H (0K)</b> = -1399,049440,<br><b>H (298K)</b> = -1399,020658, <b>G (298K)</b> = -1399,107735<br>au. Imaginary frequency = 1. |            |            |            | <b>E</b> = -1399,50368831, <b>H (0K)</b> = -1399,041894,<br><b>H (298K)</b> = -1399,013025, <b>G (298K)</b> = -1399,101258<br>au. Imaginary frequency = 1. |            |            |            |
| C                                                                                                                                                          | -0.4140780 | 1.9571200  | 1.0783350  | C                                                                                                                                                          | -1.1023280 | 0.0589370  | -1.3290860 |
| C                                                                                                                                                          | 0.3143840  | 1.7794010  | -0.1045940 | C                                                                                                                                                          | 3.6292660  | -0.3246280 | -1.5272750 |
| N                                                                                                                                                          | 0.1653050  | 0.5895400  | -0.9280470 | C                                                                                                                                                          | -1.0431760 | -2.3627050 | 0.6076260  |
| C                                                                                                                                                          | -1.0774420 | 0.2020360  | -1.3627430 | C                                                                                                                                                          | -0.1917520 | -1.2531250 | 0.5253620  |
| C                                                                                                                                                          | -2.3528790 | 0.6775730  | -0.8674230 | N                                                                                                                                                          | -0.0301050 | -0.6101790 | -0.7725840 |
| C                                                                                                                                                          | -2.5922940 | 0.9993840  | 0.4947610  | C                                                                                                                                                          | -0.4950350 | 2.1662630  | -0.7232950 |
| C                                                                                                                                                          | -3.4381360 | 0.7074170  | -1.7698610 | C                                                                                                                                                          | -2.5154620 | -0.3320810 | -1.1333610 |
| C                                                                                                                                                          | -4.7122760 | 1.0766090  | -1.3572260 | C                                                                                                                                                          | -2.9220290 | -1.6547040 | -0.8310890 |
|                                                                                                                                                            |            |            |            | C                                                                                                                                                          | -3.5096750 | 0.6269680  | -1.4024400 |

|   |            |            |            |   |            |            |            |
|---|------------|------------|------------|---|------------|------------|------------|
| C | -4.9357550 | 1.4211520  | -0.0215290 | C | -4.8629950 | 0.3068730  | -1.3406080 |
| C | -3.8762910 | 1.3812250  | 0.8871290  | C | -5.2576420 | -0.9900350 | -1.0120190 |
| C | -0.2249030 | 3.1465660  | 1.7943530  | C | -4.2846330 | -1.9566360 | -0.7618850 |
| C | 0.6482990  | 4.1349920  | 1.3484090  | C | -1.1601960 | -3.0207650 | 1.8357090  |
| C | 1.3331580  | 3.9593880  | 0.1444640  | C | -0.4532640 | -2.5775300 | 2.9528060  |
| C | 1.1609860  | 2.7863770  | -0.5833060 | C | 0.3577870  | -1.4463430 | 2.8570880  |
| C | 1.2609060  | -0.1035520 | -1.3834770 | C | 0.4903460  | -0.7734160 | 1.6436490  |
| C | 2.6604740  | 0.1106350  | -1.0331580 | C | 1.2012640  | -0.3143680 | -1.2694370 |
| C | 3.1252680  | 0.4913760  | 0.2460870  | C | 2.4905260  | -0.9348650 | -0.9549060 |
| C | 3.6253860  | -0.1770560 | -2.0231100 | C | 2.6855150  | -2.1265700 | -0.2254200 |
| C | 4.9881850  | -0.0684920 | -1.7611220 | C | 0.8994910  | 2.1430470  | -0.8559850 |
| C | 5.4300980  | 0.3301100  | -0.4982260 | C | 4.9012030  | -0.8607910 | -1.3564660 |
| C | 4.4894530  | 0.6030360  | 0.4994380  | C | 5.0780910  | -2.0331250 | -0.6180090 |
| H | -1.0751070 | -0.2441420 | -2.3496450 | C | 3.9619660  | -2.6613780 | -0.0637710 |
| H | -3.2643240 | 0.4375440  | -2.8087380 | H | -0.8857090 | 0.3960130  | -2.3378960 |
| H | -5.5284480 | 1.0987550  | -2.0742270 | H | -3.2153670 | 1.6435230  | -1.6390760 |
| H | -5.9279820 | 1.7119010  | 0.3126060  | H | -5.6064890 | 1.0725500  | -1.5448870 |
| H | -4.0507650 | 1.6344220  | 1.9302300  | H | -6.3112210 | -1.2498050 | -0.9569030 |
| H | -0.7848500 | 3.2908820  | 2.7147420  | H | -4.5839640 | -2.9740780 | -0.5207740 |
| H | 0.7815430  | 5.0443420  | 1.9279070  | H | -1.8198400 | -3.8816620 | 1.9115980  |
| H | 1.9966210  | 4.7324270  | -0.2320570 | H | -0.5524990 | -3.1023770 | 3.8991840  |
| H | 1.6857170  | 2.6421890  | -1.5208590 | H | 0.8831480  | -1.0707050 | 3.7299390  |
| H | 1.0931760  | -0.5607700 | -2.3525120 | H | 1.0905820  | 0.1257330  | 1.5793040  |
| H | 2.4171590  | 0.6742630  | 1.0445590  | H | 1.1536270  | 0.1189550  | -2.2590200 |
| H | 3.2930140  | -0.4844980 | -3.0123240 | H | 1.8415290  | -2.6541420 | 0.1988150  |
| H | 5.7053640  | -0.2915050 | -2.5467960 | H | 3.5075020  | 0.5944610  | -2.0918390 |
| H | 6.4927650  | 0.4207670  | -0.2909580 | H | 5.7567390  | -0.3623050 | -1.8046850 |
| H | 4.8212190  | 0.9024260  | 1.4904500  | H | 6.0702390  | -2.4552040 | -0.4841220 |
| C | -1.4498940 | 0.9411270  | 1.4865360  | H | 4.0800810  | -3.5845550 | 0.4975890  |
| H | -1.8164590 | 1.1631630  | 2.4933270  | C | -1.8855460 | -2.7357730 | -0.5875690 |
| H | -1.0118140 | -0.0630790 | 1.5127080  | H | -2.3807210 | -3.6965820 | -0.4172250 |
| C | -0.7438590 | -2.2662740 | -0.8738960 | H | -1.2523150 | -2.8522250 | -1.4784250 |
| C | 0.6075950  | -2.2694890 | -0.5775800 | H | 1.2719140  | 2.3981490  | -1.8433490 |
| H | 1.2761140  | -2.6973080 | -1.3174260 | H | -1.0219190 | 2.5872510  | -1.5735840 |
| H | -1.0095110 | -2.5388090 | -1.8912040 | C | -1.2580130 | 2.3305230  | 0.5406460  |
| C | 1.2186060  | -2.1583350 | 0.7660120  | O | -1.0410320 | 1.8444660  | 1.6282750  |
| O | 0.8944690  | -1.4198740 | 1.6767990  | O | -2.3377490 | 3.1373050  | 0.3024780  |
| O | 2.2889430  | -2.9917570 | 0.8458520  | C | 1.9323540  | 2.2806760  | 0.1752060  |
| C | -1.8856940 | -2.3530270 | 0.0491360  | O | 1.8579100  | 2.1164130  | 1.3805710  |
| O | -1.8931780 | -2.2856330 | 1.2641800  | O | 3.1068420  | 2.6624730  | -0.4243120 |
| O | -3.0245220 | -2.5678700 | -0.6762880 | C | -3.1939240 | 3.3431580  | 1.4339540  |
| C | -4.2243700 | -2.6733200 | 0.0982650  | H | -2.6415460 | 3.8037330  | 2.2575250  |
| H | -5.0198740 | -2.8774740 | -0.6202530 | H | -3.9860980 | 4.0079440  | 1.0859690  |
| H | -4.1473260 | -3.4874100 | 0.8247950  | H | -3.6133580 | 2.3935040  | 1.7777600  |
| H | -4.4239290 | -1.7392990 | 0.6303120  | C | 4.2146400  | 2.8233230  | 0.4684040  |
| C | 3.0051300  | -2.9543650 | 2.0877360  | H | 4.4608230  | 1.8765390  | 0.9571940  |
| H | 3.7749570  | -3.7227640 | 2.0038680  | H | 5.0469710  | 3.1564980  | -0.1540400 |
| H | 3.4628980  | -1.9727390 | 2.2371910  | H | 3.9901760  | 3.5692130  | 1.2359610  |
| H | 2.3366640  | -3.1686610 | 2.9258320  |   |            |            |            |

TS-3 of cycloaddition of ylide **21** to dimethyl maleate

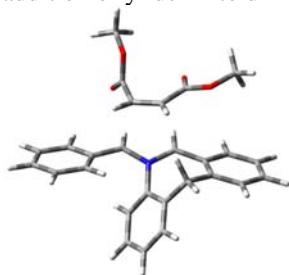

**E** = -1399,51011569, **H (0K)** = -1399,049047,  
**H (298K)** = -1399,020009, **G (298K)** = -1399,109320

TS-4 of cycloaddition of ylide **21** to dimethyl maleate

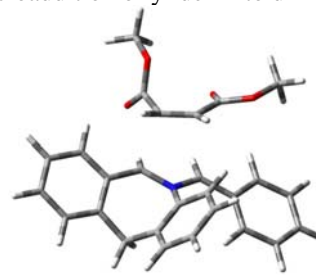

**E** = -1399,50544492, **H (0K)** = -1399,043621,  
**H (298K)** = -1399,014801, **G (298K)** = -1399,103037

| au. Imaginary frequency = 1. |            |            |            | au. Imaginary frequency = 1. |            |            |            |
|------------------------------|------------|------------|------------|------------------------------|------------|------------|------------|
| C                            | 0.5352650  | -2.7827310 | 0.6624190  | C                            | -0.3210280 | 1.8964720  | 0.7577790  |
| C                            | -0.2876230 | -2.1544540 | -0.2828720 | C                            | 3.3340940  | -0.7876380 | -1.2630610 |
| N                            | -0.2275210 | -0.7244950 | -0.5315670 | H                            | 0.9150040  | 0.7358290  | 2.0554520  |
| C                            | 0.9679980  | -0.1049530 | -0.7528650 | C                            | -1.7707780 | -2.5458910 | 0.1918940  |
| C                            | 2.2941970  | -0.6657390 | -0.6202420 | C                            | -0.6509050 | -1.7409630 | 0.4377120  |
| C                            | 2.6580980  | -1.5615890 | 0.4173680  | N                            | -0.3209140 | -0.6650370 | -0.4833260 |
| C                            | 3.3042150  | -0.1987400 | -1.4906430 | C                            | -1.2142120 | 0.3782180  | -0.6817730 |
| C                            | 4.6169720  | -0.6392450 | -1.3699770 | C                            | -2.6790630 | 0.2742670  | -0.5402640 |
| C                            | 4.9582270  | -1.5528240 | -0.3685960 | C                            | -3.4082680 | -0.9308180 | -0.6891650 |
| C                            | 3.9770960  | -2.0024460 | 0.5170140  | C                            | -3.4126340 | 1.4676490  | -0.3757070 |
| C                            | 0.4223250  | -4.1699250 | 0.8235310  | C                            | -4.8016660 | 1.4660010  | -0.2984910 |
| C                            | -0.4734750 | -4.9194970 | 0.0664330  | C                            | -5.5068260 | 0.2658020  | -0.3928530 |
| C                            | -1.2600380 | -4.2850630 | -0.8967310 | C                            | -4.8022630 | -0.9193810 | -0.5951870 |
| C                            | -1.1631150 | -2.9090430 | -1.0734450 | C                            | -2.0600110 | -3.5799650 | 1.0890670  |
| C                            | -1.3809340 | 0.0221580  | -0.6750860 | C                            | -1.2582390 | -3.8129920 | 2.2044710  |
| C                            | -2.7169800 | -0.3708120 | -0.2466180 | C                            | -0.1498000 | -2.9984860 | 2.4405130  |
| C                            | -2.9956550 | -1.1705570 | 0.8847800  | C                            | 0.1556860  | -1.9650110 | 1.5585810  |
| C                            | -3.8156800 | 0.1838810  | -0.9407440 | C                            | 0.9807050  | -0.4163970 | -0.7842550 |
| C                            | -5.1245310 | -0.0733730 | -0.5430640 | C                            | 2.0805020  | -1.3573990 | -0.9352670 |
| C                            | -5.3816910 | -0.8885550 | 0.5618860  | C                            | 2.0022510  | -2.7666080 | -0.8673400 |
| C                            | -4.3071840 | -1.4288460 | 1.2733740  | C                            | 0.8945050  | 1.3903210  | 1.1929700  |
| H                            | 0.8788370  | 0.8204090  | -1.3093610 | C                            | 4.4560540  | -1.5800910 | -1.4748650 |
| H                            | 3.0371530  | 0.5087890  | -2.2712820 | C                            | 4.3647670  | -2.9714370 | -1.3820080 |
| H                            | 5.3735930  | -0.2761640 | -2.0603160 | C                            | 3.1298160  | -3.5533210 | -1.0880410 |
| H                            | 5.9820490  | -1.9023250 | -0.2691250 | H                            | -0.8910030 | 1.0692260  | -1.4510320 |
| H                            | 4.2437900  | -2.6931450 | 1.3138070  | H                            | -2.8806470 | 2.4105770  | -0.3337450 |
| H                            | 1.0583100  | -4.6608950 | 1.5559060  | H                            | -5.3318530 | 2.4052430  | -0.1656290 |
| H                            | -0.5475690 | -5.9928230 | 0.2169220  | H                            | -6.5912880 | 0.2533680  | -0.3283270 |
| H                            | -1.9459970 | -4.8576870 | -1.5138710 | H                            | -5.3422650 | -1.8574250 | -0.7039660 |
| H                            | -1.7673070 | -2.4088230 | -1.8211150 | H                            | -2.9295370 | -4.2053590 | 0.9034720  |
| H                            | -1.3223590 | 0.7956250  | -1.4290950 | H                            | -1.4981010 | -4.6244150 | 2.8859150  |
| H                            | -2.1801070 | -1.5892300 | 1.4654800  | H                            | 0.4823470  | -3.1659670 | 3.3075620  |
| H                            | -3.6247870 | 0.8345880  | -1.7889890 | H                            | 1.0302020  | -1.3486070 | 1.7190690  |
| H                            | -5.9483350 | 0.3651650  | -1.1005570 | H                            | 1.1236290  | 0.5348600  | -1.2804280 |
| H                            | -6.4032930 | -1.0918410 | 0.8708790  | H                            | 1.0572940  | -3.2545350 | -0.6641350 |
| H                            | -4.4907580 | -2.0507730 | 2.1460340  | H                            | 3.4082500  | 0.2922960  | -1.3577190 |
| C                            | 1.5942170  | -1.9978710 | 1.3990680  | H                            | 5.4044680  | -1.1104790 | -1.7226940 |
| H                            | 2.0313410  | -2.6108450 | 2.1930900  | H                            | 5.2393610  | -3.5934090 | -1.5509160 |
| H                            | 1.1507950  | -1.1118770 | 1.8728880  | H                            | 3.0377910  | -4.6352470 | -1.0368420 |
| C                            | 0.4668500  | 1.6934530  | 1.1063670  | C                            | -2.6731520 | -2.2239160 | -0.9704040 |
| C                            | -0.8571750 | 1.8504390  | 0.7692510  | H                            | -3.3864350 | -3.0376320 | -1.1327000 |
| H                            | -1.6181270 | 1.4534020  | 1.4338870  | H                            | -2.0796330 | -2.1216840 | -1.8897420 |
| H                            | 0.7399120  | 1.0781810  | 1.9559210  | H                            | -1.1810970 | 1.7799380  | 1.4112790  |
| C                            | 1.5389840  | 2.4884820  | 0.5092370  | C                            | -0.3482580 | 3.1556600  | -0.0820980 |
| O                            | 1.4524610  | 3.1656560  | -0.5069460 | O                            | -0.6839540 | 3.2509980  | -1.2467430 |
| O                            | 2.6895910  | 2.3809450  | 1.2244720  | O                            | -0.0041480 | 4.2194630  | 0.6697660  |
| C                            | -1.3255380 | 2.9925970  | -0.1024500 | C                            | 2.1842270  | 1.8838920  | 0.7309240  |
| O                            | -1.7885640 | 2.9197240  | -1.2233240 | O                            | 2.3882790  | 2.6040720  | -0.2401100 |
| O                            | -1.2302210 | 4.1538730  | 0.5759070  | O                            | 3.1923150  | 1.4407650  | 1.5356330  |
| C                            | 3.8052430  | 3.1118520  | 0.7017810  | C                            | 0.0884620  | 5.4662090  | -0.0402940 |
| H                            | 4.6236880  | 2.9367770  | 1.4015750  | H                            | -0.8662710 | 5.7183410  | -0.5094430 |
| H                            | 4.0735940  | 2.7483560  | -0.2938730 | H                            | 0.3559460  | 6.2094020  | 0.7117060  |
| H                            | 3.5755850  | 4.1793480  | 0.6401200  | H                            | 0.8628620  | 5.3983810  | -0.8083950 |
| C                            | -1.5958120 | 5.3280860  | -0.1677780 | C                            | 4.4982020  | 1.9299140  | 1.2137730  |
| H                            | -2.6310320 | 5.2622540  | -0.5130860 | H                            | 5.1573110  | 1.5366460  | 1.9893840  |
| H                            | -1.4739110 | 6.1609380  | 0.5257340  | H                            | 4.8218870  | 1.5754760  | 0.2311750  |
| H                            | -0.9340870 | 5.4443630  | -1.0298560 | H                            | 4.5152240  | 3.0235170  | 1.2159530  |

TS-1 of cycloaddition of ylide **21** to N-phenylmaleimide

TS-2 of cycloaddition of ylide **21** to N-phenylmaleimide



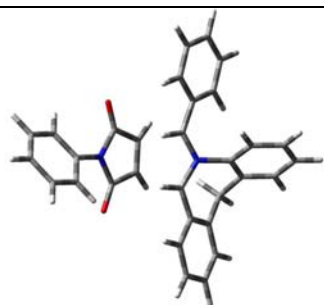

**E** = -1455.65688750, **H (0K)** = -1455.185872,  
**H (298K)** = -1455.157692, **G (298K)** = -1455.245210  
 au. Imaginary frequency = 1.

|   |            |            |            |
|---|------------|------------|------------|
| C | 3.4915630  | -0.4387750 | -0.3133800 |
| C | 2.6216520  | 0.2529230  | 0.5382600  |
| N | 1.1775720  | 0.1248850  | 0.4262160  |
| C | 0.5918380  | -1.1182760 | 0.4401420  |
| C | 1.2463790  | -2.3973110 | 0.2827160  |
| C | 2.3549850  | -2.6045530 | -0.5802800 |
| C | 0.6671120  | -3.5206000 | 0.9128110  |
| C | 1.1922320  | -4.7946930 | 0.7369930  |
| C | 2.3087100  | -4.9833190 | -0.0812390 |
| C | 2.8773300  | -3.8879470 | -0.7338890 |
| C | 4.8701440  | -0.2754250 | -0.1270660 |
| C | 5.3730540  | 0.5446130  | 0.8795270  |
| C | 4.4919470  | 1.2001920  | 1.7419670  |
| C | 3.1190730  | 1.0511760  | 1.5745290  |
| C | 0.3745520  | 1.2349740  | 0.4248590  |
| C | 0.7537400  | 2.6202840  | 0.2162430  |
| C | 1.8633970  | 3.0563860  | -0.5449970 |
| C | -0.1221410 | 3.6069010  | 0.7235280  |
| C | 0.1139200  | 4.9607450  | 0.5074560  |
| C | 1.2277490  | 5.3740510  | -0.2255400 |
| C | 2.0936120  | 4.4117970  | -0.7540830 |
| H | -0.3956310 | -1.1253440 | 0.8858970  |
| H | -0.2058190 | -3.3776060 | 1.5433240  |
| H | 0.7303290  | -5.6413160 | 1.2368830  |
| H | 2.7245750  | -5.9767090 | -0.2234140 |
| H | 3.7308270  | -4.0344990 | -1.3919440 |
| H | 5.5514220  | -0.8103580 | -0.7837560 |
| H | 6.4463700  | 0.6612300  | 0.9993060  |
| H | 4.8694640  | 1.8244520  | 2.5462540  |
| H | 2.4261130  | 1.5557570  | 2.2381630  |
| H | -0.5981810 | 1.0653350  | 0.8706860  |
| H | 2.5408640  | 2.3323490  | -0.9834760 |
| H | -1.0022510 | 3.2973390  | 1.2792910  |
| H | -0.5783600 | 5.6947110  | 0.9107000  |
| H | 1.4138550  | 6.4309710  | -0.3942670 |
| H | 2.9535260  | 4.7198210  | -1.3432900 |
| C | 2.9400360  | -1.4201940 | -1.3185100 |
| H | 3.7301600  | -1.7465700 | -2.0013460 |
| H | 2.1615770  | -0.9374880 | -1.9251880 |
| C | -1.9738930 | -1.3205220 | -1.0645420 |
| O | -2.2672820 | -2.4874080 | -0.8758370 |
| C | -2.1367110 | 1.0003650  | -1.1195690 |
| O | -2.5951350 | 2.1218530  | -0.9900760 |
| C | -0.7480600 | -0.7678590 | -1.6845960 |
| C | -0.8398500 | 0.5987910  | -1.7081720 |
| H | -0.2275540 | 1.3126650  | -2.2404050 |
| H | -0.0634640 | -1.4143610 | -2.2136960 |
| N | -2.7663390 | -0.2006000 | -0.6871590 |
| C | -4.0349440 | -0.2771210 | -0.0444850 |

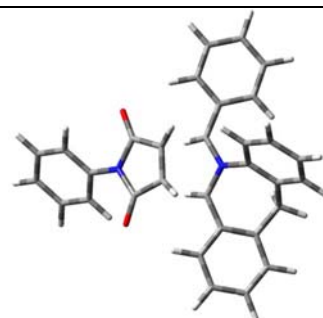

**E** = -1455.65699289, **H (0K)** = -1455.185277,  
**H (298K)** = -1455.157308, **G (298K)** = -1455.243805  
 au. Imaginary frequency = 1.

|   |            |            |            |
|---|------------|------------|------------|
| C | -2.0586150 | -1.0946990 | 1.1425730  |
| O | -2.4347640 | -2.2551680 | 1.1405790  |
| C | -2.1561330 | 1.2148990  | 0.9544230  |
| O | -2.6081910 | 2.3313310  | 0.7576470  |
| C | -0.7605720 | -0.5371230 | 1.5825460  |
| C | -0.8216400 | 0.8402820  | 1.4800670  |
| H | -0.2369300 | 1.5760790  | 2.0124260  |
| H | -0.0822190 | -1.1301600 | 2.1796340  |
| C | 3.5747290  | -0.6450370 | -0.2283640 |
| C | 2.5165880  | 0.1149220  | 0.2875550  |
| N | 1.2236630  | 0.0865370  | -0.3834200 |
| C | 0.5467530  | -1.1042270 | -0.4503140 |
| C | 1.1464530  | -2.4441740 | -0.4500420 |
| C | 2.4498090  | -2.7128720 | -0.9346890 |
| C | 0.3358490  | -3.5302780 | -0.0609290 |
| C | 0.8128470  | -4.8359580 | -0.1167780 |
| C | 2.1070750  | -5.0926420 | -0.5729080 |
| C | 2.9131440  | -4.0295220 | -0.9775830 |
| C | 4.8119040  | -0.5913660 | 0.4230570  |
| C | 4.9957670  | 0.1939680  | 1.5590150  |
| C | 3.9274240  | 0.9323230  | 2.0691130  |
| C | 2.6887610  | 0.8949800  | 1.4335190  |
| C | 0.5107380  | 1.2439600  | -0.5396920 |
| C | 1.0693200  | 2.5964660  | -0.6773460 |
| C | 2.3930970  | 2.8756350  | -1.0743320 |
| C | 0.1918460  | 3.6844970  | -0.4826030 |
| C | 0.6306480  | 4.9943960  | -0.6557100 |
| C | 1.9487890  | 5.2570030  | -1.0354980 |
| C | 2.8226400  | 4.1895300  | -1.2483740 |
| H | -0.4132550 | -1.0182970 | -0.9453420 |
| H | -0.6663510 | -3.3387140 | 0.3106710  |
| H | 0.1711780  | -5.6532140 | 0.2007580  |
| H | 2.4842930  | -6.1104840 | -0.6201630 |
| H | 3.9175730  | -4.2214360 | -1.3482120 |
| H | 5.6361670  | -1.1803770 | 0.0292330  |
| H | 5.9661350  | 0.2253550  | 2.0462150  |
| H | 4.0538690  | 1.5419070  | 2.9587830  |
| H | 1.8658380  | 1.4840460  | 1.8145720  |
| H | -0.4421540 | 1.0853660  | -1.0281270 |
| H | 3.0869600  | 2.0660280  | -1.2695920 |
| H | -0.8326010 | 3.4943830  | -0.1748370 |
| H | -0.0637530 | 5.8140480  | -0.4910940 |
| H | 2.2888180  | 6.2799500  | -1.1719250 |
| H | 3.8464180  | 4.3767430  | -1.5620110 |
| C | 3.3274090  | -1.5678870 | -1.3953380 |
| H | 4.2760500  | -1.9491470 | -1.7846690 |
| H | 2.8351450  | -1.0217250 | -2.2124040 |
| N | -2.8442310 | 0.0041010  | 0.6995500  |
| C | -4.1581570 | -0.1001670 | 0.1573680  |

|                                                                                                                                                            |            |            |            |                                                                                                                                                            |            |            |            |
|------------------------------------------------------------------------------------------------------------------------------------------------------------|------------|------------|------------|------------------------------------------------------------------------------------------------------------------------------------------------------------|------------|------------|------------|
| C                                                                                                                                                          | -5.0567310 | 0.6190120  | -0.3871790 | C                                                                                                                                                          | -5.1412940 | 0.8361020  | 0.5024700  |
| C                                                                                                                                                          | -4.2654410 | -1.2518320 | 0.9362110  | C                                                                                                                                                          | -4.4675370 | -1.1433210 | -0.7252650 |
| C                                                                                                                                                          | -6.2904650 | 0.5414480  | 0.2578410  | C                                                                                                                                                          | -6.4195150 | 0.7291520  | -0.0444400 |
| H                                                                                                                                                          | -4.8774960 | 1.3768330  | -1.1383810 | H                                                                                                                                                          | -4.8991970 | 1.6460810  | 1.1780790  |
| C                                                                                                                                                          | -5.5091500 | -1.3275880 | 1.5612330  | C                                                                                                                                                          | -5.7538090 | -1.2474920 | -1.2518240 |
| H                                                                                                                                                          | -3.4839080 | -1.9572520 | 1.1884180  | H                                                                                                                                                          | -3.7117050 | -1.8754790 | -0.9810620 |
| C                                                                                                                                                          | -6.5258340 | -0.4306880 | 1.2308360  | C                                                                                                                                                          | -6.7341160 | -0.3115220 | -0.9191020 |
| H                                                                                                                                                          | -7.0737770 | 1.2451810  | -0.0111450 | H                                                                                                                                                          | -7.1740990 | 1.4637970  | 0.2236700  |
| H                                                                                                                                                          | -5.6790150 | -2.0924150 | 2.3145400  | H                                                                                                                                                          | -5.9858840 | -2.0642290 | -1.9301040 |
| H                                                                                                                                                          | -7.4917400 | -0.4900170 | 1.7250060  | H                                                                                                                                                          | -7.7339010 | -0.3932480 | -1.3366750 |
| TS-3 of cycloaddition of ylide <b>21</b> to N-phenylmaleimide                                                                                              |            |            |            | TS-4 of cycloaddition of ylide <b>21</b> to N-phenylmaleimide                                                                                              |            |            |            |
| 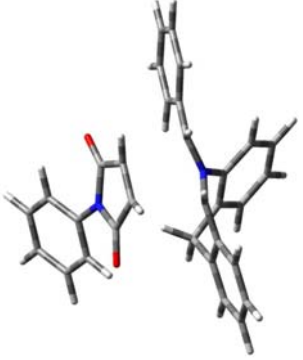                                                                          |            |            |            |                                                                          |            |            |            |
| <b>E</b> = -1455.65190529, <b>H (0K)</b> = -1455.180439,<br><b>H (298K)</b> = -1455.152466, <b>G (298K)</b> = -1455.238747<br>au. Imaginary frequency = 1. |            |            |            | <b>E</b> = -1455.65050462, <b>H (0K)</b> = -1455.178897,<br><b>H (298K)</b> = -1455.150932, <b>G (298K)</b> = -1455.237435<br>au. Imaginary frequency = 1. |            |            |            |
| C                                                                                                                                                          | 0.3332810  | -1.4746430 | 1.6857830  | C                                                                                                                                                          | -0.5284300 | 0.4722540  | -2.6883720 |
| C                                                                                                                                                          | -0.6780090 | -1.8451010 | 0.7906340  | C                                                                                                                                                          | 0.8396870  | 0.6079290  | -2.5660970 |
| N                                                                                                                                                          | -0.6225270 | -1.5006570 | -0.6235700 | C                                                                                                                                                          | -0.5598190 | -1.9423280 | 1.6915630  |
| C                                                                                                                                                          | 0.4930470  | -1.7978140 | -1.3677750 | C                                                                                                                                                          | 0.1838230  | -1.1381810 | 0.8143450  |
| C                                                                                                                                                          | 1.7965840  | -2.1869250 | -0.8807810 | N                                                                                                                                                          | 0.2351260  | -1.4901630 | -0.6013920 |
| C                                                                                                                                                          | 2.3692200  | -1.6873270 | 0.3173790  | C                                                                                                                                                          | -0.9155380 | -1.6026120 | -1.3344490 |
| C                                                                                                                                                          | 2.5803130  | -3.0282350 | -1.7016080 | C                                                                                                                                                          | -2.2746170 | -1.7927770 | -0.8138590 |
| C                                                                                                                                                          | 3.8690700  | -3.3942420 | -1.3376720 | C                                                                                                                                                          | -2.5442580 | -2.5462450 | 0.3530740  |
| C                                                                                                                                                          | 4.4133510  | -2.9235760 | -0.1394600 | C                                                                                                                                                          | -3.3618130 | -1.3270340 | -1.5775900 |
| C                                                                                                                                                          | 3.6596510  | -2.0779690 | 0.6746530  | C                                                                                                                                                          | -4.6741980 | -1.5797430 | -1.1891890 |
| C                                                                                                                                                          | 0.2159320  | -1.8782290 | 3.0222870  | C                                                                                                                                                          | -4.9321930 | -2.3066980 | -0.0267950 |
| C                                                                                                                                                          | -0.8655390 | -2.6366630 | 3.4600660  | C                                                                                                                                                          | -3.8654290 | -2.7825350 | 0.7356010  |
| C                                                                                                                                                          | -1.8451970 | -3.0316010 | 2.5469640  | C                                                                                                                                                          | -0.5720530 | -1.6093230 | 3.0503440  |
| C                                                                                                                                                          | -1.7486430 | -2.6420370 | 1.2155390  | C                                                                                                                                                          | 0.1389470  | -0.5129660 | 3.5320940  |
| C                                                                                                                                                          | -1.7386890 | -1.0371610 | -1.2807470 | C                                                                                                                                                          | 0.8730220  | 0.2753800  | 2.6463760  |
| C                                                                                                                                                          | -2.9812410 | -0.5603800 | -0.6968890 | C                                                                                                                                                          | 0.9018630  | -0.0369940 | 1.2893760  |
| C                                                                                                                                                          | -3.0756970 | 0.1612410  | 0.5129890  | C                                                                                                                                                          | 1.4190000  | -1.3947790 | -1.2831700 |
| C                                                                                                                                                          | -4.1653290 | -0.7562030 | -1.4417040 | C                                                                                                                                                          | 2.7558630  | -1.5178280 | -0.6689930 |
| C                                                                                                                                                          | -5.3908500 | -0.2800580 | -0.9874600 | C                                                                                                                                                          | 3.0161390  | -2.3923450 | 0.4041440  |
| C                                                                                                                                                          | -5.4692690 | 0.4084920  | 0.2252620  | C                                                                                                                                                          | 3.8380210  | -0.8191270 | -1.2339700 |
| C                                                                                                                                                          | -4.3050640 | 0.6277790  | 0.9658740  | C                                                                                                                                                          | 5.1316670  | -0.9894000 | -0.7441050 |
| H                                                                                                                                                          | 0.2652660  | -2.0491670 | -2.3961030 | C                                                                                                                                                          | 5.3747280  | -1.8563230 | 0.3220370  |
| H                                                                                                                                                          | 2.1558800  | -3.3986230 | -2.6319650 | C                                                                                                                                                          | 4.3096960  | -2.5555560 | 0.8938430  |
| H                                                                                                                                                          | 4.4487650  | -4.0473390 | -1.9839890 | H                                                                                                                                                          | -0.7390620 | -1.9721610 | -2.3360650 |
| H                                                                                                                                                          | 5.4216760  | -3.2027490 | 0.1526640  | H                                                                                                                                                          | -3.1742880 | -0.7282760 | -2.4609300 |
| H                                                                                                                                                          | 4.0876260  | -1.6953700 | 1.5981510  | H                                                                                                                                                          | -5.4937690 | -1.1948480 | -1.7892520 |
| H                                                                                                                                                          | 0.9965580  | -1.5897530 | 3.7213530  | H                                                                                                                                                          | -5.9543240 | -2.5036750 | 0.2844840  |
| H                                                                                                                                                          | -0.9370120 | -2.9302020 | 4.5034990  | H                                                                                                                                                          | -4.0578580 | -3.3614560 | 1.6359940  |
| H                                                                                                                                                          | -2.6817860 | -3.6461190 | 2.8659130  | H                                                                                                                                                          | -1.1523510 | -2.2250450 | 3.7327860  |
| H                                                                                                                                                          | -2.5025420 | -2.9498920 | 0.5008130  | H                                                                                                                                                          | 0.1167650  | -0.2736720 | 4.5915170  |
| H                                                                                                                                                          | -1.8018180 | -1.3902490 | -2.3036490 | H                                                                                                                                                          | 1.4251240  | 1.1395530  | 3.0020870  |
| H                                                                                                                                                          | -2.1832560 | 0.3698540  | 1.0912860  | H                                                                                                                                                          | 1.4924440  | 0.5704020  | 0.6167760  |
| H                                                                                                                                                          | -4.1146910 | -1.2959020 | -2.3850800 | H                                                                                                                                                          | 1.3398800  | -1.7572690 | -2.3000160 |
| H                                                                                                                                                          | -6.2864860 | -0.4499880 | -1.5791550 | H                                                                                                                                                          | 2.2030820  | -2.9582630 | 0.8477660  |
| H                                                                                                                                                          | -6.4247900 | 0.7813000  | 0.5833790  | H                                                                                                                                                          | 3.6568150  | -0.1076990 | -2.0318660 |
|                                                                                                                                                            |            |            |            | H                                                                                                                                                          | 5.9494750  | -0.4302130 | -1.1904530 |

|                                                                                                                            |            |            |            |                                                                                                                            |            |            |            |
|----------------------------------------------------------------------------------------------------------------------------|------------|------------|------------|----------------------------------------------------------------------------------------------------------------------------|------------|------------|------------|
| H                                                                                                                          | -4.3508200 | 1.1837090  | 1.8982670  | H                                                                                                                          | 6.3831510  | -1.9849230 | 0.7056930  |
| C                                                                                                                          | 1.5597650  | -0.7536470 | 1.1884190  | H                                                                                                                          | 4.4862310  | -3.2393620 | 1.7200390  |
| H                                                                                                                          | 2.1596160  | -0.4026620 | 2.0329360  | C                                                                                                                          | -1.3856060 | -3.0889910 | 1.1607130  |
| H                                                                                                                          | 1.2632450  | 0.1300200  | 0.6147000  | H                                                                                                                          | -1.7540020 | -3.6997100 | 1.9904150  |
| C                                                                                                                          | 0.5999190  | 0.4372700  | -2.6298850 | H                                                                                                                          | -0.7659890 | -3.7422660 | 0.5292540  |
| C                                                                                                                          | -0.6943390 | 0.8575240  | -2.4453140 | C                                                                                                                          | -1.1853810 | 1.4490300  | -1.7993110 |
| C                                                                                                                          | -0.7057360 | 1.8988420  | -1.3915830 | O                                                                                                                          | -2.3721750 | 1.6969490  | -1.6861800 |
| O                                                                                                                          | -1.6684070 | 2.5200250  | -0.9767040 | C                                                                                                                          | 1.1177490  | 1.6798620  | -1.5836180 |
| C                                                                                                                          | 1.4850790  | 1.1939160  | -1.7280740 | O                                                                                                                          | 2.2041000  | 2.1202870  | -1.2389380 |
| O                                                                                                                          | 2.6993550  | 1.1368490  | -1.6496300 | H                                                                                                                          | -1.0728970 | 0.0387910  | -3.5156980 |
| H                                                                                                                          | -1.5352030 | 0.7707940  | -3.1182050 | H                                                                                                                          | 1.5925690  | 0.3335370  | -3.2915200 |
| H                                                                                                                          | 1.0203400  | -0.1106020 | -3.4613980 | N                                                                                                                          | -0.1377850 | 2.1151680  | -1.0965210 |
| N                                                                                                                          | 0.6395910  | 2.0497610  | -0.9504180 | C                                                                                                                          | -0.3374310 | 3.1085130  | -0.0971450 |
| C                                                                                                                          | 1.0960260  | 3.0027630  | 0.0098990  | C                                                                                                                          | -1.4034570 | 2.9849790  | 0.8050640  |
| C                                                                                                                          | 0.3370890  | 4.1504260  | 0.2934200  | C                                                                                                                          | 0.5267570  | 4.2084700  | -0.0085260 |
| C                                                                                                                          | 2.3164910  | 2.8067780  | 0.6782590  | C                                                                                                                          | -1.6015310 | 3.9607470  | 1.7804550  |
| C                                                                                                                          | 0.7906550  | 5.0692170  | 1.2387710  | H                                                                                                                          | -2.0765180 | 2.1404920  | 0.7303540  |
| H                                                                                                                          | -0.6054320 | 4.3097610  | -0.2099620 | C                                                                                                                          | 0.3251760  | 5.1681130  | 0.9829900  |
| C                                                                                                                          | 2.7583220  | 3.7421780  | 1.6131240  | H                                                                                                                          | 1.3543710  | 4.2989630  | -0.6996380 |
| H                                                                                                                          | 2.9297270  | 1.9493790  | 0.4407650  | C                                                                                                                          | -0.7385690 | 5.0533900  | 1.8787410  |
| C                                                                                                                          | 2.0003080  | 4.8754490  | 1.9055710  | H                                                                                                                          | -2.4353710 | 3.8594230  | 2.4701350  |
| H                                                                                                                          | 0.1873700  | 5.9491300  | 1.4471170  | H                                                                                                                          | 1.0036660  | 6.0148070  | 1.0467500  |
| H                                                                                                                          | 3.7089660  | 3.5767700  | 2.1138610  | H                                                                                                                          | -0.8948210 | 5.8086510  | 2.6443160  |
| H                                                                                                                          | 2.3487740  | 5.5987950  | 2.6377620  |                                                                                                                            |            |            |            |
| Compound 36-A                                                                                                              |            |            |            | Compound 36-B                                                                                                              |            |            |            |
| E = -712.79985152, H (0K) = -712.499675,<br>H (298K) = -712.485341, G (298K) = -712.539527 au.<br>Imaginary frequency = 0. |            |            |            | E = -712.79992176, H (0K) = -712.500206,<br>H (298K) = -712.485736, G (298K) = -712.540463 au.<br>Imaginary frequency = 0. |            |            |            |
| N                                                                                                                          | 0.6538310  | 1.2609020  | 0.0919160  | N                                                                                                                          | -0.7934490 | 1.2058920  | 0.2666770  |
| C                                                                                                                          | -1.2158040 | 2.6901320  | 0.2111580  | C                                                                                                                          | 1.0583770  | 2.6434950  | 0.2746970  |
| C                                                                                                                          | 0.0538970  | 3.5336440  | 0.3452010  | C                                                                                                                          | -0.2183120 | 3.4728900  | 0.5728870  |
| C                                                                                                                          | 1.1237040  | 2.6075720  | -0.2410010 | C                                                                                                                          | -1.3804590 | 2.5401120  | 0.1755830  |
| C                                                                                                                          | 1.5009760  | 0.1641880  | -0.0341510 | C                                                                                                                          | -1.5995090 | 0.0759510  | -0.0061000 |
| C                                                                                                                          | 2.6966080  | 0.3080480  | -0.7747480 | C                                                                                                                          | -2.8106170 | 0.1464030  | -0.7085440 |
| C                                                                                                                          | 3.6024190  | -0.7401990 | -0.9171130 | C                                                                                                                          | -3.5831120 | -1.0010170 | -0.9028800 |
| C                                                                                                                          | 3.3467880  | -1.9780050 | -0.3353870 | C                                                                                                                          | -3.1539420 | -2.2290510 | -0.4044010 |
| C                                                                                                                          | 2.1648540  | -2.1352230 | 0.3896170  | C                                                                                                                          | -1.9552570 | -2.2980530 | 0.3112310  |
| C                                                                                                                          | 1.2439960  | -1.1010660 | 0.5644410  | C                                                                                                                          | -1.1806650 | -1.1602310 | 0.5318180  |
| C                                                                                                                          | -0.0112630 | -1.3730250 | 1.3785540  | C                                                                                                                          | 0.0762640  | -1.1896200 | 1.3711810  |
| C                                                                                                                          | -1.2690850 | -1.1742330 | 0.5615580  | C                                                                                                                          | 1.3414240  | -0.9618800 | 0.5616240  |
| C                                                                                                                          | -2.0667000 | -2.2579990 | 0.1869490  | C                                                                                                                          | 2.3545120  | -1.9302940 | 0.5939710  |
| C                                                                                                                          | -3.2057500 | -2.0732570 | -0.5978220 | C                                                                                                                          | 3.5221140  | -1.7985520 | -0.1539660 |
| C                                                                                                                          | -3.5509730 | -0.7902060 | -1.0156670 | C                                                                                                                          | 3.6854800  | -0.6815580 | -0.9725010 |
| C                                                                                                                          | -2.7557580 | 0.2984000  | -0.6496870 | C                                                                                                                          | 2.6833760  | 0.2840350  | -1.0181140 |
| C                                                                                                                          | -1.6097400 | 0.1239060  | 0.1324130  | C                                                                                                                          | 1.5125430  | 0.1727530  | -0.2525360 |
| C                                                                                                                          | -0.7417080 | 1.2820790  | 0.6043240  | C                                                                                                                          | 0.5336790  | 1.3322250  | -0.3669430 |
| H                                                                                                                          | -1.5463010 | 2.7018530  | -0.8335520 | H                                                                                                                          | 1.5953340  | 2.4050690  | 1.1975860  |
| H                                                                                                                          | 0.2674930  | 3.7402450  | 1.4008650  | H                                                                                                                          | -0.2517250 | 4.4092840  | 0.0076760  |
| H                                                                                                                          | 2.1175670  | 2.7899820  | 0.1875200  | H                                                                                                                          | -1.7107510 | 2.7766820  | -0.8531850 |
| H                                                                                                                          | 2.9155100  | 1.2514850  | -1.2607430 | H                                                                                                                          | -3.1533250 | 1.0953390  | -1.1084040 |
| H                                                                                                                          | 4.5088860  | -0.5792860 | -1.4956120 | H                                                                                                                          | -4.5190780 | -0.9294880 | -1.4510980 |
| H                                                                                                                          | 4.0442140  | -2.8037140 | -0.4406170 | H                                                                                                                          | -3.7508590 | -3.1241600 | -0.5559630 |
| H                                                                                                                          | 1.9471160  | -3.0958860 | 0.8522650  | H                                                                                                                          | -1.6275560 | -3.2484140 | 0.7271620  |
| H                                                                                                                          | 0.0261000  | -2.4024590 | 1.7487330  | H                                                                                                                          | -0.0084800 | -0.4121150 | 2.1427220  |
| H                                                                                                                          | -0.0324750 | -0.7317160 | 2.2713030  | H                                                                                                                          | 0.1520120  | -2.1524200 | 1.8873790  |
| H                                                                                                                          | -1.7912990 | -3.2575450 | 0.5156570  | H                                                                                                                          | 2.2154000  | -2.8086610 | 1.2204060  |
| H                                                                                                                          | -3.8186890 | -2.9262420 | -0.8770560 | H                                                                                                                          | 4.2895830  | -2.5665770 | -0.1071450 |
| H                                                                                                                          | -4.4384890 | -0.6300760 | -1.6220660 | H                                                                                                                          | 4.5813520  | -0.5645560 | -1.5763900 |
| H                                                                                                                          | -3.0499590 | 1.2909700  | -0.9743420 | H                                                                                                                          | 2.8070190  | 1.1496210  | -1.6659830 |
| H                                                                                                                          | -0.7224800 | 1.2444270  | 1.7075870  | H                                                                                                                          | 0.3885210  | 1.5205940  | -1.4497580 |

|                                                                                                                                          |            |            |            |                                                                                                                                          |            |            |            |
|------------------------------------------------------------------------------------------------------------------------------------------|------------|------------|------------|------------------------------------------------------------------------------------------------------------------------------------------|------------|------------|------------|
| H                                                                                                                                        | -2.0460120 | 3.0322180  | 0.8366870  | H                                                                                                                                        | 1.7577360  | 3.1586260  | -0.3902680 |
| H                                                                                                                                        | -0.0047980 | 4.4915170  | -0.1805190 | H                                                                                                                                        | -0.2731140 | 3.7285280  | 1.6350140  |
| H                                                                                                                                        | 1.2080340  | 2.7493800  | -1.3313630 | H                                                                                                                                        | -2.2532990 | 2.6157630  | 0.8314650  |
| <b>TS of isomerization 36-A - 36-B</b>                                                                                                   |            |            |            | <b>TS of isomerization 37-A - 37-B</b>                                                                                                   |            |            |            |
| <b>E = -712.78662831, H (0K) = -712.487217,</b><br><b>H (298K) = -712.473511, G (298K) = -712.526094 au.</b><br>Imaginary frequency = 1. |            |            |            | <b>E = -748.68778354, H (0K) = -748.412813,</b><br><b>H (298K) = -748.399163, G (298K) = -748.452019 au.</b><br>Imaginary frequency = 1. |            |            |            |
| N                                                                                                                                        | -0.5495410 | 0.9812860  | 0.4649630  | N                                                                                                                                        | -0.6774980 | 1.1743510  | -0.2859360 |
| C                                                                                                                                        | 0.8214160  | 2.5570760  | -0.7322330 | C                                                                                                                                        | 1.1369210  | 2.6214600  | 0.0988290  |
| C                                                                                                                                        | -0.4157200 | 3.2622750  | -0.1605750 | C                                                                                                                                        | -0.1039510 | 3.5085600  | -0.0283660 |
| C                                                                                                                                        | -0.7641090 | 2.3292390  | 1.0020180  | C                                                                                                                                        | -1.2536700 | 2.5323300  | -0.3311870 |
| C                                                                                                                                        | -1.6067970 | 0.0820690  | 0.2471480  | C                                                                                                                                        | -1.5946390 | 0.1215950  | -0.1199170 |
| C                                                                                                                                        | -2.9610780 | 0.4701380  | 0.3379350  | C                                                                                                                                        | -2.9892870 | 0.3672090  | -0.1451070 |
| C                                                                                                                                        | -3.9970110 | -0.4214460 | 0.0851380  | C                                                                                                                                        | -3.9401300 | -0.6365860 | 0.0120130  |
| C                                                                                                                                        | -3.7122270 | -1.7326780 | -0.2938390 | C                                                                                                                                        | -3.5374800 | -1.9537850 | 0.2142190  |
| C                                                                                                                                        | -2.3803870 | -2.1228540 | -0.3845650 | C                                                                                                                                        | -2.1774400 | -2.2344190 | 0.2110350  |
| C                                                                                                                                        | -1.3136120 | -1.2571270 | -0.0997920 | C                                                                                                                                        | -1.2173200 | -1.2344110 | 0.0231370  |
| C                                                                                                                                        | 0.0625070  | -1.9243230 | -0.1101970 | C                                                                                                                                        | 1.2882200  | -1.2139180 | -0.0497510 |
| C                                                                                                                                        | 1.4102470  | -1.2232200 | 0.0227350  | C                                                                                                                                        | 2.2925840  | -2.1732710 | -0.2664990 |
| C                                                                                                                                        | 2.4856870  | -2.0506690 | 0.3781120  | C                                                                                                                                        | 3.6329940  | -1.8248420 | -0.2293770 |
| C                                                                                                                                        | 3.7984630  | -1.5859230 | 0.4020710  | C                                                                                                                                        | 3.9861350  | -0.4997050 | 0.0328910  |
| C                                                                                                                                        | 4.0583970  | -0.2622020 | 0.0573950  | C                                                                                                                                        | 2.9844650  | 0.4427340  | 0.2352730  |
| C                                                                                                                                        | 2.9968830  | 0.5787450  | -0.2751980 | C                                                                                                                                        | 1.6115840  | 0.1280040  | 0.1898730  |
| C                                                                                                                                        | 1.6707900  | 0.1268270  | -0.2777830 | C                                                                                                                                        | 0.5963530  | 1.2263430  | 0.4734280  |
| C                                                                                                                                        | 0.4992360  | 1.0464350  | -0.5947380 | H                                                                                                                                        | 1.8442210  | 3.0025860  | 0.8398600  |
| H                                                                                                                                        | 1.6867410  | 2.8252980  | -0.1177910 | H                                                                                                                                        | -0.3012310 | 4.0400220  | 0.9083470  |
| H                                                                                                                                        | -1.2351710 | 3.2773270  | -0.8896970 | H                                                                                                                                        | -2.0427550 | 2.6553980  | 0.4247890  |
| H                                                                                                                                        | -1.7707900 | 2.4572460  | 1.3979690  | H                                                                                                                                        | -3.3475840 | 1.3735770  | -0.3106440 |
| H                                                                                                                                        | -3.2148390 | 1.4942750  | 0.5862400  | H                                                                                                                                        | -4.9944030 | -0.3762070 | -0.0207800 |
| H                                                                                                                                        | -5.0260350 | -0.0799520 | 0.1645130  | H                                                                                                                                        | -4.2613210 | -2.7512950 | 0.3517420  |
| H                                                                                                                                        | -4.5091770 | -2.4388170 | -0.5083140 | H                                                                                                                                        | -1.8096420 | -3.2491790 | 0.3257740  |
| H                                                                                                                                        | -2.1464310 | -3.1503020 | -0.6592590 | H                                                                                                                                        | 1.9759800  | -3.1937930 | -0.4561750 |
| H                                                                                                                                        | 0.0346820  | -2.6881550 | 0.6792730  | H                                                                                                                                        | 4.3943980  | -2.5812950 | -0.3982220 |
| H                                                                                                                                        | 0.1182120  | -2.5074170 | -1.0426520 | H                                                                                                                                        | 5.0289480  | -0.1994520 | 0.0753810  |
| H                                                                                                                                        | 2.2850540  | -3.0907790 | 0.6283010  | H                                                                                                                                        | 3.2806270  | 1.4647770  | 0.4407740  |
| H                                                                                                                                        | 4.6078950  | -2.2551770 | 0.6815950  | H                                                                                                                                        | 0.3683120  | 1.2085120  | 1.5558350  |
| H                                                                                                                                        | 5.0754500  | 0.1206590  | 0.0550740  | H                                                                                                                                        | 1.6585900  | 2.5478670  | -0.8607600 |
| H                                                                                                                                        | 3.2159810  | 1.6073770  | -0.5409470 | H                                                                                                                                        | 0.0147210  | 4.2657820  | -0.8086960 |
| H                                                                                                                                        | 0.0407280  | 0.7020320  | -1.5339270 | H                                                                                                                                        | -1.7145180 | 2.7013450  | -1.3115290 |
| H                                                                                                                                        | 1.0504650  | 2.8309350  | -1.7665640 | O                                                                                                                                        | 0.0445130  | -1.7741120 | -0.0846390 |
| H                                                                                                                                        | -0.2124720 | 4.2924480  | 0.1507970  |                                                                                                                                          |            |            |            |
| H                                                                                                                                        | -0.0696130 | 2.4998420  | 1.8388390  |                                                                                                                                          |            |            |            |
| <b>Compound 37-A</b>                                                                                                                     |            |            |            | <b>Compound 37-B</b>                                                                                                                     |            |            |            |
| <b>E = -748.69671681, H (0K) = -748.421731,</b><br><b>H (298K) = -748.407499, G (298K) = -748.461532 au.</b><br>Imaginary frequency = 0. |            |            |            | <b>E = -748.69362134, H (0K) = -748.418885,</b><br><b>H (298K) = -748.404523, G (298K) = -748.459422 au.</b><br>Imaginary frequency = 0. |            |            |            |
| N                                                                                                                                        | 0.6287940  | 1.2621120  | -0.0533650 | O                                                                                                                                        | 0.0643130  | -1.3317360 | -1.0574280 |
| C                                                                                                                                        | -1.2021450 | 2.6981730  | 0.2591870  | N                                                                                                                                        | -0.7601250 | 1.2180840  | -0.2707990 |
| C                                                                                                                                        | 0.0786680  | 3.5346210  | 0.3399240  | C                                                                                                                                        | -1.3403860 | 2.5572990  | -0.2195740 |
| C                                                                                                                                        | 1.1332150  | 2.6172770  | -0.2957520 | H                                                                                                                                        | -1.7236610 | 2.8017680  | 0.7887850  |
| C                                                                                                                                        | 1.4849370  | 0.1713240  | -0.0895870 | C                                                                                                                                        | -0.1550820 | 3.4784150  | -0.5640020 |
| C                                                                                                                                        | 2.7464630  | 0.2798550  | -0.7177170 | H                                                                                                                                        | -0.1522440 | 3.7204180  | -1.6305310 |
| C                                                                                                                                        | 3.6477540  | -0.7822620 | -0.7540980 | C                                                                                                                                        | 1.1007900  | 2.6485430  | -0.1917140 |
| C                                                                                                                                        | 3.3260200  | -2.0064650 | -0.1735710 | H                                                                                                                                        | 1.7511680  | 3.1619360  | 0.5221340  |
| C                                                                                                                                        | 2.0760440  | -2.1476930 | 0.4304340  | C                                                                                                                                        | 0.5430590  | 1.3276660  | 0.4030180  |
| C                                                                                                                                        | 1.1736830  | -1.0921740 | 0.4732960  | H                                                                                                                                        | 0.3698490  | 1.4844610  | 1.4865610  |
| C                                                                                                                                        | -1.1977160 | -1.1575700 | 0.4533780  | C                                                                                                                                        | -1.5864400 | 0.1108390  | -0.0095850 |

|   |            |            |            |   |            |            |            |
|---|------------|------------|------------|---|------------|------------|------------|
| C | -1.9770410 | -2.2700970 | 0.1499270  | C | -1.1380900 | -1.1684480 | -0.3907020 |
| C | -3.1966640 | -2.0909470 | -0.5046280 | C | -1.9328440 | -2.2958530 | -0.2178090 |
| C | -3.6192440 | -0.8066350 | -0.8470020 | H | -1.5413940 | -3.2553050 | -0.5415050 |
| C | -2.8270960 | 0.2998740  | -0.5290500 | C | -3.2112670 | -2.1756300 | 0.3312180  |
| C | -1.6029090 | 0.1428700  | 0.1274920  | H | -3.8329890 | -3.0570880 | 0.4579800  |
| C | -0.7089110 | 1.2812630  | 0.5814850  | C | -3.6796160 | -0.9168890 | 0.7027380  |
| H | -1.6012070 | 2.7350640  | -0.7609710 | H | -4.6743170 | -0.8059400 | 1.1259030  |
| H | 0.3352950  | 3.7330620  | 1.3872430  | C | -2.8752110 | 0.2127380  | 0.5388620  |
| H | 2.1242940  | 2.7561670  | 0.1564540  | H | -3.2570280 | 1.1847450  | 0.8320750  |
| H | 3.0209530  | 1.2153750  | -1.1915110 | C | 1.5049220  | 0.1607890  | 0.2658050  |
| H | 4.6072020  | -0.6418500 | -1.2450600 | C | 1.2567930  | -1.0320920 | -0.4260310 |
| H | 4.0232050  | -2.8384220 | -0.1940310 | C | 2.2507180  | -2.0094490 | -0.5553660 |
| H | 1.7739450  | -3.0816830 | 0.8947090  | H | 2.0061770  | -2.9093580 | -1.1107980 |
| H | -1.6198010 | -3.2554840 | 0.4319270  | C | 3.5016600  | -1.8289420 | 0.0225290  |
| H | -3.8119540 | -2.9533300 | -0.7462860 | H | 4.2633530  | -2.5965490 | -0.0824520 |
| H | -4.5685100 | -0.6609250 | -1.3548620 | C | 3.7589710  | -0.6668140 | 0.7535680  |
| H | -3.1817390 | 1.2934410  | -0.7844530 | H | 4.7241920  | -0.5146030 | 1.2279720  |
| H | -0.5990480 | 1.1900460  | 1.6757170  | C | 2.7675500  | 0.3022800  | 0.8673530  |
| H | -1.9870180 | 3.0275440  | 0.9466400  | H | 2.9737810  | 1.2089070  | 1.4315850  |
| H | -0.0015250 | 4.4978120  | -0.1727740 | H | -0.2142490 | 4.4219470  | -0.0131810 |
| H | 1.2368890  | 2.8132840  | -1.3743330 | H | 1.6971320  | 2.4218710  | -1.0798060 |
| O | -0.0203590 | -1.3366710 | 1.1603560  | H | -2.1765610 | 2.6333620  | -0.9215500 |
